# Supplementary material for: Glucocorticoid stimulation induces regionalized gene responses within topologically associating domains
Source: Front Genet. 2023 Jul 27;14:1237092. doi: 10.3389/fgene.2023.1237092 (PMC10413275; doi:10.3389/fgene.2023.1237092)
Supplement: Supplementary file 2 [file Table3.XLSX]

## Sheet: DEGs
gene_id	symbol	rna_category	log2FC_0.5h	log2FC_1h	log2FC_2h	log2FC_3h	log2FC_4h	log2FC_5h	log2FC_6h	gains	losses	tad_id	tad_category	tad_score
ENSG00000128016	ZFP36	activated	2.157754077515486	2.528396827349691	2.5595957816520665	2.5560858048676054	2.531170611105713	2.669149413375556	2.6075535351685892	TRUE	FALSE	NA	NA	NA
ENSG00000067082	KLF6	activated	1.301371638118939	1.499851354464015	1.2058694788989166	1.3657466472849713	1.4101079133299836	1.4279001903886763	1.3298312588708143	TRUE	FALSE	chr10_3150000_4800000	TAD_UP	1
ENSG00000179094	PER1	activated	1.3910062650297614	2.5568566065280214	3.4282452253591345	3.4644803685213144	3.5505955712640307	3.469960751537344	3.4018126867382144	TRUE	FALSE	chr17_8100000_8250000	TAD_UP	1
ENSG00000116741	RGS2	activated	1.6315031140439504	2.1797726621263327	2.544471033592457	2.9753097815323595	2.706289701992519	2.7796233844775102	2.5771849102544717	TRUE	FALSE	chr1_192450000_193100000	TAD_UP	1
ENSG00000120129	DUSP1	activated	1.0607134691221825	1.3268229004312186	1.300706817426656	1.5230750534529425	1.4619306407564534	1.6303902515510895	1.608835927390684	TRUE	FALSE	chr5_172100000_176900000	TAD_UP	0.928571428571429
ENSG00000157514	TSC22D3	activated	1.7415162382541671	3.005970752547285	4.246973070922431	4.070210278085915	4.104722291636628	3.938461621599558	3.836210427557502	TRUE	FALSE	chrX_106800000_108150000	TAD_BALANCED	0.642857142857143
ENSG00000057657	PRDM1	activated	1.0432746980509584	1.0379212851395458	0.5188986570943047	0.40007059093242986	0.307075029131668	0.6597759905588608	0.5449498262794151	FALSE	FALSE	chr6_105400000_106350000	TAD_UP	1
ENSG00000100906	NFKBIA	activated	1.0128711940306407	1.5042032638823932	1.2286297311369112	1.3567785815692397	1.433341301238154	1.2075374521901543	1.244892002593874	TRUE	FALSE	chr14_35100000_35450000	TAD_UP	1
ENSG00000171522	PTGER4	activated	1.8014020770184944	3.093721185133784	3.241999920746385	3.448255907178193	3.2200826986963267	3.18234689450345	3.060279948987597	TRUE	FALSE	chr5_39550000_40900000	TAD_UP	1
ENSG00000116285	ERRFI1	activated	0.970140228798781	1.6890829895241637	1.906047014486682	1.964703382834472	1.903008034516605	2.0880190688359654	2.031488191643489	TRUE	FALSE	chr1_7950000_8350000	TAD_UP	1
ENSG00000118503	TNFAIP3	activated	1.1672820199069356	1.457528125146015	1.1077473258262769	1.4215263090963763	1.4022404102198622	1.5339627142048016	1.5844760068206925	TRUE	FALSE	chr6_136800000_138100000	TAD_UP	1
ENSG00000204531	POU5F1	activated	1.7735759526242527	2.3345372493911243	2.251827463541954	2.389525699703645	2.348462571997518	2.327347714112792	2.258582934819505	TRUE	FALSE	chr6_31100000_31200000	TAD_UP	1
ENSG00000164056	SPRY1	activated	1.775375272791669	2.386146730975808	2.935957063971148	2.60196473520335	2.7360732447395915	2.740790665252191	2.4928343652443097	TRUE	FALSE	chr4_123100000_123700000	TAD_UP	1
ENSG00000167772	ANGPTL4	activated	1.547699241509543	2.164457831459212	3.830010050185569	4.467764711274901	4.084047950816601	4.465699407105536	4.235060378478066	TRUE	FALSE	chr19_8300000_8600000	TAD_UP	1
ENSG00000163874	ZC3H12A	activated	1.045693256608904	1.1930993478426293	1.505433165741831	1.6955828109234998	1.5719467829781713	1.706018454760198	1.66628630399416	TRUE	FALSE	chr1_37450000_37550000	TAD_UP	1
ENSG00000136826	KLF4	activated	0.9188867914853296	1.5935266278534963	1.7728597269353197	1.7502923344712795	1.6487712620947188	1.4751479211679777	1.4327191956868233	TRUE	FALSE	chr9_107350000_108900000	TAD_UP	1
ENSG00000163659	TIPARP	activated	0.6937450600068784	2.150951531162626	2.609030052853585	2.3908448999957557	2.03464152877517	1.751827410892907	1.5866193262795565	TRUE	FALSE	chr3_155950000_157200000	TAD_UP	1
ENSG00000172216	CEBPB	activated	0.7603660828438047	0.9512956559422492	1.3333348562679357	1.4768249962612174	1.2783442874164843	1.1945418725293593	1.128882790561193	TRUE	FALSE	chr20_50100000_50800000	TAD_UP	0.9375
ENSG00000204528	PSORS1C3	activated	2.62673809299815	2.563980973625637	2.8665326453302233	2.307697554602947	2.9527626890128267	2.4443342425967844	2.6387126870482462	FALSE	FALSE	chr6_31100000_31200000	TAD_UP	1
ENSG00000146278	PNRC1	activated	0.5156674132231792	0.8972994728464087	0.4456104864966084	0.53320801546082075	0.8003433533232862	0.920802015560373	1.0842382297465878	TRUE	FALSE	chr6_88950000_89350000	TAD_UP	1
ENSG00000178726	THBD	activated	0.49303690058007926	1.043565807713906	1.4782137920536444	1.915249052709896	1.927164087564202	2.075312694567764	1.9816532029991336	TRUE	FALSE	chr20_16850000_25000000	TAD_UP	0.961538461538462
ENSG00000168497	CAVIN2	activated	0.6081167049777898	1.2413520772470144	1.4742470817961202	1.8920277398953056	1.9822230271842327	1.9370103958219815	1.9810638436863923	TRUE	FALSE	chr2_191750000_192200000	TAD_UP	1
ENSG00000187288	CIDEC	activated	0.9656482426724045	1.5510652710856352	3.5229360944231485	4.074771609746069	4.180269694545112	4.802799666149589	4.910632079891835	TRUE	FALSE	chr3_8450000_15600000	TAD_UP	0.833333333333333
ENSG00000019549	SNAI2	activated	1.6698803521168537	2.4211485102881665	2.452952349302828	2.998685731566922	2.7456261019022845	2.966403184106129	3.104085633033533	TRUE	FALSE	chr8_47950000_49000000	TAD_UP	1
ENSG00000081041	CXCL2	activated	1.3525574538809817	0.7394288537810606	0.2623276393942574	0.46825053580311415	0.4415534433606723	0.7798972392090783	0.7548689005794802	TRUE	FALSE	chr4_73550000_74200000	TAD_UP	1
ENSG00000164442	CITED2	activated	0.6865830088305616	1.1625307440900503	0.7169288306361739	0.7008953365650067	0.7951407175386918	0.8368025564575262	0.757978355566902	TRUE	FALSE	chr6_138800000_142150000	TAD_UP	1
ENSG00000221869	CEBPD	activated	0.7125709242697793	1.0814899757371674	1.1283927707175192	1.2405964107775382	1.346458198248052	1.5813011343091845	1.645438886802306	TRUE	FALSE	chr8_46900000_47850000	TAD_UP	1
ENSG00000143384	MCL1	activated	0.4031511141910278	0.8762045864765232	1.0143015942210951	1.2530119814880991	1.2775219450769302	1.4721342504972406	1.4176722472942729	TRUE	FALSE	chr1_150550000_150650000	TAD_UP	1
ENSG00000139318	DUSP6	activated	0.9439989713782236	0.9836399544035104	0.3601749156702663	0.41504018930034126	0.7536769026178769	0.7772928407621659	0.4570315289681291	FALSE	FALSE	chr12_89000000_89500000	TAD_UP	1
ENSG00000185950	IRS2	activated	0.4640465266184622	0.7843753000405883	1.4383646242352304	1.6296938572040092	1.730016413242369	1.8605377159651064	1.6680959056518967	TRUE	FALSE	chr13_108900000_110200000	TAD_UP	1
ENSG00000203709	MIR29B2CHG	activated	0.980655779959962	0.9400786220728304	0.7844258285920973	0.56589173370134	0.860342331342279	0.5364032727340583	0.549390225804854	FALSE	FALSE	chr1_207800000_209850000	TAD_UP	1
ENSG00000167183	PRR15L	activated	0.6982768268775097	1.0907477612874537	2.719438963885805	2.6129465052712235	3.0978384682373945	2.941910656197932	2.861229010590408	TRUE	FALSE	chr17_47900000_48000000	TAD_UP	1
ENSG00000187193	MT1X	activated	0.528890720000309	1.238937529398388	1.5930348190434105	2.235218959162139	2.45804586733869	3.1010791933843658	3.279399649530027	TRUE	FALSE	chr16_56600000_56700000	TAD_UP	1
ENSG00000265972	TXNIP	activated	1.9523662695448891	2.680355414451995	2.8731717706923896	3.256140543298833	2.5599616508551155	2.2058626667680983	1.8862970929992575	TRUE	FALSE	chr1_145800000_146050000	TAD_UP	1
ENSG00000116717	GADD45A	activated	0.8053042193797725	1.1111518895072787	1.386616086328453	1.7406983661539353	1.3846277872887045	1.5048179651178566	1.3108261044656182	TRUE	FALSE	chr1_67500000_68500000	TAD_UP	0.888888888888889
ENSG00000119138	KLF9	activated	0.6887780206342907	1.1480173983193358	2.1353081706104824	2.53485753674934	2.5784458356944153	2.7008857927816914	2.7798555998573615	TRUE	FALSE	chr9_70250000_70650000	TAD_UP	1
ENSG00000100003	SEC14L2	activated	0.47043344990206715	0.6607387947175971	1.772317614617891	2.3032986432608475	2.113964445165207	2.408850882083993	2.260999365988175	FALSE	FALSE	chr22_30300000_30400000	NA	NA
ENSG00000106351	AGFG2	activated	-0.6205176465144083	-0.28040489364741955	-0.13999793894836124	0.5673453660220997	1.0073506768862843	0.8431232575281348	1.033301286826894	TRUE	FALSE	chr7_100450000_100600000	TAD_UP	1
ENSG00000205502	C2CD4B	activated	1.727489071541826	1.9849483720826533	1.7801878401616218	1.1964729361834692	0.8714345731081229	-0.43092292260277054	0.7439213630384148	FALSE	FALSE	chr15_61850000_62350000	TAD_UP	1
ENSG00000259375	NA	activated	1.1467039058037185	1.2251937985849155	1.633745494525637	1.5959572670264452	1.5831458079424687	1.000341997502012	1.0640642511549196	TRUE	FALSE	chr15_85500000_85600000	TAD_UP	1
ENSG00000141682	PMAIP1	activated	0.32927492307301387	0.8247040733291272	0.20929809103497532	0.1758957414830478	0.118233384085581	0.06359312168143726	-0.06053746912013576	FALSE	FALSE	chr18_59850000_59950000	NA	NA
ENSG00000108551	RASD1	activated	1.0490582429932405	2.293816972784289	3.060194404853503	2.852399695301745	2.1738034796985573	1.1715569888050827	0.5435412400274147	FALSE	FALSE	chr17_17300000_17650000	TAD_DOWN	0
ENSG00000176597	B3GNT5	activated	0.4423683233757394	1.0029685945509172	1.275723305746723	1.659404374034006	1.5754783516145243	1.6895108201955398	1.7279308294272842	TRUE	FALSE	chr3_183100000_183400000	TAD_UP	1
ENSG00000143878	RHOB	activated	0.3119371899319377	0.3700340764615632	0.7149465925486252	1.185033788778482	1.0817148114342576	1.1321066644533928	0.9454837724030576	TRUE	FALSE	chr2_20350000_20650000	TAD_UP	1
ENSG00000171621	SPSB1	activated	-0.09800529558802402	0.2455924382692795	0.6664251690723781	0.8214754582436947	0.6269359177276361	0.7409068664930987	0.6354391888760788	TRUE	FALSE	chr1_9250000_9500000	TAD_UP	1
ENSG00000142583	SLC2A5	activated	0.05376614814370971	0.5902122584650914	1.5501035360811566	1.7385362829610287	2.5329807980654477	2.0696370703678113	2.523248170372899	TRUE	FALSE	chr1_9000000_9100000	TAD_UP	1
ENSG00000116254	CHD5	activated	0.24477020163898183	-0.09399789470117235	0.6784476225518422	2.0056977017132067	1.92360408661101	1.9201814931573864	1.686933907302246	FALSE	FALSE	chr1_6100000_6200000	TAD_UP	1
ENSG00000233929	MT1XP1	activated	-0.7875610975320533	1.9143428123464468	3.0644701084080523	1.4255843830726134	1.938977437189423	3.552298849067461	2.5455695408699883	TRUE	FALSE	chr1_16000000_16250000	TAD_BALANCED	0.666666666666667
ENSG00000142677	IL22RA1	activated	0.3143526461747802	0.7270002115146565	2.3014675956993	2.2269772465937168	1.8486206859008316	1.5790164666164623	1.3097182388746738	FALSE	FALSE	chr1_24050000_24200000	NA	NA
ENSG00000169504	CLIC4	activated	-0.02979211555543328	0.28203575707607625	0.19672525748111783	0.6313348924695027	0.5799900020082084	0.7369403342468706	0.8455834262989845	TRUE	FALSE	chr1_24650000_24850000	TAD_UP	1
ENSG00000090020	SLC9A1	activated	-0.0028413347285406	0.18979108572681255	0.6227013931138615	0.7123328714810859	0.7293707937908893	0.788119994988418	0.6792137270427452	FALSE	FALSE	chr1_27100000_27300000	TAD_DOWN	0
ENSG00000158246	TENT5B	activated	0.672234332521778	-0.04222700623046882	0.5550125558142956	1.9932791823602192	1.57067476511868	1.7931833371017725	1.85097019374754	TRUE	FALSE	chr1_27000000_27100000	TAD_UP	1
ENSG00000188910	GJB3	activated	-0.18322420094333905	0.677374229897726	1.3297757697154389	2.008859566551233	1.8323652162629471	1.0508916627654774	1.2087094754520495	FALSE	FALSE	chr1_33500000_34800000	NA	NA
ENSG00000158292	GPR153	activated	-0.18705235240098125	-0.1551659051666707	0.5423978064345805	1.4475118352633158	1.974376102721897	1.9592131134409925	1.9649146659950203	TRUE	FALSE	chr1_6200000_6450000	TAD_UP	1
ENSG00000142733	MAP3K6	activated	-0.03321637767443238	0.04829173013479294	0.795740130608868	1.2144208667342522	1.2402184530392537	1.2939986583878464	1.193443241150342	FALSE	FALSE	chr1_27300000_27400000	NA	NA
ENSG00000233621	LINC01137	activated	0.07747431720074492	0.13789038926547162	0.6309544917632401	0.9780875202481458	0.8571136612783272	1.0714965146177853	0.8772467185191141	TRUE	FALSE	chr1_37450000_37550000	TAD_UP	1
ENSG00000127129	EDN2	activated	0.2161447772353627	1.0417145327336137	2.6122956827964416	3.385614282231583	2.8131058893714935	2.6787659451613983	2.565252941306981	TRUE	FALSE	chr1_41450000_42800000	TAD_UP	0.857142857142857
ENSG00000116954	RRAGC	activated	-0.01073242111551873	0.1751184212211332	0.819427173832775	0.6337179119522285	0.5729004939697148	0.6367484325937218	0.6530797036255778	FALSE	FALSE	chr1_38850000_39050000	NA	NA
ENSG00000253368	TRNP1	activated	-0.02875987437556054	0.08600922675148173	0.05735830519677858	0.5137412561833268	0.5045659976106777	0.6473038528468564	0.7553186264487246	TRUE	FALSE	chr1_26900000_27000000	TAD_UP	1
ENSG00000183317	EPHA10	activated	0.179375848763971	0.01321226585743086	0.34208407996582074	1.213853775867911	1.0037605803668237	0.9912306551719068	0.9436941993510224	FALSE	FALSE	chr1_37700000_37800000	NA	NA
ENSG00000162378	ZYG11B	activated	0.04479914588239516	0.1704178339174298	0.12549398978708484	0.46829608405751527	0.5207359206145806	0.7852262376317474	0.8154084378526495	FALSE	FALSE	chr1_52700000_53250000	TAD_UP	1
ENSG00000162599	NFIA	activated	0.13639894422318533	-0.09843786167738292	0.26776634080079037	0.617620627935439	0.8443990184793495	0.9908854249379389	0.9578790127892512	FALSE	FALSE	chr1_60850000_61900000	TAD_UP	1
ENSG00000134744	TUT4	activated	0.04335784097782877	0.09920877990103646	0.3501926585803173	0.8964210901447962	0.9971115735540046	1.230583832191498	1.2737060638359785	TRUE	FALSE	chr1_52400000_52700000	TAD_UP	1
ENSG00000116675	DNAJC6	activated	-0.14771124962362103	-0.1899714863813489	0.3760018172197241	0.698031473867366	0.7531807334812439	0.7196767906541267	0.6039884064648758	FALSE	FALSE	chr1_65050000_65750000	TAD_UP	1
ENSG00000162433	AK4	activated	0.13992775792179257	0.16579265766283413	0.4457629230479948	0.664826306727731	0.6927473034275933	0.854234664991692	0.8670135651677133	FALSE	FALSE	chr1_65050000_65750000	TAD_UP	1
ENSG00000137936	BCAR3	activated	-0.08682638906948772	0.39487969433523296	0.7942692623511614	0.7326494424485813	0.6412305876390089	0.4752351081744977	0.5054177001818166	TRUE	FALSE	chr1_93300000_93900000	TAD_UP	1
ENSG00000269113	TRABD2B	activated	-0.07866680405900646	-0.24882799073913467	1.7248104786337366	2.6297456857889983	2.148294960368544	2.670315990307921	2.5312146816433496	FALSE	FALSE	chr1_47350000_48100000	TAD_UP	1
ENSG00000069702	TGFBR3	activated	-0.1905841831279291	0.3373970053648336	0.5330931654048259	0.8855706799753796	0.9362559297871378	0.8777385110183596	0.9587344396992494	FALSE	FALSE	chr1_91500000_91950000	TAD_UP	1
ENSG00000117525	F3	activated	0.2503325407580299	1.538098008991399	1.799370386038134	2.088356650485428	1.660515244554733	1.1038376522697708	0.9376500164913704	TRUE	FALSE	chr1_94500000_94800000	TAD_UP	1
ENSG00000134250	NOTCH2	activated	0.09845798563655084	0.11814265568053613	0.4239149845005263	0.7475096738083779	0.707189916752769	1.0665141085078822	0.9247578263012132	FALSE	FALSE	NA	NA	NA
ENSG00000160685	ZBTB7B	activated	0.12700431046778218	0.28972137950089816	0.7739869345200033	0.8941315100271124	0.8670764029143438	0.986036251900462	0.804630541186818	TRUE	FALSE	chr1_154950000_155050000	TAD_UP	1
ENSG00000159208	CIART	activated	1.189758867914353	0.8100543021070995	3.51073927439447	3.10001262004087	3.3047466981384015	3.4507904976971635	3.6925566494323543	TRUE	FALSE	chr1_150250000_150350000	TAD_UP	1
ENSG00000286219	NOTCH2NLC	activated	0.3602825223974636	0.3598627299047475	1.1318474301473826	1.4888026805344463	1.631477167441906	1.53110013025917	1.6216557170906287	FALSE	FALSE	NA	NA	NA
ENSG00000231551	PDE4DIPP6	activated	1.4692030045582278	1.833942712166724	1.8280432269228073	1.3901480402788298	2.0413136578341433	1.851068873624147	2.4389742387416393	TRUE	FALSE	chr1_148350000_148450000	TAD_UP	1
ENSG00000224520	KRT8P45	activated	-0.01391855401924135	-0.16747599787529177	-0.11845118974908252	0.2243534800660468	0.33395211495099314	0.5861838987411322	0.7608128004408338	FALSE	FALSE	chr1_157050000_157150000	NA	NA
ENSG00000143127	ITGA10	activated	0.33101721230712805	0.6333403673379977	0.9789931468935688	1.6069034781901324	1.9002792871024967	2.1709892333532848	2.3843129866192516	FALSE	FALSE	chr1_145800000_146050000	TAD_UP	1
ENSG00000270629	NBPF14	activated	0.19124203004927295	0.4265906807027128	1.0192599813767202	1.6449150394259804	1.48628924813572	1.536433746471361	1.223031781599575	FALSE	FALSE	NA	NA	NA
ENSG00000271425	NBPF10	activated	0.3555703197292523	0.408429190345537	1.4637403834083491	1.447743889775035	1.562487881368834	1.808441587866543	1.4643871545482965	FALSE	FALSE	NA	NA	NA
ENSG00000232188	NA	activated	-0.3921903233236153	0.5064118787636473	0.6609972086620199	0.6864785358105998	1.5343464256897124	1.0644804990295638	1.5658809281179429	TRUE	FALSE	chr1_160650000_161150000	TAD_UP	1
ENSG00000213062	NA	activated	0.499186746362119	0.9206920786354744	1.6740107236795638	1.1678551190675837	1.0659789448308472	1.224611078281991	0.8550444670763852	TRUE	FALSE	chr1_168250000_169550000	TAD_UP	0.9
ENSG00000203739	PRDX6-AS1	activated	1.087488488287755	0.9513261977329064	1.646896116901194	1.593962226650577	1.4214980508186252	1.634952453135916	1.3872498557233568	TRUE	FALSE	chr1_172450000_174250000	TAD_UP	1
ENSG00000131779	PEX11B	activated	-0.1192300768480652	0.09082693398271188	0.4924342948467765	0.5679486352964136	0.690764865239768	0.8079309391663413	0.8427497979832008	FALSE	FALSE	chr1_145800000_146050000	TAD_UP	1
ENSG00000117479	SLC19A2	activated	0.25809180170354523	1.4567832087831414	2.0585917951800754	2.4581033738290263	2.304536735294119	2.3830415359418304	2.2044804734296206	TRUE	FALSE	chr1_168250000_169550000	TAD_UP	0.9
ENSG00000203697	CAPN8	activated	-0.7902287981188604	0.3353234682523262	0.4110503748921359	1.3603162964952946	2.599232017528616	2.0963929918779405	2.107644582480074	TRUE	FALSE	chr1_223100000_223700000	TAD_UP	1
ENSG00000116574	RHOU	activated	0.21723243809130635	0.7826760792353188	1.3872239151734884	1.3044553989511938	1.0322273786518454	0.8408270952435095	0.6452755609535503	TRUE	FALSE	chr1_228650000_229250000	TAD_UP	1
ENSG00000117594	HSD11B1	activated	0.6790360124912036	2.8219086809774057	1.7222242311801297	4.149374672074754	5.134288013154533	5.744172256553058	5.740300703441491	FALSE	FALSE	chr1_207800000_209850000	TAD_UP	1
ENSG00000162852	CNST	activated	-0.02832526112997946	0.12679853594684248	0.16977994270987892	0.3650724863308282	0.6019495259851576	0.6535160602481495	0.7943225929625146	FALSE	FALSE	chr1_245000000_246800000	TAD_UP	1
ENSG00000143842	SOX13	activated	0.02296078305714756	0.23433204280514533	0.7022463936630587	0.968476028891538	1.0727159685281753	0.9439397464027388	0.6224290840145547	TRUE	FALSE	chr1_203850000_204150000	TAD_UP	1
ENSG00000159388	BTG2	activated	0.5178877508889721	1.3142069982295357	1.2331549207809611	0.9770386767900826	0.7177244540835189	0.633927641450237	0.3912446060933649	FALSE	FALSE	chr1_203250000_203850000	TAD_UP	1
ENSG00000158764	ITLN2	activated	0.24643965285352432	1.6994926030459785	2.6427300172970916	2.6708854866322485	2.897907981891333	3.1823010684888495	2.056707872846467	TRUE	FALSE	chr1_160650000_161150000	TAD_UP	1
ENSG00000143514	TP53BP2	activated	0.03795786377863261	0.2244128424590953	0.5102795168950409	0.7620848903644586	0.5988571906469032	0.5930303301301055	0.5292876378387146	FALSE	FALSE	chr1_223800000_223900000	NA	NA
ENSG00000076356	PLXNA2	activated	-0.3881623869980764	-0.4476029330106941	0.3593877606724361	0.8906484102958787	1.4832665784026144	1.5398263080217245	1.2554460353897137	FALSE	FALSE	chr1_207800000_209850000	TAD_UP	1
ENSG00000143845	ETNK2	activated	0.08603541306482895	0.5313376842598567	1.7818206956879428	2.7408504575238783	2.926304020369352	3.19281442338402	3.279645125790646	TRUE	FALSE	chr1_204150000_204400000	TAD_UP	1
ENSG00000069812	HES2	activated	0.09669407705804262	0.3929767822579025	1.2002504532626463	1.743014600522161	1.9112786502199943	1.928333611005722	1.680921374501855	FALSE	FALSE	chr1_6200000_6450000	TAD_UP	1
ENSG00000235750	KIAA0040	activated	-0.2649573520785069	0.06373291525368491	-0.2902752475602559	0.4684438888762927	0.679907543264093	0.9531197342473444	0.7899804323216704	FALSE	FALSE	chr1_175000000_178000000	NA	NA
ENSG00000123689	G0S2	activated	0.03030170625294537	0.21028946265586196	-0.13232396260069443	0.5223770633569035	1.0411451765366535	0.8969401854883413	1.0763576453397543	FALSE	FALSE	chr1_207800000_209850000	TAD_UP	1
ENSG00000143858	SYT2	activated	-2.064704126706635	0.4516787013814896	3.41669581526517	5.476144625751202	5.699047610611308	5.3971727120897945	5.211433399652286	FALSE	FALSE	chr1_202150000_202750000	TAD_UP	1
ENSG00000180287	PLD5	activated	-0.26006767026487504	-0.06380280014964823	-0.01074073744357461	0.08090220062390586	0.33692210534552913	0.5694847112503173	0.9432202361802255	TRUE	FALSE	chr1_241500000_244850000	TAD_UP	0.75
ENSG00000230124	ACBD6	activated	0.03985842932187386	0.08915488374949901	0.7683038494236678	0.2876578817180983	0.18898440300969496	0.25775803846978473	0.15624180098211402	FALSE	FALSE	chr1_180500000_181200000	TAD_BALANCED	0.666666666666667
ENSG00000136636	KCTD3	activated	0.0568442001021158	0.33864247521213287	0.626761192088915	0.7689482414932125	0.7605784923192743	0.7255457152756529	0.6261093998820579	FALSE	FALSE	chr1_213050000_215650000	TAD_UP	1
ENSG00000163399	ATP1A1	activated	0.01036313926762803	0.29768783664500265	0.912264686058	1.0825371410394686	1.0712349625432007	1.1313073219988037	1.1068240779905096	TRUE	FALSE	chr1_116100000_116550000	TAD_UP	1
ENSG00000243364	EFNA4	activated	-0.10291145371878026	-0.05050111693166379	0.5429732779064458	0.8831647266590058	0.6169405323500495	0.3289205726162842	0.6342488423980382	FALSE	FALSE	chr1_155050000_155150000	TAD_DOWN	0
ENSG00000143590	EFNA3	activated	0.2106301757847121	0.3335710492782106	1.0663336080324586	1.159829347523791	1.5873906456163038	1.2146117584099756	0.9094405099458408	FALSE	FALSE	chr1_155050000_155150000	TAD_DOWN	0
ENSG00000163462	TRIM46	activated	-0.00329254489332449	-0.3090580326438532	0.30042096393925544	0.6518591258333267	0.9378500629105192	0.5721750430717046	1.007406763756212	FALSE	FALSE	chr1_155150000_155250000	TAD_UP	1
ENSG00000185499	MUC1	activated	-0.4313693740639125	0.02195686353193013	-0.290439777966527	0.08813380190498259	0.7022218651978057	0.7882359410681291	1.0710319344710564	TRUE	FALSE	chr1_155150000_155250000	TAD_UP	1
ENSG00000162641	AKNAD1	activated	-0.6600703288578653	0.12658836850760266	0.17359357220639302	1.533004217637964	1.7355057136953225	0.5904039503591589	0.579138867073838	FALSE	FALSE	chr1_108950000_109050000	NA	NA
ENSG00000237424	FOXD2-AS1	activated	-0.21642200957787225	0.2982449820704637	0.90489681020417	0.5885280370964787	0.48387599837691575	0.34160613563449443	0.503191414048123	FALSE	FALSE	chr1_47350000_48100000	TAD_UP	1
ENSG00000160691	SHC1	activated	0.09524857990812362	0.21395257135632748	0.22155117636723515	0.6188691671673696	0.6170200036089706	0.9065277065953472	0.9218150432406704	FALSE	FALSE	chr1_154950000_155050000	TAD_UP	1
ENSG00000158747	NBL1	activated	0.0085694617192843	0.07995181697405201	0.6542614980400947	0.879039482447435	0.8558951617288627	1.083362193214985	0.9924781273556847	TRUE	FALSE	chr1_19300000_19700000	TAD_UP	1
ENSG00000116690	PRG4	activated	0.19536223841983827	0.37116192969939527	0.5077557933218402	-0.0248699371609798	1.1030307125834218	1.217914339010941	1.1157722771768863	FALSE	FALSE	NA	NA	NA
ENSG00000168389	MFSD2A	activated	0.09777232594023604	0.3781235871352544	1.8140266407646448	2.014807684100574	2.0789849084459564	1.84796418235709	1.421662427982835	TRUE	FALSE	chr1_39800000_40050000	TAD_UP	1
ENSG00000182749	PAQR7	activated	0.04444309438091041	-0.2495923332098104	-0.2201418845049502	0.3755669545172324	0.5768785483573818	0.8949460549388549	0.841178251649389	TRUE	FALSE	chr1_25850000_26000000	TAD_UP	1
ENSG00000284770	TBCE	activated	0.3271572365519376	0.2632445705264016	-0.09496367996730531	0.23037322998531592	0.5434569697950631	0.7169026263475049	0.9425515861049064	FALSE	FALSE	chr1_235350000_235450000	TAD_UP	1
ENSG00000125459	MSTO1	activated	-0.15541946622356623	0.2399205341389541	1.0910742289781254	0.5362791683246104	0.3458257501772863	0.35955068523360556	0.343714027700601	TRUE	FALSE	chr1_155600000_155700000	NA	NA
ENSG00000162614	NEXN	activated	-0.11949641844444817	0.6007386132118113	0.929691383418791	1.6131832456672173	1.3490616340965187	1.397778757904947	1.3701789396275608	TRUE	FALSE	chr1_77800000_77900000	TAD_UP	1
ENSG00000163875	MEAF6	activated	0.03790015617454595	0.33257155689503337	0.6104691818546523	0.9390034726245252	1.0108254274976949	1.2927518326241971	1.1624161055648887	TRUE	FALSE	chr1_37450000_37550000	TAD_UP	1
ENSG00000198821	CD247	activated	0.30052237660173087	0.6685618249899739	1.566156585362716	2.1727941777835125	2.3636985999751605	2.1029628362200885	1.481748426307665	FALSE	FALSE	chr1_167200000_167550000	TAD_DOWN	0
ENSG00000162889	MAPKAPK2	activated	0.04740997933632781	0.2440205547702311	0.7044999058247261	0.781013064200671	0.6906901804199933	0.8158021913856639	0.6114398945095264	FALSE	FALSE	chr1_206600000_207050000	TAD_UP	1
ENSG00000182795	C1orf116	activated	-0.2684905657370321	0.21842927809159768	0.522140322860773	0.8521834680740997	1.2521505061781844	1.0573370714361825	1.044828067185886	FALSE	FALSE	chr1_206600000_207050000	TAD_UP	1
ENSG00000160712	IL6R	activated	0.23762092264536183	1.4538430973113006	2.522463993070311	2.6359349955397424	2.621713984790737	2.682039341418585	2.7331695792422286	FALSE	FALSE	chr1_154350000_154450000	TAD_UP	1
ENSG00000162426	SLC45A1	activated	0.23756294140850023	0.14317768963876149	1.2535651325129868	1.651233612900057	1.6020658255249176	1.9892641339820645	1.8067434471448724	TRUE	FALSE	chr1_7950000_8350000	TAD_UP	1
ENSG00000117245	KIF17	activated	0.09521273954251412	0.15729597865873146	0.7202040653276862	0.8904776887434133	1.1171938257360088	0.9054749404756024	1.1716352703351969	FALSE	FALSE	chr1_20650000_21200000	TAD_BALANCED	0.666666666666667
ENSG00000227496	NA	activated	-0.23974631522417228	0.5632142749020276	0.49972857885721206	1.4622448163737412	1.5090082009604084	2.0417326784310257	1.4708224940999688	TRUE	FALSE	chr1_225450000_226000000	TAD_UP	1
ENSG00000243709	LEFTY1	activated	-0.8311790025381225	0.2080283836356292	1.0912339688552215	1.9206672661635176	2.098080405519437	2.939302006034889	2.546827424948495	FALSE	FALSE	chr1_225450000_226000000	TAD_UP	1
ENSG00000117616	RSRP1	activated	-0.05579322096621277	0.1357579912033708	0.2182569865507789	0.6836485008927474	0.7780771305989375	0.6400037814725158	0.8603041211901714	FALSE	FALSE	NA	NA	NA
ENSG00000143382	ADAMTSL4	activated	0.2389194372757479	-0.11399071228941854	0.32854599757387254	0.6842502396679856	0.6806769819424475	1.006418823295377	1.3359184740727996	FALSE	FALSE	chr1_150450000_150550000	NA	NA
ENSG00000137942	FNBP1L	activated	0.0822249425985237	0.21764502344670264	0.6496287618867953	0.7818475396547272	0.8492201686330564	0.8035472581115436	0.7589035364767149	TRUE	FALSE	chr1_93300000_93900000	TAD_UP	1
ENSG00000180667	YOD1	activated	0.10195210101493	0.5423147188556745	0.12576245793027988	0.7778016123866378	0.8432049214926479	0.85847357625406	0.9533985058649096	FALSE	FALSE	NA	NA	NA
ENSG00000117643	MAN1C1	activated	0.5384671539628594	-0.10438093553379836	0.15146344647748072	1.67184224867144	2.6666339814260684	2.4119928372915966	2.7117650077464033	FALSE	FALSE	chr1_25350000_25850000	TAD_UP	1
ENSG00000188060	RAB42	activated	0.9632552542335427	0.6342187722769312	1.2550978367049823	1.9017635176689272	1.072369722051789	1.4099837430882918	1.248345286507465	FALSE	FALSE	chr1_28500000_28650000	NA	NA
ENSG00000116871	MAP7D1	activated	0.05286398743834882	0.07995669370637899	0.46020889364132395	0.9210233994248108	0.8762499086922892	1.0172480321173716	0.992003113682131	TRUE	FALSE	chr1_36050000_36450000	TAD_UP	0.75
ENSG00000189171	S100A13	activated	0.2845209404897394	-4.8648804359449263e-4	0.7843647582732753	0.5463433945244266	0.08005354808950035	0.026137434224791	-0.1048727612599338	FALSE	FALSE	chr1_153500000_153650000	NA	NA
ENSG00000214193	SH3D21	activated	0.1905202054843015	-0.3310215211912995	0.5819714300737184	0.8967423005568116	1.1013344039086148	0.9440435863012528	1.1052289961093718	FALSE	FALSE	chr1_36050000_36450000	TAD_UP	0.75
ENSG00000119771	KLHL29	activated	0.01703481621499107	-0.313945308704148	-0.25329750941607865	0.6928354814985823	0.9229561046208444	1.1736714768532632	1.2060530215456684	FALSE	FALSE	chr2_20650000_23750000	TAD_UP	1
ENSG00000143797	MBOAT2	activated	-0.02103058941197811	0.13160054878962477	0.2294943027459276	0.6527468375015696	0.7301844269250531	0.7534962382124275	0.8001391033028519	TRUE	FALSE	chr2_7050000_9150000	TAD_BALANCED	0.666666666666667
ENSG00000143867	OSR1	activated	0.17901186956358592	0.2234204455452513	0.4402813596722884	0.7684699219683251	0.5387515077521252	0.6035568539270693	0.5172230403170005	FALSE	FALSE	chr2_18350000_19950000	TAD_UP	1
ENSG00000115129	TP53I3	activated	0.02158444815200004	0.09655875103807096	0.4822723057987282	0.80504559073026	0.7584137111767554	0.652934268541469	0.6471089642630713	TRUE	FALSE	chr2_24050000_24150000	TAD_UP	1
ENSG00000143869	GDF7	activated	1.392267441117369	1.408666838741481	1.7741335871084956	2.542873315560874	2.7535240452861856	2.5669911024830605	2.660333098846849	FALSE	FALSE	chr2_20650000_23750000	TAD_UP	1
ENSG00000075426	FOSL2	activated	0.15723355455794008	0.5284936166942189	0.7577379241411061	0.9203456724757064	0.8383029477917854	0.9470828356149796	0.8663216254206406	TRUE	FALSE	chr2_27650000_28550000	TAD_UP	1
ENSG00000259439	LINC01833	activated	-0.14172549687117084	0.0165371268950824	0.5882634534980012	1.2663630675758584	1.2103532101391847	1.2616714416060215	1.1076239142592863	FALSE	FALSE	chr2_44400000_44950000	NA	NA
ENSG00000172974	VDAC2P5	activated	0.05201480619016178	0.4151083281086924	1.251388461698166	0.7050201571790619	0.3890092230669819	0.5421940369053023	0.4706021010874092	FALSE	FALSE	chr2_65200000_65600000	TAD_UP	1
ENSG00000152518	ZFP36L2	activated	0.172267376992467	0.4963983156985174	0.5965323306307392	0.7100835145901674	0.8617348154950671	0.9475077129553616	0.8017662063543958	FALSE	FALSE	chr2_42800000_43600000	TAD_UP	1
ENSG00000186854	TRABD2A	activated	0.24770443364302464	0.4551167910223551	0.5654341901678597	0.9883919450690968	0.5660246232827048	0.938390738276966	0.8151802671316971	TRUE	FALSE	chr2_84900000_85350000	TAD_UP	1
ENSG00000168890	TMEM150A	activated	-0.11647233012064284	0.28581075407492795	0.4996899507220833	0.30779290077838184	0.5877694158767768	0.5702982964740064	0.7553603979122712	FALSE	FALSE	chr2_85600000_86150000	TAD_UP	0.846153846153846
ENSG00000168906	MAT2A	activated	0.06077101882603632	0.564432053018753	0.6353452619528464	0.7877691983062607	0.8330606317307553	0.7867279800764524	0.8622411750863982	FALSE	FALSE	chr2_85350000_85600000	TAD_UP	1
ENSG00000170577	SIX2	activated	-0.4137574666611453	0.7370453312664839	1.554325292561855	2.1944328556194312	1.5579404957261191	1.9557431081012748	1.8995368072943808	FALSE	FALSE	chr2_44950000_45550000	TAD_UP	1
ENSG00000138083	SIX3	activated	0.09122144360658606	-0.12973938932146578	0.28150578596574843	1.6388986508520105	1.582556648996901	1.3284797732306208	1.3662542188161062	FALSE	FALSE	chr2_44400000_44950000	NA	NA
ENSG00000034510	TMSB10	activated	0.09343381234536828	-0.12367516916874072	1.1050469546608992	0.7391468356964831	0.3338645691554442	0.32354162826520066	0.41281170975282744	TRUE	FALSE	chr2_84900000_85350000	TAD_UP	1
ENSG00000168874	ATOH8	activated	0.07185796415503094	-0.2008339336543409	0.13641008344492211	1.1002480304533897	0.7748450532057691	0.9302328975291968	1.0457364248757055	FALSE	FALSE	chr2_85600000_86150000	TAD_UP	0.846153846153846
ENSG00000163803	PLB1	activated	0.00397315172548698	0.06788061518045169	0.3288185255707886	0.9976364127839942	0.7339817229840032	0.7845369382006961	0.6117447093405325	FALSE	FALSE	chr2_27650000_28550000	TAD_UP	1
ENSG00000287625	NA	activated	0.07988574163875298	0.7892737798892266	0.9820230173295488	1.0726687044303005	1.1334338842646356	1.0218995776010942	0.9897698323240416	TRUE	FALSE	chr2_84900000_85350000	TAD_UP	1
ENSG00000172985	SH3RF3	activated	0.18865330935276556	0.511047776963831	0.06168982311182431	1.4640517555054482	1.1509690021580916	1.2552346600162194	2.002486250192837	FALSE	FALSE	chr2_108850000_109550000	TAD_UP	1
ENSG00000240687	NA	activated	-0.3296810402487204	0.6227067044513505	1.5334037555460196	1.5250749037812656	2.4241976666261658	1.024629717265773	1.1668372864064214	TRUE	FALSE	chr2_9550000_9800000	TAD_UP	1
ENSG00000081320	STK17B	activated	0.06807545082999862	0.7739743112570119	1.287482463501004	1.733768584923122	1.7713930171854495	1.88118306023654	1.9500585096739032	FALSE	FALSE	chr2_196050000_196800000	TAD_UP	1
ENSG00000152292	SH2D6	activated	0.2822183061495162	1.2144974161910458	1.8840495547894065	1.1965007789287054	1.6440889553406637	1.5700252377372383	1.7635920161206586	FALSE	FALSE	chr2_85350000_85600000	TAD_UP	1
ENSG00000272807	NA	activated	0.31327094273010864	0.4700444075666691	-0.33745617807570044	0.2161741258435569	0.5687431035328087	0.5611634304411891	0.9521579142517032	FALSE	FALSE	NA	NA	NA
ENSG00000163083	INHBB	activated	0.24325579702711644	0.5528274658734464	0.97030259640525	0.9092622869916692	1.1083772018836031	1.0616097291553863	0.7930815585846848	FALSE	FALSE	chr2_119350000_121800000	TAD_UP	0.9375
ENSG00000135960	EDAR	activated	0.30316784248951834	0.3614409133623131	1.0432508770506164	1.1461938402706409	2.464547633488434	1.96572396740472	1.3058580421298558	TRUE	FALSE	chr2_108850000_109550000	TAD_UP	1
ENSG00000138356	AOX1	activated	-0.06138126835139477	0.08796785185303373	0.20673801671734948	0.6701116614680365	0.833336962915119	0.8684493749198827	1.141371221846999	TRUE	FALSE	chr2_199900000_200900000	TAD_UP	1
ENSG00000229056	HECW2-AS1	activated	0.01891765852076928	0.5841699420107159	0.981452002979011	2.044598887968784	2.131477527218614	1.2133068393676856	1.9711066101017432	TRUE	FALSE	chr2_196050000_196800000	TAD_UP	1
ENSG00000163082	SGPP2	activated	0.07247378972706	-0.5879346909499876	0.18346674523040543	0.8146076789820939	1.520159880339646	1.5686832328201203	1.7262949807420709	FALSE	FALSE	chr2_219550000_222650000	TAD_BALANCED	0.666666666666667
ENSG00000196872	CRACDL	activated	0.15167847977273763	0.19305685770348596	1.3512576934408724	2.2931045241023313	1.8944173525235943	2.191588978530601	1.8096859855459295	FALSE	FALSE	chr2_98600000_99100000	TAD_UP	1
ENSG00000272902	TBC1D8-AS1	activated	0.5761266698040873	0.44446810050678	1.7820025129040675	1.518058569874239	0.9906028602490838	0.9952922349686264	0.8053801523113696	FALSE	FALSE	chr2_101000000_101250000	TAD_UP	1
ENSG00000153208	MERTK	activated	-0.15444689605083803	-0.434790252404237	0.3247552535753355	1.0320666076624532	1.0259879759382444	0.6849802599387881	0.7645054282025571	FALSE	TRUE	chr2_111850000_112050000	TAD_UP	1
ENSG00000065413	ANKRD44	activated	0.02254061245137007	-0.11444965181096566	-0.20197443452289057	1.089103779265627	1.1644257708672336	1.3656364132414625	1.1969960358371154	FALSE	FALSE	chr2_197000000_197400000	TAD_UP	1
ENSG00000187699	C2orf88	activated	-0.09717080141829354	0.5253929635040141	1.0612036103544968	1.0965235110732034	1.0333637662915904	1.2112022327894738	1.0576495920277798	FALSE	FALSE	chr2_189650000_190850000	TAD_UP	0.833333333333333
ENSG00000183671	GPR1	activated	0.23593214999259032	2.110832437746164	3.0032578657972837	4.671871564353115	4.5448636448073785	5.145645548848199	5.3288499702798395	FALSE	FALSE	chr2_206150000_206300000	NA	NA
ENSG00000144445	KANSL1L	activated	0.04078132856361101	0.3272260880796297	0.40559233354103086	0.8547483525509911	0.935198210374912	0.7567924905295877	0.6099262924682617	FALSE	FALSE	NA	NA	NA
ENSG00000233757	NA	activated	0.5151426647119578	0.45130580831998063	1.189851361666745	0.635051861885183	0.6429487750267384	0.6570970156092669	0.4037567235365302	FALSE	FALSE	chr2_94850000_95450000	NA	NA
ENSG00000229647	MYOSLID	activated	-0.01793594142932301	-0.14064436505605316	0.7650152445044311	1.6272639275293173	1.660773588248074	1.73770035808293	1.768672208038243	FALSE	FALSE	chr2_206650000_207600000	TAD_UP	1
ENSG00000163171	CDC42EP3	activated	0.2176159290774518	1.1319003019560097	1.517760025645814	1.9759510142526433	1.9550708149313265	1.9152675368883736	1.8215105840901888	FALSE	FALSE	chr2_37350000_37900000	TAD_UP	1
ENSG00000073737	DHRS9	activated	0.45867649043647907	1.007046401843787	2.092991839920677	2.2489911035915418	2.392312307159266	2.2099980417887823	2.164234794675711	FALSE	FALSE	chr2_168950000_169250000	TAD_UP	1
ENSG00000208772	SNORD94	activated	-0.04717004509225569	0.09161729538744152	0.12161961766456512	9.32521661033739e-5	0.5449174725529699	0.5084023131942962	0.926040766674512	FALSE	FALSE	chr2_85600000_86150000	TAD_UP	0.846153846153846
ENSG00000068615	REEP1	activated	0.22000671075153905	-0.15596403626421224	0.23052655924687343	1.184898675832918	1.3760024728975433	1.5212093990679922	1.849102852510386	FALSE	FALSE	chr2_86150000_86400000	NA	NA
ENSG00000132326	PER2	activated	0.2305037280482594	0.9835399655610484	1.3029668680491364	0.8849804888422722	1.1653599661512757	1.2824120896932485	1.337457973245315	TRUE	FALSE	chr2_237800000_240550000	TAD_UP	0.875
ENSG00000163283	ALPP	activated	0.05803632412529055	2.5297989418156335	4.756479789446299	6.341825810526165	6.505200084432016	6.481816209273516	6.494463747556218	TRUE	FALSE	chr2_231750000_232550000	TAD_BALANCED	0.5
ENSG00000197329	PELI1	activated	0.02488551625300259	0.7592246927667681	0.9990546668242888	0.35271986409929273	0.45366987222434607	0.05610720522891798	0.01962823612406303	FALSE	FALSE	chr2_64000000_64550000	TAD_UP	1
ENSG00000075886	TUBA3D	activated	0	1.1074631430814823	5.15368138145817	6.494560752498166	6.779331367396141	6.444621427670722	6.351640046111526	FALSE	FALSE	chr2_130700000_134950000	TAD_UP	1
ENSG00000152086	TUBA3E	activated	0.7086585075207437	2.8132095484780284	4.300070523938774	6.114178149330442	5.996737502471426	6.142221901176253	6.6743408626620555	FALSE	FALSE	chr2_130100000_130400000	NA	NA
ENSG00000123977	DAW1	activated	0.12866208666619616	0.7530011860895308	1.1616861583644038	1.185704686616749	0.947837208084311	0.9963376080272606	1.3905098866051766	TRUE	FALSE	chr2_227600000_229800000	TAD_UP	1
ENSG00000153823	PID1	activated	0.02143154425698324	0.5646975425185295	0.2745422108850687	0.7953800831200054	0.8686044127009177	0.8654860528735332	0.7480632956276199	TRUE	FALSE	chr2_227600000_229800000	TAD_UP	1
ENSG00000115112	TFCP2L1	activated	0.2434235637926555	1.618767360468124	3.7870887151495105	4.5979574839779715	4.7752980619464225	5.175913832375702	5.17429610697331	TRUE	FALSE	chr2_119350000_121800000	TAD_UP	0.9375
ENSG00000115756	HPCAL1	activated	-0.07030321213574685	-0.12177509417669916	0.40586047688006505	0.8888480760922498	0.9088963525814988	1.1555821245477256	1.2693153175179814	FALSE	FALSE	chr2_10100000_10450000	TAD_UP	1
ENSG00000115758	ODC1	activated	0.16087755861641562	0.2945683145756838	0.6829785762716316	0.9651246189655204	0.6677066562388785	0.8648591757820852	0.7841647533654141	TRUE	FALSE	chr2_10100000_10450000	TAD_UP	1
ENSG00000072195	SPEG	activated	-0.07314613337430641	-0.20322127640714965	0.10890689247270396	0.7949232013825706	0.4449246890481112	0.11258961982671847	0.21817605362280584	FALSE	FALSE	chr2_219400000_219550000	NA	NA
ENSG00000115468	EFHD1	activated	0.215733630242116	-0.30107942077808925	1.02292793081917	0.7483516895924576	1.2198871105531657	1.2229726543249846	1.3327811244928711	FALSE	FALSE	chr2_232550000_233400000	TAD_UP	1
ENSG00000204634	TBC1D8	activated	0.0632809037797795	0.3981599190136847	1.1869144325783951	1.3988328115385469	1.5125770651991188	1.533705404604749	1.5799006967103304	FALSE	FALSE	chr2_101250000_102750000	TAD_UP	1
ENSG00000135899	SP110	activated	0.1079797416250746	-0.2831329077034094	0.33201889774281135	0.8494808669940207	0.73931819265174	0.7784545315131612	0.6066985106050088	FALSE	FALSE	chr2_229900000_230850000	NA	NA
ENSG00000115155	OTOF	activated	1.0505555742327508	0.13151490346913342	2.2855279750417004	2.792898707430046	2.3028004353998432	2.1552598207458256	2.548877930429456	FALSE	FALSE	chr2_26500000_26600000	NA	NA
ENSG00000197872	CYRIA	activated	0.7491040588957738	0.6011707898319165	1.6558405934644016	3.1225491893144617	2.9121433374312953	2.885579776525729	2.4925798836027804	FALSE	FALSE	chr2_11650000_18250000	TAD_UP	1
ENSG00000082438	COBLL1	activated	-0.1180211530498368	0.14971814957068025	0.31983083459749717	0.6955847968501646	1.0593907287768456	1.3109382094826798	1.395780410864994	FALSE	FALSE	NA	NA	NA
ENSG00000173559	NABP1	activated	0.02666282501157567	0.13208304048343217	0.11130672805141029	0.01434783281640397	0.2182164089273115	0.5042071726858979	0.7854211335129488	FALSE	FALSE	chr2_191550000_191750000	TAD_UP	1
ENSG00000013441	CLK1	activated	-0.03862689493839773	0.5663011126819899	0.6083380972921589	0.5881349516832401	0.6927233003096132	0.7884599049529181	0.9358788945035356	FALSE	FALSE	chr2_199900000_200900000	TAD_UP	1
ENSG00000152527	PLEKHH2	activated	-0.03954176236257459	0.21435346239278943	0.45294440042138506	0.39722147109060835	0.815625737821882	0.2852322313416961	0.3941412574489294	FALSE	FALSE	chr2_43600000_43900000	TAD_UP	1
ENSG00000079308	TNS1	activated	0.08810265060752914	-0.09810382857550878	0.3887025512462079	0.6554882290945725	0.6630460035976533	0.959217174206439	0.7535268746993415	FALSE	FALSE	chr2_216500000_218200000	TAD_UP	1
ENSG00000163359	COL6A3	activated	0.5360168713661471	1.152822953107017	0.5875219245389061	1.339837016024159	0.999201438331936	1.4619852980618957	1.9350793501095651	FALSE	FALSE	chr2_237100000_237600000	TAD_UP	1
ENSG00000172071	EIF2AK3	activated	0.05189901497431125	0.36871159284490823	0.9703398032810118	1.1497857465663994	1.168881198086592	1.2072579777568548	1.2645838628382726	FALSE	TRUE	chr2_88000000_88800000	TAD_BALANCED	0.666666666666667
ENSG00000030419	IKZF2	activated	-0.0960561693964562	-0.06211744942756363	0.26373897031301735	0.8353835854516917	0.9565477332203156	1.3512902136840923	1.3216113771178908	FALSE	FALSE	chr2_212600000_216000000	TAD_UP	1
ENSG00000078018	MAP2	activated	0.01587065412723142	-0.198773957295461	-0.17403821711327297	0.35121194897056845	0.5248988428380141	0.7832238754503222	0.8115768503051646	FALSE	FALSE	NA	NA	NA
ENSG00000155744	FAM126B	activated	0.01480967835999651	0.29095874036975833	0.11974695630256683	0.3937456547359932	0.4860049596289049	0.661733499445158	0.904255122632318	FALSE	FALSE	chr2_200900000_201200000	TAD_UP	1
ENSG00000163576	EFHB	activated	-0.3300919533832623	0.26962140165143655	0.2859871679460246	0.4982107038148784	0.4180044515063625	0.6124339710766693	0.912200669703035	FALSE	FALSE	chr3_18550000_22200000	TAD_UP	1
ENSG00000235904	RBMS3-AS3	activated	0.21298210598771025	0.6440728090272925	1.3009265871454316	1.4631803643759462	1.4935133611514644	1.269034708784236	1.519963044794474	TRUE	FALSE	chr3_28450000_32500000	TAD_UP	0.916666666666667
ENSG00000182247	UBE2E2	activated	-0.02501840707657501	0.10415147939345316	-0.04580270462921369	0.4290557040390258	0.4124444101814212	0.5898046170495911	0.7605856306571047	FALSE	FALSE	chr3_22900000_23950000	TAD_UP	1
ENSG00000196220	SRGAP3	activated	-0.3976580041458203	-0.3279691096127563	-0.05728110618493407	0.5124411924291284	0.8868993826702611	1.101832794806921	0.9375063206011572	FALSE	FALSE	chr3_8450000_15600000	TAD_UP	0.833333333333333
ENSG00000144655	CSRNP1	activated	-0.06861982709693883	0.13314888509615713	0.673070940202571	0.7756406494843662	0.4950704412434083	0.4703907556585829	0.4000575826635936	FALSE	FALSE	chr3_39050000_39400000	TAD_UP	1
ENSG00000144642	RBMS3	activated	0.04565645270037594	0.43228505555338015	0.16844768777675473	0.8702207585181958	0.7966136788882928	1.6492313496567956	1.717308671138076	FALSE	FALSE	chr3_28450000_32500000	TAD_UP	0.916666666666667
ENSG00000268279	NA	activated	0.16635550301104118	0.9895409095770002	0.9418926024674014	1.2341791228232173	1.1861855906442222	1.16965981676967	1.4090869292655566	FALSE	FALSE	chr3_8450000_15600000	TAD_UP	0.833333333333333
ENSG00000144677	CTDSPL	activated	-0.00846143171931669	0.10942714601783649	0.5458245201222581	0.827263855183226	0.8936104140111616	0.9701179236158682	0.7339552326405281	FALSE	FALSE	chr3_37850000_38000000	TAD_UP	1
ENSG00000157445	CACNA2D3	activated	0.38102445782683025	0.9709176435249643	1.1512653151992227	3.256513415988665	4.107127456326463	3.781786752113291	4.044982799769911	FALSE	FALSE	chr3_53900000_56550000	TAD_UP	1
ENSG00000163376	KBTBD8	activated	-0.21838722446647135	0.33031576107949717	0.2244606721485201	0.4954582630582246	0.6622405302500782	0.8657075164954895	1.011488655154974	FALSE	FALSE	chr3_66850000_69000000	TAD_UP	1
ENSG00000173706	HEG1	activated	-0.01546831030517122	0.5315166538033687	0.93296781574731	1.5128827052451492	1.2710879757537012	1.3769844111467635	1.1861856985674455	TRUE	FALSE	chr3_124900000_125600000	TAD_UP	1
ENSG00000174738	NR1D2	activated	0.03211810559253829	0.5039788278111021	1.3697831540754688	1.459554009923437	1.267761177132196	1.053620217311912	0.756123495849478	FALSE	FALSE	chr3_22900000_23950000	TAD_UP	1
ENSG00000001617	SEMA3F	activated	-0.02535830185624502	-0.26197035803057317	0.1768098440909642	0.5672464876183149	0.5073707580160325	0.7582338533078512	0.5776241368398352	FALSE	FALSE	chr3_50100000_50250000	NA	NA
ENSG00000158234	FAIM	activated	0.05904477034425835	0.5620981844468398	0.76674767930953	1.07689150525287	1.084051276799168	1.3041003697940576	1.4144653055013532	FALSE	FALSE	chr3_138300000_138950000	TAD_UP	1
ENSG00000203644	NA	activated	0.02746695421143418	0.5254915541203444	0.5734399705945354	0.7652787610653207	0.8411744714414662	0.9684011561182158	0.9210300351519084	FALSE	FALSE	chr3_129300000_130150000	TAD_UP	1
ENSG00000114107	CEP70	activated	-0.03492309938114026	-0.06655107177170179	0.1652356972995974	0.5706137064220125	0.6612909132017626	0.9652726651964416	1.2405584762835415	TRUE	FALSE	chr3_138300000_138950000	TAD_UP	1
ENSG00000158163	DZIP1L	activated	-0.09697792794474784	0.0062366461642708	0.756186136996739	0.704758203160726	0.6312525530861987	0.5009142006185427	0.7014759219537693	TRUE	FALSE	chr3_138050000_138150000	TAD_UP	1
ENSG00000114790	ARHGEF26	activated	0.05744037224165734	0.14376879474663343	0.9136705155559112	1.3759953128498008	1.322027686297336	0.9971692850724184	0.6451491733169605	FALSE	FALSE	chr3_152600000_154300000	TAD_UP	1
ENSG00000224831	TMEM183B	activated	0.02173799750063104	-0.3665757743048849	0.7785260120975697	0.12572565574417385	0.07665104505942573	-0.1616070123386272	0.3118329017852447	FALSE	FALSE	chr3_149950000_150200000	NA	NA
ENSG00000244128	LINC01322	activated	-0.137221462460364	0.37906947970977695	0.46572198485922295	1.0844780129442413	0.978874683133076	0.7523530338758634	0.9512727173283876	FALSE	FALSE	NA	NA	NA
ENSG00000114098	ARMC8	activated	0.01109682333504597	0.1841968488831852	0.5512454157236583	0.9258112196117976	0.8336246087484854	0.9409527765750004	0.9243241023759916	FALSE	FALSE	chr3_138150000_138300000	NA	NA
ENSG00000168811	IL12A	activated	-0.08054111589750167	1.0132040043136434	1.0585905442339432	0.663916606756585	0.7840290663130095	0.7925063416148039	1.4616745172782333	TRUE	FALSE	chr3_158650000_160550000	TAD_UP	0.888888888888889
ENSG00000197415	VEPH1	activated	-0.8749104794338384	-1.6209864415209627	0.6560689413417078	1.3995923156647527	1.2767856067214978	1.6617316293123912	1.7039653186387906	FALSE	FALSE	chr3_157500000_158650000	NA	NA
ENSG00000113924	HGD	activated	0.05337688312002225	-0.06342855767737036	0.08115895704456279	0.15772113848567937	0.6099583401107774	0.7605017768659689	0.8398839183077218	TRUE	FALSE	chr3_120600000_120800000	TAD_UP	1
ENSG00000240875	LINC00886	activated	-0.26504193546655164	-0.08848206923733738	0.3736120308535017	0.774376008104114	0.9940588220748142	0.8461599602157007	0.7611348165763204	TRUE	FALSE	chr3_155950000_157200000	TAD_UP	1
ENSG00000113916	BCL6	activated	0.17856354023869883	1.116273013864265	0.8458554335451701	0.4396288449458992	0.6977110221957373	0.6149707155721078	0.4889175136210622	TRUE	FALSE	chr3_187700000_189250000	TAD_UP	1
ENSG00000161267	BDH1	activated	0.0888649651999165	-0.01735583121531702	-0.03837313882759301	0.5845176715216727	0.7576134162747311	0.6959618840930238	0.4069780090019125	FALSE	FALSE	chr3_197200000_197650000	TAD_UP	1
ENSG00000214135	NA	activated	0.04647730249993941	0.26487044217849154	0.2420032707975126	0.49301081899631105	0.6218958388604264	0.5010758439724786	0.7684057257477371	FALSE	FALSE	chr3_197200000_197650000	TAD_UP	1
ENSG00000189058	APOD	activated	0.2502434518804798	0.22072506940077985	1.538471456963311	0.7666100613978931	1.5304689706207937	1.482649592731552	0.9947020514836472	FALSE	FALSE	chr3_195500000_195600000	NA	NA
ENSG00000229619	MBNL1-AS1	activated	-0.06589093120114464	0.7225346473462131	0.5790443225481624	0.8293239770221418	0.7822180135347051	0.7489004238798519	0.6284005375428231	TRUE	FALSE	chr3_151150000_152600000	TAD_UP	0.833333333333333
ENSG00000170876	TMEM43	activated	-0.01672433693382755	0.21731913868055544	0.5863395905933445	0.7984426265326514	0.883033003097236	1.006418507978906	0.980355875174136	TRUE	FALSE	chr3_8450000_15600000	TAD_UP	0.833333333333333
ENSG00000198585	NUDT16	activated	-0.05135133735261636	0.1042597885389313	0.22722718655403065	0.5113994900363024	0.6344642888937896	0.8499865293586791	0.7677939319710056	FALSE	FALSE	chr3_131000000_132400000	TAD_UP	1
ENSG00000175182	FAM131A	activated	0.25557754489097373	0.4209710251262266	0.2369975029913892	0.8086902156846075	0.2891774249575892	0.4619097890047732	0.42565823611525694	FALSE	FALSE	chr3_183850000_184350000	TAD_UP	1
ENSG00000160801	PTH1R	activated	-0.01531709607962668	-0.5806921673760067	1.4968229069622594	2.2814516878950477	1.663961104156573	2.6641551721757244	2.0645909289496926	FALSE	FALSE	chr3_46650000_47400000	TAD_UP	1
ENSG00000160796	NBEAL2	activated	0.09185418497475684	0.10258048671863132	0.4830878617067874	0.9091455884201534	1.041766824358555	1.168206482097057	1.2893760211676657	TRUE	FALSE	chr3_46650000_47400000	TAD_UP	1
ENSG00000236409	NRADDP	activated	0.6484831277216236	1.0637697056670825	2.076880322418087	1.9335674959859608	2.0028333950015544	1.83050430525375	2.0243393837428196	TRUE	FALSE	chr3_46650000_47400000	TAD_UP	1
ENSG00000185112	FAM43A	activated	0.30800612548423795	1.0360433349852889	1.796057944210361	2.027481777823866	2.1688541284389116	2.0669495333651335	2.2748858438304236	FALSE	FALSE	chr3_194650000_195300000	TAD_UP	1
ENSG00000018408	WWTR1	activated	0.03552493174199612	0.3900936424277698	0.4557840460980335	0.784045727237381	0.8606354783234746	0.8675550186692143	0.7614540535442448	FALSE	FALSE	chr3_149500000_149750000	TAD_UP	1
ENSG00000144749	LRIG1	activated	0.0408006975392419	-0.15199589173599226	0.5319244578682394	0.7856498485476093	0.7325766875785636	0.49832404258386	0.03940825875549734	FALSE	FALSE	chr3_66250000_66850000	TAD_UP	1
ENSG00000164086	DUSP7	activated	-0.05961270245461476	0.38101398882361504	0.7855111445899339	0.8202531309466287	0.8326727948087644	0.8895849264661685	0.8101528757413303	FALSE	FALSE	chr3_52000000_52150000	NA	NA
ENSG00000163884	KLF15	activated	1.638614155544674	3.5780426093069684	7.077355660843768	8.075279327144218	7.500647048014284	7.449817874893518	6.56534789611997	FALSE	FALSE	chr3_125900000_126500000	TAD_UP	1
ENSG00000178035	IMPDH2	activated	0.13423980086211543	-0.1216838731963462	0.7517365165969682	0.4120735204780387	0.01411035142882349	0.09453692633537485	-0.04314892813523403	FALSE	FALSE	chr3_48950000_49050000	NA	NA
ENSG00000233276	GPX1	activated	-0.03703632104831449	-0.08551168160954614	1.2726139191188377	0.34132114605404856	-0.14791730100905257	-0.20375082264699015	-0.02261527924017687	FALSE	FALSE	chr3_49050000_49500000	TAD_DOWN	0
ENSG00000136521	NDUFB5	activated	-0.06662471599936969	-0.03370012701351353	0.7701867720567047	0.1935138319542704	0.02393885301702402	0.2421746570784153	0.3920551878152547	FALSE	FALSE	chr3_179600000_179800000	NA	NA
ENSG00000114812	VIPR1	activated	0.12500808644433434	0.23506248620992143	1.5680734090533028	2.340678082190401	2.673388176080312	2.999635225010912	3.0149079226678266	FALSE	FALSE	chr3_40200000_42550000	TAD_UP	1
ENSG00000163702	IL17RC	activated	-0.158670141913975	-0.20941315219556675	0.49599385190233225	0.7853977375685325	0.5881374938999911	0.8858456049107879	0.8682752993131303	FALSE	FALSE	chr3_8450000_15600000	TAD_UP	0.833333333333333
ENSG00000163932	PRKCD	activated	0.03103784679659428	-0.02660407272617102	0.9263395252006992	1.4052362138160377	1.4982964630452211	1.5552962494382676	1.546070239423941	TRUE	FALSE	chr3_53100000_53900000	TAD_UP	1
ENSG00000196428	TSC22D2	activated	0.17996955022749708	0.7660896204963008	0.5578349070962223	0.66202393754512745	0.7398482011198001	0.7969674004512104	0.9158483879756036	FALSE	FALSE	chr3_150200000_150550000	TAD_UP	1
ENSG00000172771	EFCAB12	activated	0.10091659702392022	0.13840390273621853	1.0709792250517896	1.506210901897092	1.340475787233071	1.064880122433709	0.8454468702814218	TRUE	FALSE	chr3_129300000_130150000	TAD_UP	1
ENSG00000163993	S100P	activated	-0.06985953798138468	0.3303180464179523	1.180228691549538	1.3824880671030442	1.3849410322926363	1.920738520786383	2.0822437669173848	TRUE	FALSE	chr4_6600000_6700000	TAD_UP	1
ENSG00000170871	KIAA0232	activated	0.04177571609375753	0.30110898883931664	1.0508033300440591	1.1516381524821688	1.1775751573231692	1.1377675564490948	1.0238318946294134	FALSE	FALSE	chr4_6700000_7100000	TAD_UP	1
ENSG00000170846	NA	activated	-0.00346760209070705	0.22940296208164157	0.8144315080212489	0.6495182931182654	0.6580039040392163	0.7880482830499113	0.604350009064619	FALSE	FALSE	chr4_6600000_6700000	TAD_UP	1
ENSG00000287099	NA	activated	3.0971072053467834	4.058178053359872	3.0418481758579214	4.48601808135272	5.0029175687881775	3.847548047186868	5.187577262015635	TRUE	FALSE	chr4_1900000_3050000	TAD_UP	1
ENSG00000163697	APBB2	activated	-0.00675325002215238	0.11047316501844948	-0.01660046129780383	0.5897950730317812	0.6893678512005575	0.9027784866565224	1.0085096757239345	FALSE	FALSE	chr4_40900000_41250000	TAD_UP	1
ENSG00000178597	PSAPL1	activated	0.6629321208363774	1.4436655820204478	1.8291439484228844	3.089393512820285	3.3036959883358388	3.3604550700677467	2.83161883414492	FALSE	FALSE	chr4_7100000_8200000	TAD_BALANCED	0.5
ENSG00000186222	BLOC1S4	activated	0.21823046010242617	-0.11834990198203003	0.9316879340853084	0.6464772131103425	0.3620636702105608	0.46275077667605474	0.5924140092024424	TRUE	FALSE	chr4_6700000_7100000	TAD_UP	1
ENSG00000162840	MT2P1	activated	-0.375278749368267	0.2935861937064608	0.6258147395914355	1.8368735221611356	1.7576379142968677	2.3095587625898006	2.42358849678379	FALSE	FALSE	chr4_68250000_69700000	TAD_UP	1
ENSG00000173597	SULT1B1	activated	-0.22477111623350943	0.9429069829147853	0.27573475424230376	1.1425452709457808	1.3741709078989104	1.2992553469171868	1.6293678599028136	FALSE	FALSE	NA	NA	NA
ENSG00000138771	SHROOM3	activated	-0.01285468826510982	0.3338704422052076	0.8843981523219355	1.141521930693716	1.3461060429397849	1.5541917717729263	1.4484545523476036	FALSE	FALSE	chr4_76100000_77350000	TAD_UP	1
ENSG00000287037	NA	activated	0.17152314162574436	0.3660653324100277	-0.3451767127260997	-0.15884354915859608	0.6855589080182318	0.586329777311305	0.9453058569204004	FALSE	FALSE	chr4_73550000_74200000	TAD_UP	1
ENSG00000138678	GPAT3	activated	0.04516360096948887	0.3410144347638647	0.9725521729262788	0.40888029156078687	0.34202576818057745	0.35715873819542404	0.4211698918379443	TRUE	FALSE	chr4_83450000_83650000	TAD_UP	1
ENSG00000170153	RNF150	activated	0.03457752639955273	-0.1000154569767286	-0.1752354951154382	0.11064535336881058	0.2463463767680576	0.987440830149622	1.0742088798163614	FALSE	FALSE	chr4_140850000_143550000	TAD_UP	0.888888888888889
ENSG00000171560	FGA	activated	0.29475185203540016	0.14349786294342562	0.5017569238145164	0.3967273148422196	0.8354092689621501	1.1291895450930984	1.226711193360189	TRUE	FALSE	chr4_154550000_154650000	TAD_UP	1
ENSG00000248187	NA	activated	0.4396000981277885	0.3654999374712158	0.8416359246228302	1.3014522242298885	1.1438097483365377	1.2967656364604403	1.2199368780992126	FALSE	FALSE	chr4_128150000_128900000	TAD_BALANCED	0.6
ENSG00000052795	FNIP2	activated	0.13785188196154374	0.5684618017151342	1.08879491192073	1.4253997059103545	1.1749828618965583	1.1786960475612267	0.8735586359956263	FALSE	FALSE	chr4_158650000_159450000	TAD_UP	1
ENSG00000154556	SORBS2	activated	-0.3909379989046973	-1.1985427801556037	-0.3803603633259585	1.0056803604418505	0.8404430202429138	1.3566716827760832	1.699931849083912	FALSE	FALSE	chr4_185400000_186150000	TAD_UP	1
ENSG00000145431	PDGFC	activated	-0.050738542234911	0.3298973196674659	0.31565981479833627	0.5347809472647134	0.6088405870009669	0.5943901863081946	0.783941953311719	FALSE	FALSE	chr4_155950000_157250000	TAD_UP	1
ENSG00000272870	SAP30-DT	activated	0.43462371819689294	1.413229950437852	1.1708049193693375	1.5327462735851771	1.648209566113663	1.610962289835391	1.0845917559007765	FALSE	FALSE	chr4_173300000_173400000	NA	NA
ENSG00000004468	CD38	activated	-0.11097598471032306	0.25378064746406437	0.3450047951545077	0.08020511938447912	0.7700831280383811	0.8208101704506887	1.018958904676135	TRUE	FALSE	chr4_15700000_16300000	TAD_UP	0.8
ENSG00000007062	PROM1	activated	-0.910854869075194	0.01113673582605163	1.371222960801019	2.9652113940347578	3.0357248115676128	3.4296569183662187	3.7641372739261	FALSE	FALSE	chr4_15700000_16300000	TAD_UP	0.8
ENSG00000287262	NA	activated	-0.5428801471130177	0.27531087740367344	1.7970126350956497	0.750312395635143	1.848296412066339	1.4837713660161356	1.5698472115611806	FALSE	FALSE	chr4_39450000_40000000	TAD_UP	1
ENSG00000137462	TLR2	activated	-0.22141294389476265	-0.5586931733323304	-2.1782439726821257	2.1159431218317333	1.2934928283328588	2.258130279937067	1.981407798208905	FALSE	FALSE	chr4_152800000_153750000	TAD_UP	1
ENSG00000168743	NPNT	activated	0.06679246299360758	0.4223365693386807	0.5735508551849007	0.8404147066052158	0.5383450888018025	0.8425827260402404	0.9659797744357168	FALSE	FALSE	chr4_105700000_106150000	NA	NA
ENSG00000171564	FGB	activated	0.26067722864878	0.344204022934269	0.6274383907204716	0.2886110265458651	0.5110481951524554	1.0911058591298046	1.1195844908122163	TRUE	FALSE	chr4_154550000_154650000	TAD_UP	1
ENSG00000196159	FAT4	activated	0.05746587937589145	0.5461923022755747	0.7629370041048402	1.1613443732370237	0.8950767029745916	1.1759808828161764	1.116032502145362	FALSE	FALSE	NA	NA	NA
ENSG00000151726	ACSL1	activated	0.02874756278273262	0.360889472674552	0.9298614812688082	1.8687043687998144	2.034099348306529	2.6265424556860917	2.754242482931578	FALSE	FALSE	chr4_184650000_185150000	TAD_UP	1
ENSG00000287692	NA	activated	3.0619232127818443	4.568448420285641	5.152481997476301	5.184131627547936	6.695068451423951	5.330781182972039	6.353322200377086	TRUE	FALSE	chr4_122600000_122950000	TAD_UP	1
ENSG00000163995	ABLIM2	activated	0.9608536784568208	-0.26554092640831856	0.41032212438695626	2.423786890167868	2.4698413784496993	3.4187533448085032	3.621893944254387	FALSE	FALSE	chr4_7100000_8200000	TAD_BALANCED	0.5
ENSG00000180346	TIGD2	activated	0.3347070032779601	0.7621154734698312	0.6442957244017231	0.39054063773545794	0.3259371660503499	0.15812539920101956	0.10742126087602018	TRUE	FALSE	chr4_88500000_89150000	TAD_UP	1
ENSG00000137460	FHDC1	activated	-0.06818990411395191	0.686397056748664	1.7754518320822934	1.32783787551925	1.1242565802392612	0.6318146333858338	0.0919309340478967	FALSE	FALSE	chr4_152800000_153750000	TAD_UP	1
ENSG00000248971	KRT8P46	activated	0.6546625028538392	0.3105863098187345	1.1676289110751603	1.3570049975577163	0.7603679842277336	1.7607740809335457	1.0906792692210512	FALSE	FALSE	chr4_99900000_103150000	TAD_UP	1
ENSG00000118804	STBD1	activated	0.7180522616749158	0.6209752502379371	1.641676891541138	1.7793319531041276	1.7867033581974436	1.621124217068055	1.3442616254086832	FALSE	FALSE	chr4_76100000_77350000	TAD_UP	1
ENSG00000125089	SH3TC1	activated	0.17392171926876226	0.20301009454519983	1.090595110671691	1.5181492567523374	1.6191022958490615	1.6546882613208609	1.641617113037771	TRUE	FALSE	chr4_7100000_8200000	TAD_BALANCED	0.5
ENSG00000168824	NSG1	activated	0.2643504094962975	0.3959119220910528	3.2745821072632975	4.910136193747293	4.596434730854441	5.0288966001115885	5.082729722060418	FALSE	FALSE	chr4_3950000_6600000	TAD_BALANCED	0.5
ENSG00000164023	SGMS2	activated	0.09391582496197184	0.3707434613435472	0.19133138156839488	0.5625234621715973	0.7813191864656752	1.1453645014132177	1.2635446825434014	FALSE	FALSE	chr4_107750000_107950000	TAD_UP	1
ENSG00000174358	SLC6A19	activated	1.2634224872557962	1.609272817321006	5.424905588912332	6.623122050295572	6.588323837084983	6.729809674542408	6.563729767536486	TRUE	FALSE	chr5_1200000_1650000	TAD_BALANCED	0.666666666666667
ENSG00000145569	OTULINL	activated	0.02717107975851602	0.7795471284872513	1.9497564226278097	3.153944200902646	3.329000309578385	3.838851942494141	4.023612198847169	TRUE	FALSE	chr5_14400000_14650000	TAD_UP	1
ENSG00000272086	GOLPH3-DT	activated	0.17388174969601322	0.6809375896256074	1.0613672631330042	1.2846415427540114	1.352877268694687	1.1430674472838749	1.2501474716060417	FALSE	FALSE	chr5_32100000_32350000	TAD_UP	1
ENSG00000213949	ITGA1	activated	0.24584068468649892	0.1718262094658608	0.1455739287941296	0.5018527865081053	0.4241112285407555	0.7220023685405931	0.7866593209556325	FALSE	FALSE	chr5_52750000_55150000	TAD_UP	0.8
ENSG00000133401	PDZD2	activated	-0.42220380091835746	0.537604487433872	1.291564994521146	2.693730035552044	3.075418031962785	3.5400896824405494	3.4961799704393464	FALSE	FALSE	chr5_31550000_32100000	TAD_UP	1
ENSG00000173221	GLRX	activated	0.14291016896703074	0.16803677418935214	0.5715704212130159	0.5832199622247152	0.6913524841318368	0.7950977105859369	0.7846101179244944	FALSE	FALSE	chr5_95550000_97200000	TAD_UP	1
ENSG00000113384	GOLPH3	activated	0.00828908446656572	0.2656309309846347	0.434194871770793	0.7240932901035873	0.7686497926773492	0.7862543477714772	0.8274513756388597	FALSE	FALSE	chr5_32100000_32350000	TAD_UP	1
ENSG00000134352	IL6ST	activated	0.1026006747842939	0.43071788269421296	0.3764793314854142	0.6279159665524248	0.6975123105402011	0.8536611932150673	0.9859137334112767	FALSE	FALSE	chr5_55150000_57250000	TAD_UP	0.8
ENSG00000270133	NA	activated	1.7103029774477252	1.26127328444866	1.6688659682367617	2.033899675722854	1.7132151466975776	1.274902012380537	1.9903249535976	FALSE	FALSE	chr5_91400000_94950000	TAD_UP	1
ENSG00000155324	GRAMD2B	activated	0.08597368321367302	0.4050181545894271	0.05949297701550461	0.8366652238232696	0.7301722179517439	0.2921587500701594	0.49234963114561686	FALSE	FALSE	chr5_123600000_126600000	TAD_UP	1
ENSG00000233006	MIR3936HG	activated	0.12579198447382076	0.04698662365644907	0.5110210979523508	0.844899024818252	0.9593094794483512	0.9077093100531476	1.1805040200766266	FALSE	FALSE	chr5_132250000_132400000	TAD_UP	1
ENSG00000129595	EPB41L4A	activated	-0.09574440835163588	0.00781414588871805	0.5891492349314094	0.830938292047143	1.314324268999953	1.4256953457291737	1.3683413536981082	TRUE	FALSE	chr5_112150000_112500000	TAD_UP	1
ENSG00000145687	SSBP2	activated	0.09069544752289382	-0.2412028941977534	-0.01910985565837578	0.4281052536892172	0.3871505026412398	0.7952697118550095	1.0302534522559803	TRUE	FALSE	chr5_81300000_82300000	TAD_UP	1
ENSG00000164251	F2RL1	activated	0.16724584300234346	0.6848963901006515	0.7725272875014362	0.8756412244654189	1.0399208570725216	1.115781147956681	1.1890354529372666	TRUE	FALSE	chr5_76600000_76850000	TAD_UP	1
ENSG00000112972	HMGCS1	activated	0.01340062912628765	0.6236904099859927	0.5511975360679491	0.625000375480052	0.869707468699093	0.8808968894672714	0.8699235164267142	FALSE	FALSE	chr5_42900000_43600000	TAD_UP	1
ENSG00000164292	RHOBTB3	activated	0.07096878094218016	0.32867942826490243	0.1764728337291165	0.5811313219543099	0.6690834287342727	0.8606912712573643	0.8932783546666186	FALSE	FALSE	chr5_95550000_97200000	TAD_UP	1
ENSG00000145675	PIK3R1	activated	-0.02450947940557978	0.12163221923703892	0.1580857179775123	0.7050037171456545	0.7249680867109866	0.9240828302329936	0.9256359386866604	TRUE	FALSE	chr5_66150000_69050000	TAD_UP	0.909090909090909
ENSG00000145685	LHFPL2	activated	-0.0153127648668835	0.2344249431638261	0.6205200122872617	0.8461278829774901	0.8438303635747404	0.6836291731202072	0.5180475136428601	FALSE	FALSE	chr5_78300000_79000000	TAD_UP	1
ENSG00000157510	AFAP1L1	activated	-0.03978033437965066	-0.02706656618832291	0.1657024481853635	0.855378448677861	0.9186197691883092	0.9688061263786708	0.8756755456520753	FALSE	FALSE	chr5_148400000_149300000	TAD_UP	1
ENSG00000155846	PPARGC1B	activated	0.2438964225609514	0.42749291693099856	1.5831745996013726	2.0783207834936697	2.3591831453219685	2.4939438954326434	2.327361185316409	FALSE	FALSE	chr5_149600000_149850000	TAD_UP	1
ENSG00000155850	SLC26A2	activated	0.07131599101502545	0.3365098490464747	0.6070114835273142	0.9537954821584024	0.848098946465561	1.05288596563716	1.020137851231565	TRUE	FALSE	chr5_149850000_150000000	TAD_UP	1
ENSG00000244968	LIFR-AS1	activated	0.8013259878633433	0.4186895988296833	0.3795729883847122	0.77080626527003	0.7634925084666809	0.863964517109141	1.1861206906694983	TRUE	FALSE	chr5_38350000_38950000	TAD_UP	1
ENSG00000132915	PDE6A	activated	-0.24536372136908788	0.11401126301564464	0.4500097548544925	1.0506901887700808	1.0208401272020895	1.227092301574627	1.1333670792368775	FALSE	FALSE	chr5_149850000_150000000	TAD_UP	1
ENSG00000113196	HAND1	activated	0.9076916371435044	0.8822837468909736	1.5642042970843535	3.064465741207476	2.832228542339367	3.59077089387829	3.541577142057755	TRUE	FALSE	chr5_154000000_154650000	TAD_UP	1
ENSG00000118985	ELL2	activated	0.01329591514904134	0.8733560797487203	1.3196923043648932	1.4215800118101818	1.2840376518690193	1.2277696890272685	1.114270129550694	TRUE	FALSE	chr5_95550000_97200000	TAD_UP	1
ENSG00000230551	NA	activated	0.2631740334841455	0.41508064342395407	0.5135811014228305	0.7064462788836735	0.8732738804969351	0.7816602687569769	1.076468906362432	FALSE	FALSE	chr5_149300000_149600000	TAD_UP	1
ENSG00000113594	LIFR	activated	0.10016336417877354	0.4115680371672861	0.6109265208252481	0.9879254737194246	1.096550078483516	1.327696016356335	1.2475257004285805	TRUE	FALSE	chr5_38350000_38950000	TAD_UP	1
ENSG00000183111	ARHGEF37	activated	0.07692203982114489	0.2329922738011039	0.6169293410175838	1.1115564546050327	1.3202695990676905	1.4202401998490488	1.2672919066453965	TRUE	FALSE	chr5_149300000_149600000	TAD_UP	1
ENSG00000214357	NEURL1B	activated	0.08743331508653777	-0.24815246909037225	0.7182234090002491	1.4953683752434952	1.5260830260357725	1.5146990158644411	1.216498869542368	FALSE	FALSE	chr5_172100000_176900000	TAD_UP	0.928571428571429
ENSG00000113742	CPEB4	activated	0.09015342803410643	0.8156694385443948	0.980870407892254	1.123206367200915	1.1913026870240602	1.3611116640294505	1.3209499311995947	TRUE	FALSE	chr5_172100000_176900000	TAD_UP	0.928571428571429
ENSG00000171368	TPPP	activated	0.1672358310829821	-0.08377447076950904	0.7598200272825872	0.37727184825990695	0.923939129383562	0.8912647093046018	0.6381407833379805	FALSE	FALSE	chr5_650000_900000	NA	NA
ENSG00000153404	PLEKHG4B	activated	0.4352029131858448	-0.2576739469138649	0.7444456361885227	0.979209650490516	1.2492081786971	1.4433857873506484	1.2496766243425652	FALSE	FALSE	chr5_0_250000	NA	NA
ENSG00000113231	PDE8B	activated	0.0115307653418105	-0.04137107371779643	-0.12290597625701254	0.3535275517313782	0.4488433215907824	0.760299309903177	0.7907291957507234	FALSE	FALSE	chr5_77050000_77500000	TAD_UP	1
ENSG00000215218	UBE2QL1	activated	0.7081713378906829	-0.549963111106671	2.5301143870168525	4.1556780328514336	3.944419333598419	3.962132841410742	3.621747030716891	FALSE	FALSE	chr5_1650000_10250000	TAD_UP	1
ENSG00000156427	FGF18	activated	1.5241040721293675	2.2489080234370027	4.683491992782677	5.410483669961998	5.188831210847901	4.829632732657005	4.555515336662672	FALSE	FALSE	chr5_171400000_171950000	NA	NA
ENSG00000170271	FAXDC2	activated	-0.6482864577882894	1.1539829248373972	1.21033786012531	2.298594645712193	2.1342182753463383	2.6930401905053545	1.6437448956408984	FALSE	FALSE	chr5_154650000_154900000	NA	NA
ENSG00000152503	TRIM36	activated	9.259530691973464e-4	-0.2398153142243143	0.3621806177552232	0.8213044597526976	0.7863923519284908	0.7006264754814926	0.9406714491851674	FALSE	FALSE	chr5_115100000_115200000	NA	NA
ENSG00000173210	ABLIM3	activated	-0.11624329611324372	-0.3735460284680395	0.2607665753081196	1.1447116271733258	0.8824640152980413	1.0642614308162472	1.049584613499293	TRUE	FALSE	chr5_148400000_149300000	TAD_UP	1
ENSG00000287263	NA	activated	0.32867677058463074	0.3547386414269436	0.8760928191896763	1.14000508845966	0.9591768049915692	0.6050684041867866	0.215808331861314	FALSE	FALSE	chr5_42900000_43600000	TAD_UP	1
ENSG00000113083	LOX	activated	0.13174116587005846	0.5170005648070332	0.5307061947507049	1.463889551970062	1.1417647525641617	1.6059055702241605	1.8112027363371352	FALSE	FALSE	chr5_121950000_122150000	NA	NA
ENSG00000170561	IRX2	activated	0.1326506471000061	0.05855195813708402	1.0828882622653615	0.6423652064989048	0.5055777743826638	0.6619029289362559	0.4383181247780888	FALSE	FALSE	chr5_1650000_10250000	TAD_UP	1
ENSG00000169252	ADRB2	activated	-0.02256140681017785	0.26318379982337314	0.0387760408547747	1.2340304263723034	0.27439326067029063	0.4109724358325751	0.8889162477230199	FALSE	FALSE	chr5_148400000_149300000	TAD_UP	1
ENSG00000158985	CDC42SE2	activated	0.04284253433772399	0.2474773918806288	0.21099639869438505	0.4845660535267554	0.6186026374554651	0.7089253732982648	0.7902570234792283	FALSE	FALSE	chr5_131150000_131400000	TAD_UP	1
ENSG00000251169	LINC01843	activated	0.7198745874621916	0.05571377419785314	0.15602905537625042	0.6390240502521104	1.2589851203396507	1.1104544014862563	1.2044910934995046	TRUE	FALSE	chr5_134300000_134600000	TAD_UP	1
ENSG00000197375	SLC22A5	activated	0.22355800132187775	0.6704271367763213	1.1710375648704474	1.4403298818764778	1.6220335780446875	1.7290244001039772	1.8130625453812312	TRUE	FALSE	chr5_132250000_132400000	TAD_UP	1
ENSG00000256235	SMIM3	activated	-0.08875885796470562	0.13563463362215614	0.8130681672560096	1.3951228414212	1.1373876014985924	0.9161052912575608	0.6333422938804181	FALSE	FALSE	chr5_150750000_151800000	TAD_UP	1
ENSG00000113739	STC2	activated	0.21541303748387008	0.49371323105417586	0.7229138676309723	0.817135270089252	0.5620271611319881	0.7141360529883676	0.7690411012566626	FALSE	FALSE	chr5_172100000_176900000	TAD_UP	0.928571428571429
ENSG00000168916	ZNF608	activated	-0.00324010716406226	0.06928231498960852	1.2317583155931566	0.9167982051282773	0.7097173074739305	0.7603041229084941	0.21627163640320332	TRUE	FALSE	chr5_123600000_126600000	TAD_UP	1
ENSG00000039139	DNAH5	activated	-0.06962817590885964	-0.25922198174794686	0.2606617699769992	0.58192001967937	1.012228258105637	0.7603764014063352	0.8156655068743651	TRUE	FALSE	chr5_13950000_14400000	TAD_UP	1
ENSG00000124782	RREB1	activated	0.02485695588592581	0.20145449127370513	0.8700545457550964	1.1312814453494542	1.2836017449463824	1.1447983372653965	1.012100756303803	FALSE	FALSE	chr6_6650000_7300000	TAD_UP	1
ENSG00000137288	UQCC2	activated	-4.228684092734537e-4	-0.01636233754974884	1.044370892640348	0.20836187591372984	0.11277683898620476	-0.04195853166256563	0.05528383680221258	TRUE	FALSE	chr6_33350000_35500000	TAD_UP	1
ENSG00000065308	TRAM2	activated	-0.01423286242048142	0.06351232607504961	0.33108631798854005	0.6645534280512299	0.7158081374634577	0.928992029801932	0.9610203016703324	FALSE	FALSE	chr6_52400000_52700000	TAD_UP	1
ENSG00000124813	RUNX2	activated	0.16766177142146238	0.5871515755119149	1.1856800238923957	1.131865925099371	1.253149307975472	1.2233991974987708	1.469482813798041	FALSE	FALSE	chr6_44400000_46050000	TAD_UP	1
ENSG00000161896	IP6K3	activated	1.7026827464738394	2.3573602674341196	4.963328217933173	6.910716421069293	7.163791390766799	7.299869649646692	6.896609658144452	TRUE	FALSE	chr6_33350000_35500000	TAD_UP	1
ENSG00000156535	CD109	activated	0.01163217412450067	0.31595862427181826	0.5726542911628908	0.7849309402191497	0.9209249095848712	1.0334835265508673	1.065437592324069	TRUE	FALSE	chr6_73650000_75250000	TAD_UP	1
ENSG00000217325	PRELID1P1	activated	0.4711445778013133	-0.8693707649379409	2.4839947338378163	1.557321116163737	0.5930634638721134	-0.3023669237928537	-0.17835553476109878	FALSE	FALSE	chr6_126000000_127300000	TAD_UP	1
ENSG00000112414	ADGRG6	activated	0.02569698980978016	0.22796754307508155	0.19678206572521703	0.4171874422605167	0.5429828844977597	0.7115290703686429	0.9445690963884444	FALSE	FALSE	chr6_142150000_142450000	TAD_UP	1
ENSG00000198729	PPP1R14C	activated	0.1567946718183613	0.3633709654320876	1.1195745402340376	2.0014676893094605	2.318866706427631	2.5153985997102013	2.262081173055957	FALSE	FALSE	chr6_149900000_150850000	TAD_UP	1
ENSG00000155111	CDK19	activated	0.08595409814315978	-0.12684957373074188	0.21503002136095944	0.5350711435043015	0.6401792542872468	0.7684727009872404	0.7406069302217443	FALSE	FALSE	chr6_110450000_111000000	TAD_UP	1
ENSG00000071242	RPS6KA2	activated	0.8140010033858869	1.1820158023632272	1.572330183062712	0.7065880938367767	1.129636672003354	3.098252049117112	3.3794174459634707	FALSE	FALSE	chr6_165350000_170600000	TAD_UP	0.75
ENSG00000185345	PRKN	activated	-0.16621500943642722	-0.09691224617104165	0.41109631023403254	-1.3067632397684932	-0.28892099204318455	1.0511491574516048	2.4998434221049073	FALSE	FALSE	chr6_160550000_165350000	TAD_BALANCED	0.6
ENSG00000111962	UST	activated	0.12540046826046944	-0.23913598936489192	0.01045336172758989	0.6729961787470088	0.6908210370989389	0.9124407045425926	0.864798350616243	FALSE	FALSE	chr6_148550000_149000000	NA	NA
ENSG00000131016	AKAP12	activated	0.2754468352194893	0.3197738528716147	0.6150016048501579	0.6955888699916561	0.6575567138560002	1.0223774141825894	0.9632927979446168	TRUE	FALSE	chr6_150850000_151400000	TAD_UP	1
ENSG00000118689	FOXO3	activated	0.00553417359450722	0.509547293020797	1.827839827773526	2.2544794213774617	2.237979129956128	2.2735397059858804	2.0552446842618397	FALSE	FALSE	chr6_107900000_109150000	TAD_UP	1
ENSG00000287656	NA	activated	0.9989465233641136	0.902704181200256	2.1015724995707643	1.8874022037544056	2.3112300331764613	2.0388261035233692	1.9927804468658488	TRUE	FALSE	chr6_159650000_160550000	TAD_UP	0.9
ENSG00000154548	SRSF12	activated	0.05465452978948221	0.32215298331658526	0.8484965859803562	1.0538922484819455	0.8043173361166088	1.1864162564677605	1.1491557881880654	FALSE	FALSE	chr6_88950000_89350000	TAD_UP	1
ENSG00000112394	SLC16A10	activated	-0.5835737569946566	-1.0779880642254371	0.41191826798637377	0.9423180870581992	0.820513563026181	0.35486324285457094	0.9993947737829474	FALSE	FALSE	chr6_111000000_112100000	TAD_UP	1
ENSG00000027697	IFNGR1	activated	0.117782017449185	0.4215276382024558	0.5268604157410883	0.926472538260978	0.9888159216169594	1.192660698934159	1.3891418452411044	FALSE	FALSE	chr6_136800000_138100000	TAD_UP	1
ENSG00000219607	PPP1R3G	activated	0.2520067865500831	0.3128296463909106	0.9959835201075178	0.938370784862373	0.8208936679233245	0.7186256452980144	0.768240306641415	FALSE	FALSE	chr6_5050000_6650000	NA	NA
ENSG00000137198	GMPR	activated	-0.1084239843531742	0.7284205461004395	1.410967902697171	2.5438504943366156	3.4723309034899557	2.9474734236659024	3.242829046655745	FALSE	FALSE	chr6_15650000_16250000	NA	NA
ENSG00000188112	C6orf132	activated	0.0458764027204037	0.596562189924466	1.8715703266404475	1.8581271839640536	2.2823832399903607	1.912521810127922	1.5521364289149155	TRUE	FALSE	chr6_42050000_42200000	TAD_UP	1
ENSG00000157343	ARMC12	activated	-1.4888111639440686	0.46658373771186223	0.20330673498351215	1.3649423278544934	1.675331593443361	1.6904209165544186	1.684344614494617	TRUE	FALSE	chr6_35500000_35750000	TAD_UP	1
ENSG00000096060	FKBP5	activated	0.05871637105068623	0.8888607533361593	2.799688002006724	3.733918021567687	3.846021101530671	4.385806191628688	4.440025245689483	TRUE	FALSE	chr6_35500000_35750000	TAD_UP	1
ENSG00000112561	TFEB	activated	0.4150823508187509	0.14998161343485633	0.8030795343413163	1.1585422353176733	1.1959059454489782	0.9889545639134524	1.218984264996285	TRUE	FALSE	chr6_41700000_41800000	TAD_UP	1
ENSG00000047936	ROS1	activated	0.2533188725383613	0.4294686727218947	0.2812494238697351	0.959367121746704	1.332273847779802	1.3204350320647429	1.393897797704322	TRUE	FALSE	chr6_116750000_119150000	TAD_UP	0.8
ENSG00000153294	ADGRF4	activated	0.07506186896468815	0.6793427212223663	1.1294534477444995	1.649524477976864	1.8203429832522455	1.9068556267344057	1.970630575484948	FALSE	FALSE	chr6_47600000_49900000	TAD_UP	1
ENSG00000252711	RN7SKP116	activated	1.4261741637250172	2.1674782031513407	1.693600705681115	1.9472353075086717	1.2862935910196884	1.6125991013454202	2.501260587841805	TRUE	FALSE	chr6_47600000_49900000	TAD_UP	1
ENSG00000233892	PAIP1P1	activated	0.4956623721789589	0.4455882856263941	0.2822073108844938	0.9483408807650998	1.1321335800281669	0.6930793669801908	1.6048720377496424	FALSE	FALSE	chr6_29650000_30200000	NA	NA
ENSG00000204301	NOTCH4	activated	-0.20843548260708153	0.7150678028929853	2.238879549432588	2.5678078861703546	2.984596895823856	2.584042708476926	2.0368075900385	FALSE	FALSE	chr6_32200000_32450000	NA	NA
ENSG00000272221	NA	activated	-0.01989753885813423	0.2834687119966814	0.8059716729976276	0.8145988650240759	0.8610849326540712	0.813893138716346	0.8357317520587974	FALSE	FALSE	chr6_31200000_31400000	NA	NA
ENSG00000026297	RNASET2	activated	0.3402351413342898	0.09417999207226056	0.9624904254501768	0.355312860821393	0.6243346392692597	0.7149801659255904	0.3733833982214839	FALSE	FALSE	chr6_165350000_170600000	TAD_UP	0.75
ENSG00000118523	CCN2	activated	0.4698200038643564	1.0366035621072869	1.2517880910236932	2.15525810882298	1.9243308080315735	1.8840846726998943	1.456730925483014	FALSE	FALSE	chr6_131900000_132250000	TAD_UP	1
ENSG00000118432	CNR1	activated	0.380600441554257	0.02944523103945592	0.30617124005387153	1.5298397998452626	1.8977231316925731	1.912338154061298	2.1959053396473687	FALSE	FALSE	chr6_87050000_88950000	TAD_UP	1
ENSG00000118515	SGK1	activated	0.3666750670841792	0.4537434161592929	0.7643163465102769	1.0530553536496752	1.0256571490239772	1.0614383387113482	0.9865779959642798	FALSE	FALSE	chr6_134100000_135000000	TAD_UP	0.9375
ENSG00000146555	SDK1	activated	-0.01779887060194196	0.3084311330208342	0.6542734971226583	0.2767965868671873	0.8466946113579935	0.9030192992350512	1.6571059396991852	TRUE	FALSE	chr7_2600000_5200000	TAD_UP	1
ENSG00000105928	GSDME	activated	0.02358126535220237	0.3306788731044353	0.2579262189884638	0.5082040715602154	0.5973379076219512	0.8196759313793383	0.8588484961604813	FALSE	FALSE	chr7_23550000_25150000	TAD_UP	1
ENSG00000002746	HECW1	activated	0.07879651812579153	-0.18365851879359363	0.3176432205994697	0.6428279890686762	0.7813671516561578	0.710680639500041	0.48366761561223176	FALSE	FALSE	chr7_42900000_43900000	TAD_UP	1
ENSG00000176532	PRR15	activated	-0.1718523354572825	0.32369682386532683	1.1971967534454493	0.778112625421764	1.3030235853174876	0.9740878549496956	1.012796209003989	FALSE	FALSE	chr7_28900000_29600000	TAD_UP	1
ENSG00000009950	MLXIPL	activated	-0.09505039532775594	-0.25694348652964366	-0.04814961393073472	0.3977417104038587	0.664875074285913	1.067766593878806	0.6791156827714663	FALSE	FALSE	chr7_73550000_73750000	NA	NA
ENSG00000106366	SERPINE1	activated	0.25338981279076794	0.3939029629418071	0.8346958745508302	1.5050867992884376	1.217964421022489	1.3805700676439918	1.214810629427216	TRUE	FALSE	chr7_101100000_101200000	TAD_UP	1
ENSG00000091129	NRCAM	activated	-7.033790747640156e-4	0.23318431007781107	0.11182941537590184	0.488770782897648	0.625076178980201	0.7395813638788115	0.8575972606824699	TRUE	FALSE	chr7_108150000_108550000	TAD_UP	1
ENSG00000004799	PDK4	activated	0.7130754389544098	1.5650585556565757	1.7338830278363937	1.6504559268715266	1.877092517046293	2.0156244678433124	1.919207265785044	TRUE	FALSE	chr7_93550000_95700000	TAD_UP	0.818181818181818
ENSG00000128564	VGF	activated	0.4538922379704105	-0.32421045622438116	0.6564505613000237	0.7470011775252386	0.9835467282985793	1.0639235998623031	0.8104201759950775	FALSE	FALSE	chr7_101100000_101200000	TAD_UP	1
ENSG00000166924	NYAP1	activated	-0.3294525299199367	0.3101537322253268	0.5852178693136386	1.3601368162597252	1.240485499132095	1.485201655275964	1.4012682087886978	TRUE	FALSE	chr7_100450000_100600000	TAD_UP	1
ENSG00000126870	DYNC2I1	activated	0.12401680356045884	0.06276530152122868	0.4971251358876823	0.9273342904640044	1.0175961941236509	1.0797798734698671	1.1617338962809032	TRUE	FALSE	chr7_148100000_159345973	TAD_UP	0.777777777777778
ENSG00000182158	CREB3L2	activated	0.13252313384129802	0.191102235732044	0.756332225555951	0.7915044752397331	0.6755120129007894	0.8062580448779514	0.6494840087992294	TRUE	FALSE	chr7_137600000_139000000	TAD_UP	1
ENSG00000117868	ESYT2	activated	0.02880989114271417	0.18135014633188912	0.5672398749926747	0.7392077622748812	0.8366085321516394	0.9521526543934684	0.9630858419196352	TRUE	FALSE	chr7_148100000_159345973	TAD_UP	0.777777777777778
ENSG00000064393	HIPK2	activated	-0.02071779101960362	0.13751420753663277	0.5432598482866934	0.9280053521990316	1.0465943818019514	1.4016940542495595	1.2845150895488038	TRUE	FALSE	chr7_139350000_140450000	TAD_UP	1
ENSG00000136286	MYO1G	activated	-0.27936556450665495	0.5921512633488102	1.1998599839279929	1.4185580800344189	2.064439121215229	1.7915577568200027	2.5761969733014296	TRUE	FALSE	chr7_44000000_45150000	TAD_UP	0.75
ENSG00000106617	PRKAG2	activated	-0.08852577896142796	0.12668844253964198	0.10866094371506888	0.6979801273494042	0.6676994300620793	0.791555218226016	1.0152746044385617	TRUE	FALSE	chr7_148100000_159345973	TAD_UP	0.777777777777778
ENSG00000239911	PRKAG2-AS1	activated	-0.07850960804513545	0.2676417192097949	0.23772641143184095	1.593702936722957	1.231256219367263	1.6680948093750572	1.9221440417387403	TRUE	FALSE	chr7_148100000_159345973	TAD_UP	0.777777777777778
ENSG00000272752	STAG3L5P-PVRIG2P-PILRB	activated	0.5158211994988103	0.7762411058466832	1.8857523260797011	1.0314909575207565	0.9888487801681456	0.31046869296756874	0.7255491330554914	FALSE	FALSE	chr7_100100000_100450000	TAD_UP	1
ENSG00000122786	CALD1	activated	-0.00523999260201232	0.3040522794345406	0.35944198224171964	1.16309253185148	1.277852913563578	1.6663332962175272	1.826251383427378	FALSE	FALSE	chr7_134600000_135250000	TAD_UP	1
ENSG00000257335	MGAM	activated	0.09296734448032032	0.0755685063700096	0.7172412437726329	0.3623627978094685	0.8916680366583004	1.1102515286087775	0.9098821461625174	FALSE	FALSE	chr7_141800000_142400000	NA	NA
ENSG00000230882	NA	activated	-0.160278452688298	0.4276079757418865	0.9871369217258628	0.6200207934876198	0.7825584881562881	1.1200231487021348	0.9093097043093098	TRUE	FALSE	chr7_75400000_76400000	TAD_UP	1
ENSG00000227038	GTF2IP7	activated	0.4520607068905451	0.5883188140364636	1.1731754112418664	1.0702069250720767	1.4518168368578948	1.2446823411272858	1.1414821139894018	TRUE	FALSE	chr7_75400000_76400000	TAD_UP	1
ENSG00000135245	HILPDA	activated	0.3350985199288178	0.7921878111815613	0.7040827199133979	0.1728766003488751	0.14881801248381749	0.12528221275047902	0.12858078714561405	FALSE	FALSE	chr7_128350000_129150000	NA	NA
ENSG00000106588	PSMA2	activated	0.06761314755145584	0.4146043244201931	-0.4936872439937021	0.16878470008265634	0.22125899933206555	0.4692768488042099	0.8685958974442225	TRUE	FALSE	chr7_42900000_43900000	TAD_UP	1
ENSG00000146676	PURB	activated	0.18221892613625573	0.28209137734013556	0.19637711054783608	0.5096400646610879	0.5526838379618005	0.7629375266195086	0.6678674230254541	FALSE	FALSE	chr7_44000000_45150000	TAD_UP	0.75
ENSG00000106123	EPHB6	activated	0.05494729748129157	-0.36544174596832385	-0.33307757545961447	1.003846975675213	1.1892519028782245	1.1685144366773914	1.5637164354634665	FALSE	FALSE	chr7_142400000_143250000	TAD_UP	1
ENSG00000006704	GTF2IRD1	activated	0.02355547986794892	-0.06415182370286007	0.2370533583707929	0.6744477088095333	0.7309840935411365	0.8387018024287788	0.8104097132157693	FALSE	FALSE	chr7_74400000_74700000	TAD_UP	1
ENSG00000075790	BCAP29	activated	0.6166554793551592	0.609770621514711	0.3634063028576134	0.9735481535707324	0.5317829981660164	0.8861349123950742	0.9616405509160052	FALSE	FALSE	chr7_107150000_107900000	NA	NA
ENSG00000087085	ACHE	activated	0.2652114513762864	0.1191299958019288	0.24046343808243031	0.7528291664468081	1.128215318634471	0.3865248097034712	0.9831157654690263	FALSE	FALSE	NA	NA	NA
ENSG00000008311	AASS	activated	0.6821677686097662	0.6611693058108727	0.6683466930413097	1.8226414355349905	2.1290764999905045	2.5059735788928736	2.1903273692947707	FALSE	FALSE	NA	NA	NA
ENSG00000106266	SNX8	activated	-0.02685843755597587	0.08174410926236582	0.43433199665904826	1.1433882487491993	1.0863751127053327	1.3627876364587437	1.3589422246799605	FALSE	FALSE	chr7_1550000_2450000	TAD_BALANCED	0.5
ENSG00000146678	IGFBP1	activated	0.48690163462263464	1.5382092763408948	2.130165071506952	1.993215096172218	2.1498896109739465	1.9116751582548523	1.5756217034339586	TRUE	FALSE	chr7_45150000_47350000	TAD_BALANCED	0.5
ENSG00000287733	NA	activated	0.8130355724129421	0.4295438090031882	0.9003556590734838	0.90120860406686365	1.019780080554309	1.475523410928349	0.9547550335326892	FALSE	FALSE	chr7_134600000_135250000	TAD_UP	1
ENSG00000224903	RNF32-AS1	activated	0.6044852269581904	0.5458961857439362	0.45740866225726745	0.6286475493855183	0.7908152227778292	1.1516980562620025	1.1095409834073544	FALSE	FALSE	chr7_148100000_159345973	TAD_UP	0.777777777777778
ENSG00000055118	KCNH2	activated	-0.6881557137670877	-0.6367860913948239	0.8808972447994651	1.8627138811250967	1.8729338742219737	2.0198232807237684	2.091438918947172	FALSE	FALSE	chr7_148100000_159345973	TAD_UP	0.777777777777778
ENSG00000169894	MUC3A	activated	0.00648086968762243	0.11247286403789424	0.4601875267789368	0.7382346645033413	0.8141804084302202	0.8418672118513505	0.919615666575309	FALSE	FALSE	chr7_100900000_101100000	TAD_UP	1
ENSG00000170379	TCAF2	activated	0.3178236497960014	1.162644021684049	1.063831050547258	2.182574440489927	2.8430762337172646	3.1019525451500747	2.7441625103916714	FALSE	FALSE	NA	NA	NA
ENSG00000146950	SHROOM2	activated	0.6247314708307885	-0.5261398841712772	0.3580699730445177	1.5036770701762014	0.6193971670843864	1.597992815677216	1.5923345863607703	FALSE	FALSE	chrX_8750000_10150000	TAD_UP	1
ENSG00000147027	TMEM47	activated	0.09800337550296848	0.5720312730235374	0.5642283826844585	1.6214010901578613	1.563166746322847	1.7059307357797464	1.5370726456414043	FALSE	FALSE	chrX_34350000_37050000	TAD_UP	1
ENSG00000173698	ADGRG2	activated	-0.09407668787375174	0.17684652852191113	0.40696173980897227	0.7515205273198319	1.034087009968683	1.3752132079198571	1.5410115847437995	TRUE	FALSE	chrX_16750000_20150000	TAD_BALANCED	0.666666666666667
ENSG00000169891	REPS2	activated	0.38063404459388234	-0.32360728746751216	0.5638305551830121	1.6436258990666457	1.8574000325000557	1.732303437018015	1.5285117018512824	FALSE	FALSE	chrX_16750000_20150000	TAD_BALANCED	0.666666666666667
ENSG00000147119	CHST7	activated	-0.05926132921721102	0.11275224923753654	0.5399608106646562	1.1039389926168923	1.067003428803806	1.3923321859386528	1.466215209778076	TRUE	FALSE	chrX_43800000_47100000	TAD_UP	0.75
ENSG00000102271	KLHL4	activated	-0.10791401614166002	0.3324886664436067	0.5260684319647474	0.6734529056224877	0.6786434328278372	0.8308482040078754	0.9089420175873664	FALSE	FALSE	chrX_87300000_87700000	TAD_UP	1
ENSG00000122824	NUDT10	activated	0.01237052484056598	0.4180140003579174	1.4553774175894656	2.1008223937746298	2.11854773277295	2.462154566590178	2.596161789305268	FALSE	FALSE	chrX_49600000_52650000	NA	NA
ENSG00000184205	TSPYL2	activated	0.20428760129405815	0.6483974627959052	1.2999604269441063	1.7741471795397077	1.8392598874651087	1.8468780748628	1.953081469799925	TRUE	FALSE	chrX_53000000_53100000	TAD_UP	1
ENSG00000182489	XKRX	activated	-0.11713505114644392	1.039544369761535	2.232455765875344	2.0966559264678413	2.6094910195336825	3.090154476848948	2.5591618741597366	TRUE	FALSE	chrX_100600000_101400000	TAD_UP	1
ENSG00000250995	TMEM30BP1	activated	0.48242521843874	-0.2215497912937127	1.9094273952897445	1.1051922256415374	2.252129443886912	1.3013256898651773	1.7956870624974657	FALSE	FALSE	chrX_118600000_118800000	TAD_UP	1
ENSG00000160219	GAB3	activated	0.4889723755434944	0.08185077952813828	0.8954765931879944	1.3061434513329746	0.4178199238473013	0.9987288320631896	0.9014596864732984	FALSE	FALSE	chrX_154550000_154900000	TAD_UP	1
ENSG00000182890	GLUD2	activated	0.16708102948628942	0.11823695625393088	1.1719667573337902	0.4287576252207653	-0.01919506381527163	-0.0428218337053985	0.23975467628899033	FALSE	FALSE	chrX_121000000_123550000	TAD_UP	1
ENSG00000250423	KIAA1210	activated	0.4161269721522072	-0.758712185339942	2.622893064640801	2.2746310822315685	2.2888585725930986	2.991798329348258	3.7332402577055386	FALSE	FALSE	chrX_118800000_119250000	NA	NA
ENSG00000223749	MIR503HG	activated	0.13320738878542077	0.44304410227902785	1.212958395520052	1.6330449677682302	1.192533700764402	1.147464461871594	1.293758021103768	TRUE	FALSE	chrX_134400000_135100000	TAD_UP	1
ENSG00000189221	MAOA	activated	-0.24832687793621944	-0.20815629179892256	0.00410234284404367	0.5095011286393936	0.9793649643722172	1.5367541276967795	1.840432721928715	FALSE	FALSE	chrX_41500000_43800000	TAD_UP	1
ENSG00000004848	ARX	activated	0.09910821888388328	0.1255683283884955	0.6558590500969114	0.17719504190490604	0.35713058112958224	0.3681395340913598	0.7558868004761805	FALSE	FALSE	chrX_24250000_25200000	TAD_UP	1
ENSG00000157600	TMEM164	activated	0.0213512224745452	0.19135083718053872	0.8780779411189696	1.201843177480974	1.214123192701415	1.4609639123506384	1.4477040708474376	FALSE	FALSE	chrX_109900000_110150000	TAD_UP	1
ENSG00000198455	ZXDB	activated	0.16522537733537002	0.5939464953512197	0.5156069053959698	0.7389639887551437	0.8097325199362155	0.8793285032274133	0.88703181996168	TRUE	FALSE	chrX_55200000_58050000	TAD_UP	1
ENSG00000183837	PNMA3	activated	0.21878829094699231	0.03752690507606659	1.1380373529803582	0.9213464804078124	1.2662236363915202	1.586298605915902	1.707940386372792	FALSE	FALSE	chrX_152950000_153550000	NA	NA
ENSG00000156011	PSD3	activated	0.1816062478421543	0.32179252375211603	0.23189128902561812	0.5829070762150853	0.706670090144366	0.9294099978562386	0.8975887213231517	FALSE	FALSE	chr8_18850000_19350000	TAD_UP	1
ENSG00000172728	FUT10	activated	0.0777539395202869	0.24153270575278343	0.5814268196560483	0.9187605111269344	0.8274498571753525	0.7761647869227235	0.8026179843058072	TRUE	FALSE	chr8_31150000_33600000	TAD_UP	0.75
ENSG00000156675	RAB11FIP1	activated	0.08395959288972063	0.6000261534491164	1.4698643365827273	1.8741657392066011	1.8340881989981797	1.9478932103185216	1.8635615154439855	FALSE	FALSE	chr8_37750000_38800000	TAD_UP	1
ENSG00000253476	NA	activated	0.12405729815041572	-0.10161695961729995	0.622300805340343	0.29500152106542843	0.9489625436352858	0.8835288400796548	0.7928046785429932	FALSE	FALSE	chr8_25150000_25500000	TAD_UP	1
ENSG00000197892	KIF13B	activated	0.03440724790722677	-0.23830817240573263	0.5093680438233612	0.973912934890806	1.364430886923535	1.3300411962729572	1.0650583977458363	FALSE	FALSE	chr8_29150000_29300000	TAD_UP	1
ENSG00000076641	PAG1	activated	0.3206195589771961	0.5338177874586204	1.3166030853045114	1.7675639518574575	2.075487998525294	1.5962512244032212	1.3197450525260257	FALSE	FALSE	chr8_79600000_81300000	TAD_UP	1
ENSG00000164683	HEY1	activated	0.6305986289252448	0.9390645597529328	1.5998090479150842	1.9890657061339656	1.7845186394544372	1.3886542996539135	1.0997876247734717	TRUE	FALSE	chr8_79600000_81300000	TAD_UP	1
ENSG00000164951	PDP1	activated	-0.07716646486138003	-0.09224801939782036	0.1070778392976046	0.6017297524085707	0.6743584599862869	0.7685326899908446	0.6545470050128452	FALSE	FALSE	chr8_93700000_94550000	TAD_UP	1
ENSG00000156466	GDF6	activated	0.6068682572203528	0.9407781668190288	2.1091799165729435	2.5549318083259376	2.1190539345648625	2.186081685099347	1.8118436169968828	FALSE	FALSE	chr8_95250000_96250000	TAD_UP	1
ENSG00000147526	TACC1	activated	-0.053544715918088	0.2452150686812673	0.6571024485928368	0.6667593884573323	0.7994762469346953	0.7541488324593005	0.778413298885321	TRUE	FALSE	chr8_37750000_38800000	TAD_UP	1
ENSG00000147689	FAM83A	activated	0.09073728646379443	-0.289971036509387	0.3415413780028536	0.6237648364480526	1.1505239380906698	1.3922210836421314	1.417693270897717	TRUE	FALSE	chr8_122650000_123250000	TAD_UP	1
ENSG00000147642	SYBU	activated	0.20390657798878023	1.4300276254410635	2.157824189183254	2.452074923619915	2.7853346576268874	2.5676897579741795	2.507729150310461	FALSE	FALSE	NA	NA	NA
ENSG00000156804	FBXO32	activated	0.01128676115932457	0.3599892866720467	0.8517728284028113	0.4041034644245001	0.13578409540472564	-0.14899106043506438	-0.1631883477708971	FALSE	FALSE	chr8_123400000_123800000	TAD_UP	1
ENSG00000155926	SLA	activated	0.5397016263603054	0.5302570740783006	1.630292077051852	1.1804285393024083	1.7209640192032964	1.7054465199197144	1.933437272411902	FALSE	FALSE	chr8_132800000_133500000	TAD_UP	1
ENSG00000286010	NA	activated	0.7078158720958363	0.5290226450657417	0.3884879135215139	0.6757976695639123	1.4826249246358432	0.6142816914821703	0.6805887367537372	FALSE	FALSE	chr8_126800000_130100000	TAD_UP	0.95
ENSG00000042832	TG	activated	0.8335175833732701	0.5447117420074096	1.7030359005626508	2.195198729635757	1.9358127275691177	2.19851469968632	2.2973878323900387	TRUE	FALSE	chr8_132800000_133500000	TAD_UP	1
ENSG00000261220	ST3GAL1-DT	activated	0.7349095833122	1.0980130719929293	1.3293477537524785	1.6332445056483185	1.5220778295569095	1.153080892671008	1.1215040197748087	FALSE	FALSE	chr8_133500000_138700000	TAD_UP	1
ENSG00000008513	ST3GAL1	activated	-0.0877998656408574	0.6537195281627372	1.9419666710188688	2.7054943321486453	2.670601146315319	2.7227875511082265	2.5848064448930033	FALSE	FALSE	chr8_133500000_138700000	TAD_UP	1
ENSG00000167653	PSCA	activated	0.8588210907259102	0.41200277796018775	1.5139617146028586	2.516022653875377	2.6170679920357456	2.373912484206373	2.5211616946338973	TRUE	FALSE	chr8_141350000_143250000	TAD_UP	0.75
ENSG00000104415	CCN4	activated	-0.38457783230519355	-0.14160031397911366	0.2471495978396949	0.7540650657032149	1.070446973426385	1.1452611067282532	1.0714995260177334	TRUE	FALSE	chr8_132800000_133500000	TAD_UP	1
ENSG00000008853	RHOBTB2	activated	0.20692452942961723	0.5263864854380614	1.3881374026191309	1.7484829229671843	1.7198254583636874	1.682608707607803	1.5139710552583103	TRUE	FALSE	chr8_22950000_23050000	TAD_UP	1
ENSG00000022567	SLC45A4	activated	0.06738758385997162	0.06223808418305729	1.0876376600705822	1.2301763709014812	1.442956528372034	1.8464697112056696	1.828871714035816	FALSE	FALSE	chr8_141200000_141350000	TAD_UP	1
ENSG00000104419	NDRG1	activated	0.09179932596161872	0.3500749054310195	1.2469596671434136	1.7741792115191926	1.729999291545839	1.8481446317055907	1.7716174548337666	FALSE	FALSE	chr8_132800000_133500000	TAD_UP	1
ENSG00000154582	ELOC	activated	-0.0944045919979168	-0.0558332380353457	-7.397878585826349e-5	0.4360404127386927	0.5731021821440183	0.6282273671889793	0.7789404744994379	FALSE	FALSE	chr8_72950000_74400000	TAD_UP	1
ENSG00000282164	PEG13	activated	0.22898492211723037	0.976823660709626	1.3609597285313466	1.9813115253922116	1.4846124042190476	0.9366475274980076	1.1977250524437717	FALSE	FALSE	chr8_138700000_140450000	TAD_UP	1
ENSG00000169499	PLEKHA2	activated	0.09427161919041778	0.1836880332149544	0.03004435104958703	0.7539779666169282	0.712242297812184	0.8414271846937025	0.996746677581262	FALSE	FALSE	chr8_38800000_39000000	TAD_UP	1
ENSG00000170873	MTSS1	activated	0.3479533684149881	-0.1254093468116414	0.03834744428599299	1.2924083577558767	1.3193089173257302	1.5156668039070922	1.7850672932158125	FALSE	FALSE	chr8_124550000_125000000	NA	NA
ENSG00000104695	PPP2CB	activated	0.01126529532968401	0.25957727438775036	0.5709714392422571	0.8605748375825891	0.7834846795323458	0.903396978693216	0.9081357489126998	TRUE	FALSE	chr8_30650000_30850000	TAD_UP	1
ENSG00000104635	SLC39A14	activated	-0.02037653397829308	0.3312178760570004	0.6218843881383465	1.0918643774450998	1.2413245109890532	1.357358876555529	1.3750417361159268	TRUE	FALSE	chr8_22250000_22400000	TAD_UP	1
ENSG00000168481	LGI3	activated	0.13258816124928838	0.12465407971584688	0.5199713034770179	0.4562634577395129	0.8850859327985926	0.5712765849446836	0.31045792258568405	FALSE	FALSE	chr8_22150000_22250000	TAD_UP	1
ENSG00000154319	FAM167A	activated	0.2716988048617574	0.07289304279504656	0.7512089965581341	0.09598864518335835	-0.22601080881199817	-0.09223441069229132	-0.21846421159066143	TRUE	FALSE	chr8_11300000_12050000	TAD_BALANCED	0.666666666666667
ENSG00000176595	KBTBD11	activated	0.17586680317975875	0.35644002067381847	0.8502162222224916	1.036128491522765	0.9119021206293272	0.8864506064041057	0.856440012385047	FALSE	FALSE	chr8_200000_2250000	TAD_UP	1
ENSG00000233846	SELENOTP1	activated	0.03228813307566821	0.5305575189929242	0.6670798852286847	0.11381809627879894	-0.1673777371355012	0.3823913145539627	1.3148183710677173	FALSE	FALSE	chr9_6000000_6350000	NA	NA
ENSG00000153714	LURAP1L	activated	0.1474358853104435	1.1554189989182466	1.2115171789501626	0.6491411048462093	0.7400307676753681	0.5623459015849662	0.6584420225431019	TRUE	FALSE	chr9_12650000_14850000	TAD_UP	1
ENSG00000119121	TRPM6	activated	0.1404040921145334	0.3685990742560738	0.5074039214616362	1.0203731082604666	0.9711722381446368	1.1023075311905222	1.055777219151743	FALSE	FALSE	chr9_74750000_75100000	TAD_UP	1
ENSG00000107372	ZFAND5	activated	0.198451961416315	0.832196720226873	0.9724080689324034	1.0885466051294157	1.000505546172985	1.0575433950445543	0.9390375280447384	TRUE	FALSE	chr9_72250000_72850000	TAD_UP	1
ENSG00000172159	FRMD3	activated	-0.3682893391951311	0.0785746160223386	0.20926451456408515	0.9504327066096532	1.1444414488312629	1.0169393061815557	1.1778939279295988	FALSE	FALSE	chr9_78200000_83650000	TAD_UP	0.9
ENSG00000204291	COL15A1	activated	0.22834604072923548	-0.38711866537722694	0.9126541512115762	1.6835571940387268	2.0536155354975723	2.0870453848649504	2.2141312261675323	FALSE	FALSE	chr9_98800000_99150000	TAD_UP	1
ENSG00000157654	PALM2AKAP2	activated	-0.0132137424551383	0.4272032560434084	0.5802015187373536	1.2543470878592002	1.1008689313902345	1.4245308627086508	1.39603765331759	FALSE	FALSE	chr9_108900000_109550000	TAD_UP	1
ENSG00000213694	S1PR3	activated	0.07897364388075448	0.2235534024859293	0.394671064391218	0.7410395887535461	0.8058439163328995	0.6555800948546602	0.7077749098504315	TRUE	FALSE	chr9_87650000_89350000	TAD_UP	0.888888888888889
ENSG00000099139	PCSK5	activated	-0.04629201458320932	-0.05976934694016043	0.6077909950421492	0.5174634621792754	0.7529399058170997	0.9155009683834998	0.7570132166406891	FALSE	FALSE	chr9_75100000_76750000	TAD_UP	0.8
ENSG00000106789	CORO2A	activated	0.2284255317185028	-0.21189047869005093	0.9698538646719856	1.75696425910311	2.455714484104627	2.489698418768259	2.118655885806814	FALSE	FALSE	chr9_98050000_98800000	TAD_UP	0.8
ENSG00000157303	SUSD3	activated	1.110773963670116	0.3974630654893393	-0.5031348005063779	1.98534477462894	2.2989144305679665	1.3740529639335468	2.928631236609012	FALSE	FALSE	chr9_92950000_93650000	TAD_DOWN	0
ENSG00000120162	MOB3B	activated	0.06025197810732182	0.35187513960230254	0.6866430086322031	1.2456743531070051	1.222222968665572	1.50414359869877	1.4428689323888202	TRUE	FALSE	chr9_27300000_27550000	TAD_UP	1
ENSG00000148175	STOM	activated	0.15224567020233218	0.9548283876942611	1.9593230418784275	2.243543711685086	2.3651049166314437	2.7128903791443912	2.8708827010789126	TRUE	FALSE	chr9_121200000_121450000	TAD_UP	1
ENSG00000106799	TGFBR1	activated	0.12698354489312175	0.5598939398581397	0.8731933471733757	1.3425125301814382	1.380063040169903	1.6449620377761272	1.6100718901629496	TRUE	FALSE	chr9_98800000_99150000	TAD_UP	1
ENSG00000147872	PLIN2	activated	0.03523263877078739	0.10978625234346824	0.31976092456124006	0.6530202632234663	0.7370431183126718	0.7926499113999458	0.7210821959695944	FALSE	FALSE	chr9_19050000_19450000	TAD_UP	1
ENSG00000148344	PTGES	activated	-0.04377847395349246	0.12160621921309377	0.5457578881414329	0.8286458443829543	0.8309591582425858	0.9100707687298542	0.9457811231633338	TRUE	FALSE	chr9_129650000_129800000	TAD_BALANCED	0.5
ENSG00000285103	NA	activated	1.046741599256094	1.5632793545990105	1.630848054917383	1.740293710438005	1.5692705609069062	1.5879286715172156	1.6213761869489054	FALSE	FALSE	chr9_27300000_27550000	TAD_UP	1
ENSG00000136830	NIBAN2	activated	0.048751994922638	-0.1281135966893226	0.48660101475693296	0.7564705389371862	0.6772565372502848	0.8369826533199363	0.8089506119745282	TRUE	FALSE	chr9_127500000_127600000	TAD_UP	1
ENSG00000234537	NA	activated	-0.6715410191470498	-0.3990312451279084	0.8277102048907571	0.9664986789859682	1.407152927055442	1.4349727300896096	1.5273199089914566	FALSE	FALSE	chr9_92100000_92850000	TAD_UP	1
ENSG00000225511	LINC00475	activated	0.1955135476809939	0.8951919041454667	1.832755770824488	2.4393832166461413	2.738977511054822	2.545651978644645	2.4738594952459705	FALSE	FALSE	chr9_92100000_92850000	TAD_UP	1
ENSG00000107159	CA9	activated	0.2636307023235847	0.4447824612856164	1.2533652423115398	1.3887532946075445	1.3070837703656448	1.6703789971354066	1.511729686257864	TRUE	FALSE	chr9_35650000_35750000	TAD_UP	1
ENSG00000197070	ARRDC1	activated	0.03967917774361437	0.14771283389682557	0.8815253595077737	1.2985307568234408	1.516803800925095	1.4537355089736717	1.6098880082562974	TRUE	FALSE	chr9_137550000_137650000	TAD_UP	1
ENSG00000096968	JAK2	activated	0.03961321078432506	0.2050527899389165	0.11436460083827205	0.5525552358216337	0.49167786811047126	0.8138066958441798	0.8588278462222387	FALSE	FALSE	chr9_4650000_5650000	TAD_UP	1
ENSG00000214402	LCNL1	activated	-1.1354050754804872	2.342691187791321	4.403382217710173	4.829957710036072	5.810973603178498	5.0637654054746415	4.793837204637036	TRUE	FALSE	chr9_136950000_137050000	TAD_UP	1
ENSG00000169583	CLIC3	activated	0.07133958876846233	0.4248510988094836	0.4711164722180683	1.2782326092443388	0.7874603307686536	0.8602660042153829	0.9803043853867034	FALSE	FALSE	chr9_136950000_137050000	TAD_UP	1
ENSG00000054179	ENTPD2	activated	0.3562686944882606	0.7879843702793593	2.3815892464978408	2.6252804852053293	2.96293818457915	3.1700052310928273	3.2267579193740215	TRUE	FALSE	chr9_137050000_137150000	TAD_UP	1
ENSG00000187713	TMEM203	activated	0.16764534785261284	-0.3977572611525587	0.7764850682590247	0.6657381102299039	0.22248318535716652	0.29023795945485226	0.3022052019386003	FALSE	FALSE	chr9_137150000_137250000	NA	NA
ENSG00000275465	NA	activated	1.9247848508619976	2.496164016871838	1.5681277528352362	2.6203356174797077	2.7184961836664305	3.5189783188711994	3.3624980904948556	TRUE	FALSE	chr9_95150000_96350000	TAD_UP	1
ENSG00000130720	FIBCD1	activated	0.01164543973980874	-0.43372458982223777	-0.09007667450203376	1.0365361576794652	0.844045439216551	1.0104560476218152	0.9035175390876772	TRUE	FALSE	chr9_130700000_131050000	TAD_UP	1
ENSG00000261094	NA	activated	0.2719064602787542	0.6151640962904302	0.3042814384624327	0.573296689292213	0.49240769431873216	0.4545078632815603	1.0153022295925047	FALSE	FALSE	chr9_122850000_122950000	TAD_DOWN	0
ENSG00000106852	LHX6	activated	0.38254865779453545	0.39246239918849735	1.8226039550875808	2.7022147354456845	2.7538067664551504	3.359892872887684	3.247749713475201	FALSE	FALSE	chr9_122100000_122350000	TAD_UP	1
ENSG00000148180	GSN	activated	-0.05373214692561141	-0.189884681254061	0.7189716836083835	0.651961995160112	0.9085956941293916	0.8838074470741545	0.8489596352160281	FALSE	FALSE	chr9_121200000_121450000	TAD_UP	1
ENSG00000171097	KYAT1	activated	0.39641667743723225	0.17299687226597413	0.893695621918094	0.6832888530812166	1.1478739374040865	1.3634701522238453	0.8504524062461291	FALSE	FALSE	chr9_128850000_128950000	TAD_UP	1
ENSG00000136802	LRRC8A	activated	-0.00848820120642032	0.5432429712360235	1.3006424275354664	1.7115467946507572	1.5705723201143476	1.5438446537677302	1.28322495374766	TRUE	FALSE	chr9_128850000_128950000	TAD_UP	1
ENSG00000095203	EPB41L4B	activated	-0.0334353312447701	0.18671767754203616	1.09753325686627	1.7513899134387667	1.8210336567680012	1.9340512451237069	1.872737234714641	TRUE	FALSE	chr9_108900000_109550000	TAD_UP	1
ENSG00000137094	DNAJB5	activated	0.01532942164638977	0.4481877863989101	0.9032084518078436	1.7554718298961796	1.4752426790118836	1.5166754404160934	1.6829445232926217	FALSE	FALSE	chr9_34650000_35650000	TAD_BALANCED	0.666666666666667
ENSG00000107249	GLIS3	activated	0.07921532394931531	0.1465628690727855	0.1984794083274245	1.1060240343547498	1.2252909901108593	1.135411136361901	0.9043785255170286	FALSE	FALSE	chr9_3700000_4400000	TAD_UP	1
ENSG00000148154	UGCG	activated	0.07131400911617712	0.622727926499008	0.5326242988947322	0.9148647826549384	0.8702892778334218	0.9977574913749452	1.0672307923312665	TRUE	FALSE	chr9_111700000_112100000	TAD_UP	1
ENSG00000198121	LPAR1	activated	-0.01149938461230888	-0.03683379457858105	0.3389675452048375	0.436865218940171	0.5781887269307376	0.7445991704993106	0.8468444608704206	FALSE	FALSE	chr9_110150000_111400000	TAD_UP	1
ENSG00000110328	GALNT18	activated	0.14970671545803776	0.2605365530481685	0.35987842744008647	1.1413831522397702	1.074153859367288	1.3648793569906856	1.3873647644218896	TRUE	FALSE	chr11_10750000_12300000	TAD_BALANCED	0.666666666666667
ENSG00000135378	PRRG4	activated	-0.07602376879664098	0.7268705405762101	0.807156703004016	1.5577814071529044	1.4982260265718277	1.5232955131161916	1.384590423202041	FALSE	FALSE	chr11_32300000_36550000	TAD_UP	1
ENSG00000184669	OR7E14P	activated	0.08287313191720426	0.7773336904080633	0.7210715155661703	1.7122702402117695	1.675496746397503	1.70936697195006	1.7323093573429902	TRUE	FALSE	chr11_16750000_17100000	TAD_UP	1
ENSG00000166689	PLEKHA7	activated	-0.08964894362650955	-0.03609621964654491	0.8111907874152904	1.8260264335404064	1.9645121454551653	2.0619693131651378	2.009139359241225	TRUE	FALSE	chr11_16750000_17100000	TAD_UP	1
ENSG00000255133	LINC02721	activated	1.807665068620235	-0.4747955258409079	2.426137664419485	2.934683030815928	3.442392730434598	3.370658055495357	3.4222513360418247	FALSE	FALSE	chr11_32300000_36550000	TAD_UP	1
ENSG00000166016	ABTB2	activated	-0.02460061585896903	-0.09624651725558124	1.2089827626859593	1.2295623286688386	1.1038444507104457	1.1546189105443232	1.0820293056012482	TRUE	FALSE	chr11_32300000_36550000	TAD_UP	1
ENSG00000205177	C11orf91	activated	0.7902005565291745	0.5341468044792231	2.0923865626847493	2.044413304768809	2.581875129188352	2.2391640668151083	2.048426709238212	TRUE	FALSE	chr11_32300000_36550000	TAD_UP	1
ENSG00000124942	AHNAK	activated	0.18237134021368911	0.34182008313079143	0.9326984942714168	1.0713861845509056	1.174444124000627	1.5301831106932544	1.2325935938982868	TRUE	FALSE	chr11_62400000_62600000	TAD_UP	1
ENSG00000167995	BEST1	activated	0.01916813090893368	-0.18060695269867968	0.826923877469366	1.46890702176121	2.1480814510229225	2.2698614327218856	2.1832534279101767	TRUE	FALSE	chr11_61750000_62150000	TAD_UP	1
ENSG00000179241	LDLRAD3	activated	0.04176340370162993	0.13092795943434837	0.01153476467052087	0.7027203009656275	0.732392018420276	0.9377231754021118	0.9630197687056392	FALSE	FALSE	chr11_32300000_36550000	TAD_UP	1
ENSG00000284969	NA	activated	0.6549215123092991	1.3727317173636906	2.1533166786006546	1.311555508207333	1.8005401239347136	0.6980424511755181	1.6307937693775758	TRUE	FALSE	chr11_32300000_36550000	TAD_UP	1
ENSG00000172927	MYEOV	activated	-0.1497974789832343	0.35493925078616834	0.5839039763112538	0.6363156226896938	0.8281225519251888	0.863293823910583	0.9249819574153352	TRUE	FALSE	chr11_67600000_72800000	TAD_UP	0.857142857142857
ENSG00000184384	MAML2	activated	0.06608323089991622	0.02810800050672573	0.1659709743637657	0.8600319836957251	0.783807600929121	0.7156224717540007	0.7258707664195424	TRUE	FALSE	chr11_95800000_96400000	TAD_UP	1
ENSG00000110218	PANX1	activated	0.08971290820052734	0.3080045373264531	0.5136249809240984	0.9430769247430392	0.996663986198369	0.9669132656819338	0.9857118823622564	FALSE	FALSE	chr11_93800000_94550000	TAD_UP	1
ENSG00000250519	NA	activated	-0.4207409558035823	0.5630972159169358	-0.2333596727044192	0.33388760133612655	0.6973015647341858	0.732793853276017	0.8895099270071832	FALSE	FALSE	chr11_93800000_94550000	TAD_UP	1
ENSG00000023445	BIRC3	activated	0.4842254978837807	1.9386620637473897	1.806793319939186	1.8411574548800016	1.8013357564442745	1.5990477080976844	1.7705886137158329	TRUE	FALSE	chr11_102250000_102700000	TAD_UP	0.857142857142857
ENSG00000149289	ZC3H12C	activated	0.21191181994777147	0.5736812665373121	0.5450662610693666	0.7787059163642367	0.7901224769439052	0.9719076577922464	0.9181960923066794	FALSE	FALSE	chr11_109950000_110200000	TAD_UP	1
ENSG00000137486	ARRB1	activated	-0.13467051679182238	-0.27650331263206884	1.1980703494706637	1.8944867789260753	2.160881980525713	2.382968876318518	2.2469843706332773	TRUE	FALSE	chr11_75250000_75400000	TAD_UP	1
ENSG00000014138	POLA2	activated	-0.0619710504386381	-0.2952015883721215	0.8263112810171225	0.21155737617346868	0.04924549168813007	-0.0892473636163183	-0.3631969352309009	FALSE	FALSE	chr11_65250000_65350000	NA	NA
ENSG00000110721	CHKA	activated	0.04047094812740097	0.10087804694885068	0.572295080204673	0.9235423294434404	0.8899552666444372	1.0391025740412074	0.9400475809877714	FALSE	FALSE	chr11_67600000_72800000	TAD_UP	0.857142857142857
ENSG00000196167	COLCA1	activated	1.6811013242126287	1.55428179034058	2.8283179057882624	2.586724458778841	1.717414978982518	2.1671927623760667	0.5345788497473241	TRUE	FALSE	chr11_110400000_111500000	TAD_UP	1
ENSG00000254416	LINC02732	activated	0.19510941329871911	0.2645315762619435	0.7899451388024078	0.4244073447788886	0.451978212618436	0.26350509560101265	0.5220898941463015	FALSE	FALSE	chr11_110200000_110400000	NA	NA
ENSG00000174804	FZD4	activated	0.32708491855208055	0.389983762618522	0.9239696881916608	0.7232743823384273	0.9885662311322392	1.1143500830362931	1.006794337081985	FALSE	FALSE	chr11_85550000_87050000	TAD_BALANCED	0.4
ENSG00000137699	TRIM29	activated	0.42502810698710375	0.7568745427143152	1.681980529601936	1.4870361122983349	2.2187099262332093	2.2725732581950115	2.4111200464953724	FALSE	FALSE	chr11_119400000_120350000	TAD_UP	1
ENSG00000131620	ANO1	activated	0.13406618238700033	0.17787355130062943	0.6236902660532079	0.6895109535768621	1.6893058895397928	1.6447496047204249	1.3528470227030824	FALSE	FALSE	chr11_67600000_72800000	TAD_UP	0.857142857142857
ENSG00000036672	USP2	activated	0.271476757820477	0.4282110467555296	1.3294225830072242	1.621362744092942	1.6280658183175618	1.6609783854220237	1.894604612342689	FALSE	FALSE	chr11_119300000_119400000	TAD_UP	1
ENSG00000134917	ADAMTS8	activated	0.8635382288937263	0.833481212983426	1.0064534791308728	2.252179692231159	1.778714013506396	2.2944619501693393	2.355931750969104	FALSE	FALSE	chr11_130400000_130900000	TAD_UP	1
ENSG00000109846	CRYAB	activated	-0.08587029766342306	0.05551497352823036	0.3336628394902175	0.509985579514944	0.4012518947587992	0.6524752775505532	0.8825140983765976	FALSE	FALSE	chr11_111850000_112100000	TAD_UP	1
ENSG00000214026	MRPL23	activated	0.12393903344342244	-0.26425734552808017	0.85719142211119	0.35964749343107855	0.2130471591645141	0.1283833532104913	0.01495532065157556	FALSE	FALSE	chr11_1650000_1950000	TAD_UP	1
ENSG00000121671	CRY2	activated	0.19625568824132963	0.6925963163238429	1.4165231321287757	1.1177628692176445	1.357924955155754	1.297873350708726	1.5357049284545912	FALSE	FALSE	chr11_44050000_45850000	TAD_BALANCED	0.333333333333333
ENSG00000167994	RAB3IL1	activated	-0.0303388364838815	-0.1831598254058048	0.4092599499423876	0.902244132957608	0.6821834575888043	0.8733693659157071	0.8602002310640707	FALSE	FALSE	chr11_61750000_62150000	TAD_UP	1
ENSG00000080854	IGSF9B	activated	-0.2159088306022229	-0.5963714094246209	0.42401301671105374	0.293145269035927	0.7600042429916731	0.8983097524858279	0.3754464788348136	FALSE	FALSE	chr11_130900000_135086622	NA	NA
ENSG00000166833	NAV2	activated	0.10299562048888698	0.24805333632230583	0.6997168906590635	1.1278349229798097	1.2682622788132367	1.402930535931574	1.18018971746918	FALSE	FALSE	chr11_19000000_20400000	TAD_UP	1
ENSG00000166741	NNMT	activated	0.08327941851266805	0.3310042392225412	0.3778689465099289	0.825367238568874	0.9955487770104776	1.3871398212693	1.4595319848931934	TRUE	FALSE	chr11_112200000_116750000	TAD_UP	1
ENSG00000133328	PLAAT2	activated	2.9296596091882847	3.976889473863683	4.218530874944327	4.557913402948601	5.172933150267368	4.865288339924597	4.313541237824893	TRUE	FALSE	chr11_63500000_63650000	TAD_UP	1
ENSG00000173432	SAA1	activated	-1.65209894451692	-1.3327965847366907	-2.1981896693454037	1.4445741308492364	2.4566418461391404	1.9420051357782215	2.9413929476230054	FALSE	FALSE	chr11_18050000_18850000	TAD_UP	1
ENSG00000254815	LMNTD2-AS1	activated	0.5313163961273615	0.2745395528382381	1.2544973220951792	1.9339647731349456	2.052834848389023	2.1875007571020153	2.1480178158453884	FALSE	TRUE	chr11_550000_750000	TAD_DOWN	0
ENSG00000187726	DNAJB13	activated	0.574331558432163	-0.40425053462091154	0.23690627429949015	1.516009286231556	1.0677773468101148	0.7865480321062586	1.4940394640523609	TRUE	FALSE	chr11_73950000_74600000	TAD_UP	1
ENSG00000175634	RPS6KB2	activated	-0.02479341831108715	-0.14740182614790912	0.7945824461408278	0.2262574712721739	0.15123727567832604	0.1599480344078792	0.07388634670801945	FALSE	FALSE	chr11_67350000_67500000	TAD_DOWN	0
ENSG00000149016	TUT1	activated	-0.06161659152707315	-0.1664926713183464	0.8823008291266493	0.29008641675631697	0.09684479776768974	0.3398419645075611	0.18889935674122765	TRUE	FALSE	chr11_62400000_62600000	TAD_UP	1
ENSG00000165916	PSMC3	activated	0.10007445746989334	0.12576652470663732	0.9369473054192548	0.4657070812460775	0.07490739160686592	0.12520486772253872	-0.0027095641536746	FALSE	FALSE	chr11_47350000_47450000	NA	NA
ENSG00000188211	NCR3LG1	activated	0.38107478105055376	0.5987595066391505	0.7353698696818921	0.605612632853221	0.7177113154268844	0.9925313060166076	0.673496037162197	FALSE	FALSE	chr11_17350000_17550000	TAD_UP	1
ENSG00000109906	ZBTB16	activated	0	1.1074617632945396	4.007074343222535	6.214970508729996	6.573648613406564	7.37794310087354	7.9419665693080574	FALSE	FALSE	chr11_112200000_116750000	TAD_UP	1
ENSG00000187486	KCNJ11	activated	0.3237443767225562	1.2976609567519697	3.276723325781232	4.022800976393747	3.7314853878996113	3.6029125587486734	3.235609877435196	FALSE	FALSE	chr11_17350000_17550000	TAD_UP	1
ENSG00000006071	ABCC8	activated	0.2927319462834381	-0.15202519612022455	0.6583007244826806	2.225829027905961	2.762446325371797	2.842844432689066	2.9254189149747947	TRUE	FALSE	chr11_17350000_17550000	TAD_UP	1
ENSG00000133895	MEN1	activated	0.09418165784869714	-0.4324517560296749	0.9378870701342228	0.42928394774401624	0.15521065487504832	-0.02265129106936624	0.01322844228674098	FALSE	FALSE	chr11_64750000_65150000	TAD_DOWN	0
ENSG00000129757	CDKN1C	activated	0.35182464336670066	1.2772577129668006	4.042662761545828	5.08250614190434	5.400440184417257	5.727911269457316	5.558543817351051	FALSE	FALSE	chr11_2150000_3250000	TAD_UP	1
ENSG00000133816	MICAL2	activated	-0.00705821432872947	0.05436035631955609	0.48475389505040234	0.8539315171346759	0.9031922248305844	1.0569134019812956	0.9807911589553524	TRUE	FALSE	chr11_10750000_12300000	TAD_BALANCED	0.666666666666667
ENSG00000186174	BCL9L	activated	0.1969134524493794	0.05692943504668043	0.4805241876248664	0.6108199140752962	0.60469786810312	0.8205112825573293	0.6703080487349441	TRUE	FALSE	chr11_118650000_119000000	TAD_UP	1
ENSG00000151240	DIP2C	activated	-0.03925137911807785	0.09181257197661524	0.2596859631935944	0.7154631343807607	0.7110926430651279	0.9357216762850616	0.8617772275757432	FALSE	FALSE	chr10_50000_1050000	TAD_UP	1
ENSG00000148426	PROSER2	activated	0.05565474710627014	-0.07266065503740962	0.6135870918701287	1.0480549885080792	0.7934234658325371	0.9052354442267312	0.9257839934329906	FALSE	FALSE	chr10_11750000_12050000	TAD_UP	1
ENSG00000122912	SLC25A16	activated	0.10366551440721912	0.5261117896340877	0.6612160092259505	1.0335438300147104	1.0968257052207906	1.2065043561822346	1.3493052895636295	FALSE	FALSE	chr10_68350000_68950000	TAD_UP	1
ENSG00000165757	JCAD	activated	0.0728865899821479	0.6875265776330755	1.3761428392443809	2.049734155781183	1.9898551763361416	2.1767034390623268	2.0549078446685387	FALSE	FALSE	chr10_30000000_30350000	TAD_UP	1
ENSG00000107731	UNC5B	activated	0.15288115227990284	-0.12917633537849968	2.396141233486036	3.386175995862162	4.058889355653618	4.17573902581387	3.9858276443531566	FALSE	FALSE	chr10_70400000_71850000	TAD_UP	1
ENSG00000119938	PPP1R3C	activated	0.21687391906173537	0.06806357692763253	-0.20878246646929555	0.47249526239841255	0.4901790316076431	0.8016753329220492	0.8437084332922454	TRUE	FALSE	chr10_90850000_91950000	TAD_UP	1
ENSG00000107551	RASSF4	activated	0.11862569666163082	-0.02882136917089241	1.230193652810557	1.957349705653821	2.3957769714040738	2.532618243516412	2.658776269033984	FALSE	FALSE	chr10_43500000_45000000	TAD_UP	1
ENSG00000151151	IPMK	activated	0.05864946997220093	0.6987226209150308	0.6079945041169588	0.907453653777703	1.090921736459239	1.3371726723198054	1.314153571642385	FALSE	FALSE	chr10_58150000_60100000	TAD_UP	1
ENSG00000120057	SFRP5	activated	-2.1988935614221936	0.24527327652316416	1.769912496101362	2.3333311436233863	3.2425255517802274	3.038795493672607	3.1517270762150114	TRUE	FALSE	chr10_97750000_99650000	TAD_BALANCED	0.5
ENSG00000122863	CHST3	activated	0.03104690993511001	0.35763952261716125	0.7745477590674767	0.8358009996044199	0.6809722413355443	0.5784331686212957	0.40160281927245867	TRUE	FALSE	chr10_71850000_72350000	TAD_UP	1
ENSG00000155254	MARVELD1	activated	0.07672587366323605	0.2425470173622788	0.22288897838759528	0.536824832435126	0.5609597236199918	0.8745887453209815	1.0030946514843315	TRUE	FALSE	chr10_97650000_97750000	TAD_UP	1
ENSG00000241935	HOGA1	activated	-0.24212070723769724	-0.2864937087253996	0.2844430814534015	0.9924720778663334	0.9982322347347624	1.522388491158691	1.4958543076497313	FALSE	FALSE	chr10_97400000_97650000	TAD_BALANCED	0.666666666666667
ENSG00000107438	PDLIM1	activated	-0.05016252911263489	0.3156501301809215	0.53218251803341	0.9284332953432464	0.9587174103197008	1.1583758905753851	1.132915407043572	TRUE	FALSE	chr10_94550000_95650000	TAD_UP	1
ENSG00000165507	DEPP1	activated	0.5812030552666633	0.7388331548944447	1.2318979208081025	0.6249096979064379	1.359781839241683	0.6007418274921885	0.3048252424115765	FALSE	FALSE	chr10_43500000_45000000	TAD_UP	1
ENSG00000165879	FRAT1	activated	-0.26271871400693386	-0.13978131263499988	0.8507893284137483	0.8447361507193794	0.6178503072405089	0.5873075616738264	0.7783562044800123	FALSE	FALSE	chr10_97250000_97400000	TAD_UP	1
ENSG00000180628	PCGF5	activated	0.07527232893161258	0.19765116729959223	0.2070140845697044	0.5786457963371313	0.6650493111820305	0.8369140936987759	0.86075774187723475	TRUE	FALSE	chr10_90850000_91950000	TAD_UP	1
ENSG00000072422	RHOBTB1	activated	0.2517222608573321	0.5161721318941835	1.2382978380219187	1.241851247881437	1.1723844865682829	1.1606457886868928	0.8462390438786764	FALSE	FALSE	chr10_60800000_61200000	TAD_UP	1
ENSG00000156671	SAMD8	activated	0.02970384690431108	0.2426455886593722	0.342633475550944	0.7682413297241012	0.9267153650542396	0.9694751170515372	0.939366688569588	FALSE	FALSE	chr10_74150000_75250000	TAD_UP	1
ENSG00000148841	ITPRIP	activated	0.1811261227646428	0.6515563251713956	1.034729153032539	0.741387505030782	0.7399346089743905	0.3777636808320557	0.2474393662497955	TRUE	FALSE	chr10_104250000_104400000	TAD_UP	1
ENSG00000107593	PKD2L1	activated	-0.3354521139801617	-0.31976894073511825	0.5157737024872727	1.443124683690887	1.3380216494063792	0.8284980651049649	1.6273942070972247	FALSE	FALSE	chr10_100250000_100550000	TAD_DOWN	0.25
ENSG00000181274	FRAT2	activated	-0.02090105983797181	0.7686031709402258	0.980227531765288	0.877608111910914	1.099671901111096	1.0775919335565316	1.2591131322922338	FALSE	FALSE	chr10_97250000_97400000	TAD_UP	1
ENSG00000188916	INSYN2A	activated	0.09084036311180176	0.2983530567407809	0.9338217304580012	1.2069826602798883	1.4176721383392663	1.5661940686108276	1.36267411983742	FALSE	FALSE	chr10_119900000_132150000	TAD_UP	0.785714285714286
ENSG00000203867	RBM20	activated	-0.10846562931567096	0.11464048842432038	0.9141592896222857	1.5930003126285848	1.5613236355729172	1.995406691588514	1.955197777545563	TRUE	FALSE	chr10_110600000_110900000	TAD_UP	1
ENSG00000043591	ADRB1	activated	0.3111725751221774	0.8276978699110218	0.898074996921509	0.8450229954773726	0.8429348947227804	0.3992250821068345	0.2841885558812155	FALSE	FALSE	chr10_113650000_114150000	NA	NA
ENSG00000148677	ANKRD1	activated	0.20851241715668353	0.9417032725910326	1.3229115938854945	2.3834725327959028	2.0855396243617492	2.150359303965828	2.2912407830747656	FALSE	FALSE	chr10_90850000_91950000	TAD_UP	1
ENSG00000152463	OLAH	activated	-2.030500490932016	1.4554068163836396	2.8294785903350967	4.129264114173228	4.762213256154366	5.48749725560403	5.45578687805143	FALSE	FALSE	chr10_13150000_15400000	TAD_UP	0.833333333333333
ENSG00000151929	BAG3	activated	0.10153733885755448	0.35842552676115025	0.9840219778942584	0.9693993214828164	0.8151128174907117	0.6761796175702331	0.6565534001291676	TRUE	FALSE	chr10_119550000_119900000	TAD_UP	1
ENSG00000189014	SHLD2P3	activated	0.15255367962432084	0.07374800742521952	0.6448241518471485	0.8307772493653381	0.9689589816085328	1.1614981832772122	1.3800206578290888	FALSE	FALSE	NA	NA	NA
ENSG00000226964	RHEBP2	activated	-0.4486337826396743	0.5223791413130471	0.9985704319374784	0.846838273074521	0.6796722978710144	1.0030228570093291	1.022158368946164	TRUE	FALSE	NA	NA	NA
ENSG00000273760	NA	activated	0.12850390655111943	0.9417852123657616	1.1137080203461038	0.9310936537626344	0.34340082193409	0.8130141970761179	0.8336187325205693	FALSE	FALSE	NA	NA	NA
ENSG00000122862	SRGN	activated	0.20454954128230304	0.4708386140894434	1.0128479494512432	1.4303102464975523	1.4361705561772096	1.7448454026678586	1.8670711495549848	TRUE	FALSE	chr10_68950000_69200000	TAD_UP	1
ENSG00000078114	NEBL	activated	-0.10692531721530724	0.16071918329362123	-0.0128684042766764	0.24232305457752432	0.5054230645729216	0.6017284622581863	0.8322604109014239	FALSE	FALSE	chr10_20800000_23100000	TAD_UP	0.857142857142857
ENSG00000250959	GLUD1P3	activated	0.2238880467671542	0.3322364853188077	-0.23700260620158453	0.6044383731055243	0.2578532195468613	0.6427010569205323	1.1373242847016185	FALSE	FALSE	chr10_73700000_73800000	TAD_DOWN	0
ENSG00000273001	PFKP-DT	activated	0.7774180513560819	0.7445231998478665	1.1314993708157934	1.5162826870990158	0.3435685692588106	0.8602210616231682	1.2273750089650894	TRUE	FALSE	chr10_3050000_3150000	TAD_UP	1
ENSG00000152779	SLC16A12	activated	0.2117634689681386	-0.2581313242019629	1.5941173659188193	4.568281216699724	4.502003371837787	5.062052809206387	5.332384649052283	TRUE	FALSE	chr10_89400000_89600000	TAD_UP	1
ENSG00000168209	DDIT4	activated	0.3372155763336783	0.3968084426226101	1.2255106663677946	1.3516250870236732	1.181382866986333	1.2402485202804396	1.1359770745230735	TRUE	FALSE	chr10_71850000_72350000	TAD_UP	1
ENSG00000205740	NA	activated	0.7751236420837725	0.9115283425427784	0.9743837481003502	1.0314561260030009	1.0895407077827457	0.9426817128533824	1.5229846520410513	FALSE	FALSE	chr10_50000_1050000	TAD_UP	1
ENSG00000279406	NA	activated	-0.04140728585959812	0.08870208486912676	0.7671116650988884	0.9719630969672411	0.8804653932510703	0.7689685781762026	0.47043573794869115	TRUE	FALSE	chr10_70400000_71850000	TAD_UP	1
ENSG00000198964	SGMS1	activated	-0.0335643127711602	0.26436380599784715	0.832350527667937	1.105029668959639	1.090201899884229	1.0363753242655045	1.0464938726413635	FALSE	FALSE	chr10_50250000_50700000	TAD_UP	1
ENSG00000272734	ADIRF-AS1	activated	-0.03000482063669316	0.2357415980060228	0.5721123615840743	0.8125918966057142	1.1402123308830143	0.9610590900206208	1.2733275008734175	FALSE	FALSE	chr10_86900000_87250000	TAD_UP	1
ENSG00000197142	ACSL5	activated	0.5434746264585059	0.6951199547665262	2.496890572459133	2.151247835860244	3.3444496438983813	3.062546278050934	3.5798538018223436	TRUE	FALSE	chr10_111000000_112400000	TAD_UP	1
ENSG00000198915	RASGEF1A	activated	-0.15211677276163327	-0.12027665059975431	0.427638601650858	0.7911332294272392	0.6872608226825098	0.6351399210617187	0.46088796168432977	FALSE	FALSE	chr10_43150000_43500000	TAD_UP	1
ENSG00000111732	AICDA	activated	0.6213413711460117	1.3129721484016954	-1.0280851720497977	1.3458815236936204	2.0169209861963564	1.5397289401133192	2.078705482245414	TRUE	FALSE	chr12_8500000_9100000	TAD_UP	1
ENSG00000059804	SLC2A3	activated	0.15402327238501434	0.19981750692932312	0.6406777035910304	0.5936851859305347	0.7293435824191514	0.7786455529661923	0.5707009883551436	FALSE	FALSE	chr12_7850000_8050000	TAD_BALANCED	0.6
ENSG00000166532	RIMKLB	activated	0.1738772559912397	0.06534461229755485	0.3024658240158483	0.4879726052610257	0.5453951273335975	0.7284455464914387	0.8085133554662082	TRUE	FALSE	chr12_8500000_9100000	TAD_UP	1
ENSG00000011105	TSPAN9	activated	0.10327429582375083	-0.04934812521255792	0.4965750532749947	0.8469054943969638	0.6364664192502282	0.8824891693592872	0.7685388020936509	FALSE	FALSE	chr12_1800000_6300000	TAD_BALANCED	0.6
ENSG00000256615	NA	activated	-0.05061347689386077	-0.0486089588918542	1.6402998695903233	1.4787490856192886	1.9003193104391112	1.6910003214388167	1.4591862979988268	TRUE	FALSE	chr12_19350000_21700000	TAD_UP	0.95
ENSG00000111186	WNT5B	activated	-0.04356195284527942	-0.13415489918705564	0.37295491901447614	0.9969481452257514	0.67973814164008	0.9968952417669288	0.7569651092364443	FALSE	FALSE	chr12_1100000_1600000	TAD_UP	1
ENSG00000285517	NA	activated	0.16156822759740072	0.5008994582057185	0.27421014640735486	0.7438475456255281	0.6329622050558624	0.9477390559760432	0.8465653327319885	FALSE	FALSE	chr12_29000000_31250000	NA	NA
ENSG00000161638	ITGA5	activated	0.03125038208064269	0.1042377945287	0.8103532471507736	1.57485046200196	1.4499434285912365	1.7484112153712206	1.8043940071570903	TRUE	FALSE	chr12_54350000_54450000	TAD_UP	1
ENSG00000170523	KRT83	activated	-0.09024424878441906	-0.35116875429827493	1.3181146266791024	0.6546539596072319	0.10033601562108065	0.02679414232645644	-0.3834541883375555	FALSE	FALSE	chr12_52000000_53050000	TAD_UP	0.75
ENSG00000270344	POC1B-AS1	activated	0.2569087724397311	0.9079674774008468	1.1298507417215475	0.8097330024303412	1.260281701912947	1.2669394342747449	1.1998385876480862	TRUE	FALSE	chr12_89500000_90250000	TAD_BALANCED	0.666666666666667
ENSG00000236349	SUCLG2P2	activated	0.4931885176073672	0.34796253519208986	2.2663582619580405	0.799272130155249	1.1489304833451968	1.039434517924272	0.8263085222380135	FALSE	FALSE	chr12_93450000_95550000	TAD_UP	0.888888888888889
ENSG00000084110	HAL	activated	0.6260693412432429	0.9298736878549816	1.275638994853478	1.4963912942704871	2.6734826740292057	3.0998110861449786	3.1730090172667587	TRUE	FALSE	chr12_95850000_96000000	TAD_UP	1
ENSG00000205420	KRT6A	activated	0.3972424341917039	1.5297986514869697	2.704215703081444	3.481796957908752	4.302168728145391	5.087587637053664	5.6286127346153485	TRUE	FALSE	chr12_52000000_53050000	TAD_UP	0.75
ENSG00000057704	TMCC3	activated	0.1761269224597528	0.35732481300384183	0.7841842707265808	0.25709366926772254	0.7540893413876109	0.572046582648847	0.7268182574418969	FALSE	FALSE	chr12_93450000_95550000	TAD_UP	0.888888888888889
ENSG00000158104	HPD	activated	0.4888842168855672	0.3262411178801003	1.6850997181130611	1.8895249302486508	1.9970084106995152	2.131013469211647	1.6408987990132209	FALSE	FALSE	chr12_121800000_121900000	NA	NA
ENSG00000049130	KITLG	activated	0.08589800960509524	0.21081250041885577	0.30842645285040093	0.25350540774527613	0.5627549301085623	0.8895614401377082	1.0354019686108191	FALSE	FALSE	chr12_88100000_89000000	TAD_UP	1
ENSG00000257594	GALNT4	activated	0.5676490743486197	1.3032703424364045	1.8775658193546068	1.5044352479887635	1.9432598486624175	1.249740720840801	1.0148517049090238	TRUE	FALSE	chr12_89500000_90250000	TAD_BALANCED	0.666666666666667
ENSG00000111727	HCFC2	activated	-0.0972815061155945	0.23957754827813785	0.03352334377815721	0.39008597844378495	0.5202532612988707	0.6535881514435847	0.7737243693829919	FALSE	FALSE	chr12_103850000_105150000	TAD_UP	0.75
ENSG00000123364	HOXC13	activated	-0.10022736953585218	0.3589250513770469	0.28669991935428213	1.2210705903986383	1.0281056941797353	0.9002154329534091	0.9353090170035652	TRUE	FALSE	chr12_53700000_54250000	TAD_UP	1
ENSG00000198774	RASSF9	activated	0.27111939605017005	1.204739818615266	0.9699546241203753	0.8906449264297335	1.1352272660389937	1.122556065141462	1.163930915282362	TRUE	FALSE	NA	NA	NA
ENSG00000256268	LINC02454	activated	0.40045777131785903	1.3746807777443013	1.754699565896252	2.6895109775739505	2.710608509233298	2.8140846269067006	3.1076107305401917	FALSE	FALSE	chr12_65250000_66150000	TAD_UP	1
ENSG00000111249	CUX2	activated	-0.6950552309060568	0.2240428248427359	-0.977296529729556	1.608371520986397	1.371776394378715	2.889486180635529	3.521978212279389	FALSE	FALSE	chr12_110900000_111350000	TAD_UP	1
ENSG00000249641	HOXC13-AS	activated	0.383271017976513	0.3549770862199944	0.4254723633362446	0.9146193692746296	1.4320563797647536	1.1625441059315986	1.294625512073855	TRUE	FALSE	chr12_53700000_54250000	TAD_UP	1
ENSG00000151136	BTBD11	activated	-0.01037254869400231	-0.195629238680109	0.07838940878136087	0.7538825291799349	0.973326614353854	1.1243383372055702	1.089956841832921	FALSE	FALSE	chr12_107050000_107650000	TAD_UP	1
ENSG00000135111	TBX3	activated	0.270662435558723	0.7272933168550798	0.8301099286300746	1.0083358116452246	1.1728251732789543	1.2727782167568271	1.314999889280032	FALSE	FALSE	chr12_113150000_117200000	TAD_UP	0.875
ENSG00000257327	NA	activated	1.0196450011536196	1.2535170059595666	1.919416672343468	2.3178575905316676	2.3601838596748874	1.9439093052965168	2.5583258307834833	FALSE	FALSE	chr12_103750000_103850000	TAD_UP	1
ENSG00000278266	NA	activated	0.3121527513313702	1.1585281935690923	1.5599492334108347	1.8528932082428848	1.8887124126452968	1.555258285666172	1.4992003089863044	FALSE	FALSE	chr12_125050000_130750000	TAD_UP	1
ENSG00000111696	NT5DC3	activated	-0.04132068646867244	0.49074335348244513	1.3553795654431895	1.9771710365248347	1.8283701974235609	1.883237547585862	1.7725561828708445	TRUE	FALSE	chr12_103750000_103850000	TAD_UP	1
ENSG00000278108	MIR6757	activated	-0.40403451682605435	0.6242158437513158	2.203767588741937	2.3896015726864173	2.684255398075085	2.410275400080218	2.624056178694502	TRUE	FALSE	chr12_53050000_53200000	TAD_UP	1
ENSG00000205885	C1RL-AS1	activated	0.03510238560819558	0.16994172920310543	0.39527894997606267	0.40616840368796026	0.6380834127709001	0.7084287292158387	0.7980680364152362	FALSE	FALSE	chr12_6950000_7200000	TAD_UP	1
ENSG00000135643	KCNMB4	activated	0.7091567358394433	-0.01154813750559398	0.6808382042640759	1.305872743422986	0.7277352600376262	1.9652821029692489	1.7981796444927265	FALSE	FALSE	chr12_69800000_70750000	NA	NA
ENSG00000111077	TNS2	activated	0.07516038216729752	-0.2115802140852864	0.4264889853104132	1.1145586237463576	1.2369423789995049	1.436338931811927	1.41543304287994	TRUE	FALSE	chr12_52000000_53050000	TAD_UP	0.75
ENSG00000011465	DCN	activated	-2.040480171622951	1.4345403889562551	3.2749729229762514	2.9604235771937555	3.025681568997898	2.957856988819968	3.689416426809685	FALSE	FALSE	NA	NA	NA
ENSG00000182796	TMEM198B	activated	-2.461011773798413e-4	-0.05756874786064876	0.13193088768136232	0.3315982876692022	0.576186960359206	0.5732551238025456	0.8109127786776471	FALSE	FALSE	chr12_55700000_56100000	TAD_UP	1
ENSG00000278861	NA	activated	0.33580709784622476	0.7274099239322516	-0.3871257258923555	0.48511030752628154	0.6037578551727331	1.0621290220396011	1.2743060636672543	FALSE	FALSE	chr12_123650000_124950000	TAD_UP	0.9
ENSG00000134531	EMP1	activated	-0.01101985199715841	0.8309256215896539	1.0516200473306554	1.599586130616846	1.9458408529180156	2.229653477301883	2.4129701082147426	TRUE	FALSE	chr12_12750000_14200000	TAD_UP	0.857142857142857
ENSG00000111305	GSG1	activated	0.8508662646699727	2.477716710517743	3.148490017789866	3.616801604023221	3.9702613860468583	3.6798620429069735	3.28747514752606	TRUE	FALSE	chr12_12750000_14200000	TAD_UP	0.857142857142857
ENSG00000076555	ACACB	activated	-0.01574648508262141	-0.04891875324169136	0.655620927914053	1.0370397835748613	1.0569397579231856	1.226293160603398	1.086662862641646	TRUE	FALSE	chr12_109100000_109400000	TAD_UP	1
ENSG00000130787	HIP1R	activated	0.05754153320017496	-0.1390052523779515	0.658077623680386	1.0567980972756523	0.99282146618906	1.0063974487979832	1.158752530281356	TRUE	FALSE	chr12_122800000_122950000	TAD_UP	1
ENSG00000257681	NA	activated	-0.2854603129557644	0.29468614304834895	1.3894417032882138	2.0012728876045145	1.6832164858675729	1.9250042499805025	1.8778643509813395	FALSE	FALSE	chr12_103750000_103850000	TAD_UP	1
ENSG00000135116	HRK	activated	1.2065176950673109	2.1314381985455273	3.3912020285033133	4.735988382483345	4.51584283045057	4.932137445542626	4.913821792752023	FALSE	FALSE	chr12_113150000_117200000	TAD_UP	0.875
ENSG00000111319	SCNN1A	activated	0.10935074660597086	0.04635963917862745	1.2472372992589795	1.6150109073181211	1.883253606294818	2.2065637690978828	2.423737484083598	TRUE	FALSE	chr12_6300000_6550000	TAD_UP	1
ENSG00000256433	NA	activated	0.6053813952248828	0.2655615332949478	0.317392077146455	0.5525257831642578	0.7939514122390962	0.5990021111300315	0.7750758784327068	FALSE	FALSE	chr12_6300000_6550000	TAD_UP	1
ENSG00000149948	HMGA2	activated	0.08260627174087064	-0.09287777271501035	0.3776401533736059	1.0849586803288214	0.8057881624758951	1.1061304153007483	1.1424488624337248	FALSE	FALSE	chr12_65250000_66150000	TAD_UP	1
ENSG00000139631	CSAD	activated	-0.00252387320018793	0.07714087301116651	-0.05617693655813273	0.3876224229471113	0.5803897623747363	0.7285890879664126	0.9285595572021774	FALSE	FALSE	chr12_53050000_53200000	TAD_UP	1
ENSG00000173262	SLC2A14	activated	0.854743219620681	0.6241591552132983	2.246965679838703	3.6435205342012753	3.7771037337678672	4.130712960452138	3.988594731130613	TRUE	FALSE	chr12_7850000_8050000	TAD_BALANCED	0.6
ENSG00000185432	METTL7A	activated	0.16538509866880438	0.2227667907371422	1.9419930807918084	2.1959975031748584	3.266518649020915	3.138894990476809	3.748269813472513	FALSE	FALSE	chr12_50750000_51400000	NA	NA
ENSG00000112787	FBRSL1	activated	0.05139092498505383	-0.03791066652376695	0.5429647147682714	0.8228730717474515	0.8895420628586209	0.8984869915496793	0.7101084160992621	TRUE	FALSE	chr12_132100000_132700000	TAD_UP	1
ENSG00000072041	SLC6A15	activated	-0.1497906527173135	0.0775176122102853	-0.1179673655853114	0.9098438632907248	0.5721760102856048	0.701487979774019	0.8965038761399621	FALSE	FALSE	NA	NA	NA
ENSG00000255644	NA	activated	0.03280429031538622	0.06683506470013502	0.5635377401983809	1.9904017836145136	1.7431009386291572	1.519529569234397	2.053815948529696	FALSE	FALSE	NA	NA	NA
ENSG00000258210	NA	activated	-0.23910734640081568	-0.28792117400109	-0.1430181055605068	0.23098829957724212	0.3428983734617353	0.4668644563090062	0.7845616066253079	FALSE	FALSE	chr12_110000000_110450000	TAD_UP	1
ENSG00000135094	SDS	activated	0.4623729856893793	-0.04533912513830659	0.6891868391822854	1.1657117971353834	0.8753454635443796	2.213858009322808	2.567295811339281	FALSE	FALSE	chr12_113150000_117200000	TAD_UP	0.875
ENSG00000134548	SPX	activated	0.3925776632089332	0.33984060714134157	0.5168295942842254	0.7121225740709598	1.072721832756058	1.450686305442609	1.503203569508554	FALSE	FALSE	chr12_19350000_21700000	TAD_UP	0.95
ENSG00000279233	NA	activated	0.16712385466528534	0.5960457068752781	0.9047448861230132	1.350549739523048	1.386945365614446	1.1280570711039155	1.160150022995837	FALSE	FALSE	chr12_125050000_130750000	TAD_UP	1
ENSG00000090376	IRAK3	activated	0.2777897905313173	0.5559835701515817	2.3457508829845968	3.230406805915263	3.7553983315635	4.293297737222809	4.180024010602364	FALSE	FALSE	chr12_66150000_68300000	TAD_BALANCED	0.5
ENSG00000089159	PXN	activated	-0.08771888810592564	-0.08325141910529622	0.43574103387328167	0.756534267717921	0.778208387823382	0.905081266211438	0.9696905650014596	TRUE	FALSE	chr12_120200000_120300000	TAD_UP	1
ENSG00000184752	NDUFA12	activated	-0.05022884302986191	-0.2509354023436886	0.879353318198353	0.3634082976621997	0.29316216794086647	0.39313395664144873	0.572012508925155	FALSE	FALSE	chr12_93450000_95550000	TAD_UP	0.888888888888889
ENSG00000257497	NA	activated	-0.11062128402516903	0.8772569821248255	0.12406620870432623	0.4712588002063727	0.6765596762475798	0.4865460490821425	0.4973866897562867	FALSE	FALSE	chr12_75350000_76600000	TAD_UP	1
ENSG00000057294	PKP2	activated	-0.01611523501171541	0.13691358770449844	0.6574471130225513	1.2267834231575925	1.5718464884917334	1.8195652957635933	1.8803201791057016	FALSE	FALSE	chr12_32750000_33000000	TAD_UP	1
ENSG00000139132	FGD4	activated	-0.10521790283661876	1.2575311378173435	3.333311738945989	3.601329847346104	3.556546039252241	3.3842046552836544	3.207242551663175	FALSE	FALSE	chr12_31250000_32750000	TAD_UP	0.944444444444444
ENSG00000227879	PSPC1P1	activated	-0.1675246189254346	1.586481456380176	1.9731966104849343	0.6856727102077348	0.7933396886022428	0.6805194602625824	0.8752338511093878	FALSE	FALSE	chr13_18550000_19600000	NA	NA
ENSG00000132952	USPL1	activated	0.138704591301127	0.5495423257281199	0.5484954081436613	0.8113370752530017	0.7292664704681215	0.7795008521652528	0.8175174341187564	FALSE	FALSE	chr13_30100000_31050000	TAD_UP	1
ENSG00000120675	DNAJC15	activated	0.6584568798274745	1.6455042171870244	2.796745075341575	3.962361214095418	4.682251953031646	4.745859770783881	5.056997764748053	FALSE	FALSE	chr13_42300000_43900000	TAD_UP	1
ENSG00000120658	ENOX1	activated	0.18611773389986863	-0.047958054263295	0.4358598124134551	1.5365995750329218	2.0706720627221316	2.8418026954819364	2.705014663002208	TRUE	FALSE	chr13_42300000_43900000	TAD_UP	1
ENSG00000120690	ELF1	activated	0.01412168625172656	0.2733223712001853	1.3896573429164758	1.044505321405153	0.9399204156819652	0.863383084021593	0.8697691239944538	FALSE	FALSE	chr13_41050000_42300000	TAD_UP	1
ENSG00000136155	SCEL	activated	0.06627665641528767	0.4055302511895483	0.6738872437809327	1.142177575535548	1.742126842755748	1.5931542384129165	1.8850780476269615	TRUE	FALSE	chr13_77000000_77600000	TAD_UP	1
ENSG00000234354	RPS26P47	activated	0.2159439273104962	0.1400684968231593	1.4893325190596811	0.7527371848922072	0.07247805810459795	0.30237141110614996	0.04858038460870348	FALSE	FALSE	chr13_99550000_100600000	NA	NA
ENSG00000136153	LMO7	activated	-0.00810624901770901	0.3511106216307744	0.49192876919831674	0.5453434097429299	0.6660701098696062	0.7313887010267602	0.7584899369085918	FALSE	FALSE	chr13_75550000_77000000	TAD_BALANCED	0.5
ENSG00000150907	FOXO1	activated	0.17144316452525912	0.650400712649968	1.0904629069224043	1.5618269089958454	1.6829828103583515	1.8189940838577736	1.7845241842003767	TRUE	FALSE	chr13_39700000_40800000	TAD_UP	1
ENSG00000133121	STARD13	activated	-0.08326622324936396	0.17629387809065503	1.4677023566310348	1.6440657205232514	1.795033445611614	1.680366832071212	1.807491706754833	FALSE	FALSE	chr13_32550000_33750000	TAD_UP	1
ENSG00000278156	TSC22D1-AS1	activated	0.00915813320167546	0.5707967133698298	0.4119337314192853	0.5772381170769239	0.7139248188604213	0.5379387259107102	1.0242975567164558	TRUE	FALSE	chr13_44450000_45000000	TAD_UP	1
ENSG00000275216	NA	activated	0.34584947885148465	0.9100182448640473	0.8244616244316855	1.0059084369556528	1.2834938984329434	1.0561079723746405	1.302656778090659	TRUE	FALSE	chr13_108900000_110200000	TAD_UP	1
ENSG00000122042	UBL3	activated	-0.00482262994412578	0.4430533403565409	0.6022302103430758	0.8268268222268239	0.938185089732266	0.8867470676958991	0.8268354212354522	FALSE	FALSE	chr13_29750000_30100000	TAD_UP	1
ENSG00000152767	FARP1	activated	0.04015968434466445	-0.07961964946160782	0.1198632270826536	0.3974567085549884	0.5992860806590301	0.9791583435373428	1.1649963262378915	TRUE	FALSE	chr13_97800000_98850000	TAD_UP	1
ENSG00000204977	TRIM13	activated	0.0044665981652144	0.45992126152709384	0.3957405493501993	0.47399460283958617	0.6093734927731728	0.6993493895815518	0.8428833063504853	FALSE	FALSE	chr13_49600000_51100000	TAD_UP	1
ENSG00000122035	RASL11A	activated	0.02346104022671759	0.08443760659331159	-0.07968812629264095	0.693966940740129	0.4712597915802949	0.3718577276920488	0.7891728774123435	FALSE	FALSE	chr13_26950000_27350000	NA	NA
ENSG00000080618	CPB2	activated	0.38777314435921606	-0.8558355866186199	-2.176158694739164	0.712451006066168	1.9612724394153436	2.0928691552508765	2.757989903583831	TRUE	FALSE	chr13_45500000_46350000	TAD_UP	1
ENSG00000233695	GAS6-AS1	activated	-0.04634247201866071	0.4228034563509633	0.9436628761942288	0.7722945214469968	0.8433560530041015	0.503705430741923	0.7074785185774319	TRUE	FALSE	chr13_113500000_114300000	TAD_UP	1
ENSG00000125266	EFNB2	activated	-0.2374611121947914	0.68915276876604	1.0016545581566867	0.9640320282800756	1.1540873227205632	1.199630075602964	1.4591614358859233	FALSE	FALSE	chr13_102850000_107200000	TAD_UP	1
ENSG00000102780	DGKH	activated	0.04049121525043325	0.20918869101314863	0.351902424014456	0.6221729344772384	0.886962464813995	1.0082196120769042	0.943380615523145	TRUE	FALSE	chr13_41050000_42300000	TAD_UP	1
ENSG00000132965	ALOX5AP	activated	0.1350839631898447	0.7097195869389411	1.6061683873556598	2.3599128409994683	1.9251689485441896	2.4233797400840653	2.76823446006879	TRUE	FALSE	chr13_30100000_31050000	TAD_UP	1
ENSG00000133106	EPSTI1	activated	0.15095136241456028	-2.7089176144135476	2.4150057661709776	2.693195614730241	2.627638085125557	3.4592544790691244	3.013583038598331	TRUE	FALSE	chr13_42300000_43900000	TAD_UP	1
ENSG00000139832	RAB20	activated	0.5683101560686241	0.7764846309086384	1.9123404631907397	1.899294683601447	1.6917117265523676	1.9248826766664215	1.7094595388565632	FALSE	FALSE	chr13_110450000_110600000	TAD_UP	1
ENSG00000102760	RGCC	activated	0.2226282330897972	1.2613521984037694	1.89360937251966	2.3845658553634363	2.482510647994311	2.525735303659543	2.2562070230249645	TRUE	FALSE	chr13_41050000_42300000	TAD_UP	1
ENSG00000168952	STXBP6	activated	0.0046079153356209	0.23668177241980756	-0.15677222712726763	0.9443337562112802	0.4014067759446543	0.10051522727136976	0.02290430609687077	FALSE	FALSE	chr14_24750000_25150000	TAD_UP	1
ENSG00000100890	PRORP	activated	0.01225408497427313	0.04908201606772716	0.01874434211012815	0.2805216976132979	0.5018315367467541	0.4020355856722534	0.7776832328692627	TRUE	FALSE	chr14_35100000_35450000	TAD_UP	1
ENSG00000214900	LINC01588	activated	0.1653858802792479	0.2509510969796404	0.31613762598690837	0.7017420932215758	0.8111693354767415	0.4443881292314058	0.6222255751183914	TRUE	FALSE	chr14_49850000_50150000	TAD_UP	1
ENSG00000087303	NID2	activated	-0.2801652567080527	-0.17323868809118234	0.04088925268719465	0.5415005566602912	0.7462332422628588	0.5878712934670908	0.8435407895589832	FALSE	FALSE	chr14_52000000_52150000	TAD_UP	1
ENSG00000165527	ARF6	activated	0.03749581550051011	0.3497990233334658	0.5368095998141279	0.7580111350542219	0.6596540138689325	0.923739155234363	0.8968230577696723	TRUE	FALSE	chr14_49850000_50150000	TAD_UP	1
ENSG00000119599	DCAF4	activated	0.16225175206993034	0.10875371599604353	0.7929448336747443	0.578229464428172	0.47319625125686865	0.33371649464076797	0.34648192208683487	FALSE	FALSE	chr14_72450000_72950000	NA	NA
ENSG00000170345	FOS	activated	0.21551594219938905	-0.8427223141837425	0.2780284663670426	0.4581407544012493	0.7144143175659388	0.9990582382821755	0.846304656614624	FALSE	FALSE	chr14_75100000_75300000	TAD_UP	1
ENSG00000165548	TMEM63C	activated	-0.04963057120032185	-0.2967592796359118	0.6709628704209282	2.182441100871898	2.6614669504958486	3.166278510912666	3.240986093270733	FALSE	FALSE	chr14_77100000_77200000	NA	NA
ENSG00000125384	PTGER2	activated	0.7355670392364125	0.5712974911959926	1.2190131400741555	1.4464904891759225	1.401625635460775	1.7732413738781594	1.691305576271214	FALSE	FALSE	chr14_52250000_52500000	TAD_UP	1
ENSG00000175785	PRIMA1	activated	0.3434106605678663	0.7390414618487104	0.7685430156076967	1.7037273565484314	1.443918639882024	2.048873552921755	1.7492241534285855	FALSE	FALSE	chr14_93650000_93900000	NA	NA
ENSG00000089902	RCOR1	activated	-0.05288909589076526	0.1908100956669345	0.44743944905393807	0.812385956583116	0.923791537772496	0.9635115648747088	0.8205136412310787	TRUE	FALSE	chr14_102500000_102600000	TAD_UP	1
ENSG00000168350	DEGS2	activated	-0.1111366343318611	0.1992625981277172	0.6568542124373323	1.258488580859349	0.9544235180930946	1.3373020263935778	1.367052994793246	FALSE	FALSE	chr14_100100000_100200000	TAD_UP	1
ENSG00000196405	EVL	activated	0.03781204130830277	0.02354379660763241	0.3822086640204387	0.775360169377302	0.6071148359032397	0.7727945979819433	0.7295520581982169	FALSE	FALSE	chr14_99900000_100000000	NA	NA
ENSG00000276168	RN7SL1	activated	0.17228396237434238	-1.0705803957142737	2.1023017811606652	0.46075812370651226	-0.17466267422547663	0.04680810451175429	-0.05831547248013184	FALSE	FALSE	chr14_49550000_49650000	TAD_UP	1
ENSG00000092068	SLC7A8	activated	-0.19697482413172027	0.04758838243836343	1.2691095817902651	1.7722456275309697	2.659462039529766	3.466118834904592	2.7584857358211017	FALSE	FALSE	chr14_23100000_23250000	TAD_UP	1
ENSG00000092051	JPH4	activated	3.2762906886790986	1.1074668583381253	3.9976951762694366	6.277168387979361	6.970743397203761	6.40020564559324	6.720113337746184	FALSE	FALSE	chr14_23450000_23600000	NA	NA
ENSG00000269906	NA	activated	0.1788906903213433	0.4501714290018546	0.9613318027360418	0.5938951824036826	0.4577826938823963	0.554681495463491	0.2826999305058789	TRUE	FALSE	chr14_50550000_50800000	TAD_UP	1
ENSG00000119630	PGF	activated	-0.39530141166917593	-0.22637663848093367	0.35955803073819315	1.3224964653693587	0.8675135243378355	0.4433562256190518	0.03982676136792327	FALSE	FALSE	chr14_74900000_75000000	NA	NA
ENSG00000196136	SERPINA3	activated	2.7274336358509026	2.8437732691933593	3.630356478522614	2.676985146001067	4.115069320560754	4.089188553925892	4.4484626951524815	TRUE	FALSE	chr14_94350000_95550000	TAD_UP	1
ENSG00000166165	CKB	activated	0.14891339829520223	0.5464209936462867	1.4780800272767862	2.1116815726018885	1.9239087072867584	2.1269692936841507	2.0837030778966583	TRUE	FALSE	chr14_103500000_103600000	TAD_UP	1
ENSG00000260285	NA	activated	0.9175364561382038	0.936116180350352	1.5857709789705527	0.6122216854896377	1.5076362161036825	1.3839613798550552	1.3275885761077706	FALSE	FALSE	chr14_103500000_103600000	TAD_UP	1
ENSG00000165959	CLMN	activated	0.0148256563303978	-0.16370145937573505	0.35201273155597435	0.2972940042540295	0.7855257915300252	0.7682037017800308	0.5580751701616038	FALSE	FALSE	chr14_94350000_95550000	TAD_UP	1
ENSG00000140022	STON2	activated	0.20585288460171353	0.5231700900713027	1.1023004781152963	1.3967276898943306	1.421415190599628	1.30938280413038	1.1953219792915593	FALSE	FALSE	chr14_81250000_81450000	TAD_UP	1
ENSG00000119686	FLVCR2	activated	0.06724860687581538	0.4660444506898878	1.8004695222953635	1.995256121806643	2.2349032602575445	2.507058264482078	2.456260121485757	FALSE	FALSE	chr14_75500000_75600000	TAD_UP	1
ENSG00000151327	FAM177A1	activated	-0.06290604436797292	0.28336160865513327	0.17086991816036368	0.4780261833205049	0.5970739799520989	0.7805214110489054	0.873774381205002	TRUE	FALSE	chr14_35000000_35100000	TAD_UP	1
ENSG00000155465	SLC7A7	activated	-0.08524435714057689	0.22109302848498408	0.31025875629393856	0.3005080013555153	0.7808763198809529	0.8256876105385491	0.9490586440543802	FALSE	FALSE	chr14_22750000_22850000	TAD_UP	1
ENSG00000100490	CDKL1	activated	0.05219687829315796	0.27064727526643734	0.4826148216065865	0.8217657535121131	0.7994763369519498	0.8761357886418274	0.6886235055015917	FALSE	FALSE	chr14_50300000_50550000	NA	NA
ENSG00000259153	NA	activated	0.1879661113817595	0.29907562528038395	0.26841464880277216	0.4196600708258692	0.5729258925494576	0.6017066769250816	0.830157492975074	FALSE	FALSE	chr14_70800000_70900000	NA	NA
ENSG00000270503	YTHDF2P1	activated	0.8298563403492812	0.3486132269326332	1.6771367254670162	0.5392563347689173	1.0946314606014087	0.2820584541798674	0.4482372138556692	FALSE	FALSE	chr14_39050000_39450000	NA	NA
ENSG00000070182	SPTB	activated	-0.12497502022606467	0.20585204587654277	0.5180810791165998	0.8318265972430295	0.8523725077959086	0.8782780920840364	0.5932472061594034	FALSE	FALSE	chr14_64800000_64900000	NA	NA
ENSG00000206190	ATP10A	activated	0.04362454172516863	0.27795637970529924	0.741673341418698	0.8412630146076103	0.8543036237436126	0.988205418368042	1.1339298717615012	FALSE	FALSE	chr15_25850000_25950000	TAD_UP	1
ENSG00000137801	THBS1	activated	0.2065523827356998	0.5511924696644861	0.8579648437087628	1.1794929862307093	1.1308035653955062	1.4064673424850196	1.2964636842880688	TRUE	FALSE	chr15_38700000_39800000	TAD_UP	0.857142857142857
ENSG00000259330	INAFM2	activated	0.00709882911187452	0.15139488006415275	0.41957216355380333	0.6419900995442195	0.5283669696882158	0.7893924027814186	0.7516379666879713	FALSE	FALSE	chr15_40300000_40400000	NA	NA
ENSG00000104044	OCA2	activated	0.05789926720212466	-0.3095390417444458	-0.0395575589936201	1.069404599529577	0.5441091183311858	1.3717686404992375	1.280220044047854	TRUE	FALSE	chr15_26900000_28150000	TAD_UP	1
ENSG00000150667	FSIP1	activated	0.10973083609757858	0.03863007030624797	0.8185183939385686	0.2471862063357687	0.7219298717901901	-0.00791536789999189	0.2129789655514424	FALSE	FALSE	chr15_38700000_39800000	TAD_UP	0.857142857142857
ENSG00000128917	DLL4	activated	0.6835834601823436	1.670951520030299	1.955214472057228	2.578249127978827	1.7897451399686384	2.4578261032875264	1.664625328027693	FALSE	FALSE	chr15_40900000_41000000	NA	NA
ENSG00000245975	NA	activated	0.211766795399165	0.2536431014473671	0.1823663171641313	0.9506999863658226	0.6515313653876094	0.698301140397306	1.0423622672750763	TRUE	FALSE	chr15_58200000_58950000	TAD_UP	1
ENSG00000198535	C2CD4A	activated	0.973568064539714	1.6680013024096527	1.3374959524480092	1.4469991025741735	1.0170318274011243	0.3207576711907359	0.3318753324015433	FALSE	FALSE	chr15_61850000_62350000	TAD_UP	1
ENSG00000136378	ADAMTS7	activated	0.31588189936608885	-0.332296483257083	0.3750534226624777	1.3400304277857753	1.2695904813845016	1.3775707741124417	1.547662181839663	FALSE	FALSE	chr15_78750000_78850000	TAD_UP	1
ENSG00000140465	CYP1A1	activated	-0.18427167574156955	0.160098647212043	0.3477161556850254	0.5237283576941097	1.0935196662704745	0.7160777917834162	1.1931334861242753	FALSE	FALSE	chr15_74650000_74750000	TAD_UP	1
ENSG00000103966	EHD4	activated	0.01432342837300423	0.246935007121644	0.5305189161785082	0.7952834115880995	0.7495578920472644	0.7639107699147427	0.7690310361098991	TRUE	FALSE	chr15_41950000_42050000	TAD_UP	1
ENSG00000183578	TNFAIP8L3	activated	0.20003582689494456	0.52950264648523	1.5698523894083825	2.4492905649035146	2.396960085701015	2.7066749038121376	2.704848472426723	FALSE	FALSE	chr15_51050000_51150000	TAD_UP	1
ENSG00000237550	NA	activated	-0.01946717462037965	0.08235056671170084	1.1467338109479914	0.23586512699088416	0.06519569926772192	0.08234639089043226	0.16260086200670013	FALSE	FALSE	chr15_82350000_82500000	NA	NA
ENSG00000103942	HOMER2	activated	0.10234737715841538	-0.02515799147554496	0.30960194291054377	0.7013482724721561	0.704178341992226	1.232515645024178	1.19784445887056	FALSE	FALSE	chr15_82950000_83050000	NA	NA
ENSG00000230373	GOLGA6L5P	activated	-0.1436816553389215	0.2968641911769807	-0.11901057941027256	0.5281022852367944	0.6386093719589324	0.738287804363022	0.7605922213403249	FALSE	FALSE	NA	NA	NA
ENSG00000140519	RHCG	activated	0.172471364344386	0.6023638407500687	1.2539089222427695	1.198050686875908	1.2149255692005334	1.7251748475121629	1.755301336369822	TRUE	FALSE	chr15_89400000_89500000	TAD_UP	1
ENSG00000140332	TLE3	activated	0.2930794791070372	0.34955336567686507	1.3128643493195171	1.7215698285780257	1.4398412934530622	1.7466135301935344	1.6413858533753805	FALSE	TRUE	chr15_69450000_70650000	TAD_UP	0.833333333333333
ENSG00000170776	AKAP13	activated	0.10833029763499288	0.41833438603452133	2.068609721444662	2.0275562652865418	2.022390230751849	1.9984465072154851	1.7126902882294783	FALSE	FALSE	chr15_85300000_85500000	TAD_UP	1
ENSG00000140526	ABHD2	activated	0.02518703092850304	0.2678898995821464	0.684154899103128	1.03131736957691	1.147866546848883	1.2566069579229355	1.2506280628813715	TRUE	FALSE	chr15_89050000_89200000	TAD_UP	1
ENSG00000033800	PIAS1	activated	-0.08738946930260623	0.06943606912409571	0.22749525086101435	0.47252613680200994	0.6788331458529657	0.7275891240646459	0.7895006156073983	TRUE	FALSE	chr15_68050000_68150000	NA	NA
ENSG00000166825	ANPEP	activated	0.08758709968722322	0.32272966792596597	0.9709888049839124	2.0136531883704283	2.1040474357043153	2.5010530871120253	2.586803505840372	TRUE	FALSE	chr15_89700000_89900000	TAD_UP	1
ENSG00000138615	CILP	activated	-0.1856539394897924	1.2246882186994568	3.410344526356328	4.55367536582163	4.968868192879563	5.405267452476507	5.487735284791092	FALSE	FALSE	chr15_65150000_65300000	NA	NA
ENSG00000140479	PCSK6	activated	0.0242944654681348	-2.981182079884501e-4	0.30798804490587134	0.37917689840820296	0.541077153774976	0.7706015084047324	0.8104806471074247	TRUE	FALSE	chr15_101300000_101650000	TAD_UP	1
ENSG00000137825	ITPKA	activated	-0.2539833439212941	0.01133365455746808	1.059234607945878	1.8891066290654632	1.7837807884150827	1.956843657865826	1.868233037328738	TRUE	FALSE	chr15_41450000_41550000	TAD_UP	1
ENSG00000092445	TYRO3	activated	0.17237382761645997	0.05179768467337061	0.5717249936068772	0.8636946049567004	0.9208146393224528	1.0156982074677443	0.915380102944341	TRUE	FALSE	chr15_41550000_41650000	TAD_UP	1
ENSG00000189419	SPATA41	activated	0.7623257860829689	0.8299556712750958	1.6519319692933925	0.9568855190492254	1.37671259675789	1.2674925960261776	1.1150885717131187	FALSE	FALSE	chr15_99800000_100600000	NA	NA
ENSG00000252690	NA	activated	0.13627311404904158	0.5711575199748746	0.3759853778774691	0.5837091511027236	0.4424144492369781	0.9160843267999114	0.9536465574115248	FALSE	FALSE	chr15_82750000_82850000	NA	NA
ENSG00000205363	INSYN1	activated	0.6997738316054424	0.00181241818720703	1.1014931115690647	0.9804662654713956	1.240841070604926	0.9634187774447884	0.948305171051128	FALSE	FALSE	chr15_73750000_73850000	NA	NA
ENSG00000069869	NEDD4	activated	-0.12176884422074565	0.33304120765280537	0.44155285356840623	1.109913389793462	1.20410722809575	1.2768550351449413	1.4205608853028329	FALSE	FALSE	chr15_55950000_56050000	NA	NA
ENSG00000167202	TBC1D2B	activated	-0.01590597270773838	-0.01719910495427492	0.4073456438211344	0.5628995548486212	0.7071057295827682	0.8061220600365047	0.7322825493051428	FALSE	FALSE	chr15_77950000_78300000	TAD_UP	1
ENSG00000127585	FBXL16	activated	-0.1883647484118603	-0.5178868120466137	0.20710413237017924	1.5597344761190306	1.8664134565414177	1.8091186359564884	1.9144111146220053	FALSE	FALSE	chr16_650000_750000	NA	NA
ENSG00000276931	NA	activated	0.28865138342662794	0.9346330151706368	1.0669913241745792	0.1571095583865013	0.4791694105928563	0.8540457422597545	1.1390447113813351	FALSE	FALSE	chr16_750000_1300000	NA	NA
ENSG00000005513	SOX8	activated	-0.5697958782355703	0.5543041324412454	1.355398448735034	1.9783630088038353	1.3225111265060658	1.0008723011990084	0.2667668880184753	FALSE	FALSE	chr16_750000_1300000	NA	NA
ENSG00000234769	WASH4P	activated	0.3347347341595363	0.5315224388007518	1.6248103865430474	0.9823954495136624	0.8386758180685359	-0.7072378953551015	0.08255512943002949	FALSE	FALSE	chr16_0_400000	NA	NA
ENSG00000188215	DCUN1D3	activated	0.00805162782042208	0.7779298988761536	0.9404509413008868	1.366209293853652	1.3391457854647515	1.3458336891501292	1.3776896969481045	TRUE	FALSE	chr16_20750000_21150000	TAD_UP	1
ENSG00000168447	SCNN1B	activated	0.5053771046307135	0.11141975430686504	1.239077740538429	3.441081516749869	3.725678558153773	4.219811110021807	4.0710948647360254	FALSE	FALSE	chr16_23150000_23450000	TAD_UP	1
ENSG00000166828	SCNN1G	activated	-0.3925359239843582	1.2448269232773377	3.0381528807500593	4.115056163917444	3.9839211551740545	4.322482194245687	4.329192549197501	TRUE	FALSE	chr16_23150000_23450000	TAD_UP	1
ENSG00000103319	EEF2K	activated	0.05195289760801738	0.14093566784949138	0.6018118461213007	0.7394716429696407	0.7057216975621932	0.8682699274839528	0.7840483055043521	FALSE	FALSE	chr16_22200000_22300000	NA	NA
ENSG00000156968	MPV17L	activated	-0.01538071153881795	0.1889530856435758	0.23701402328140575	0.6823614865074102	0.8656175458687717	0.7411704575488861	1.0200208160231123	TRUE	FALSE	chr16_15350000_15650000	TAD_UP	1
ENSG00000103449	SALL1	activated	0.8705165446418872	0.8947026450523059	0.703583813380084	0.81391077679605806	1.5536398874882218	1.3806049148186583	1.690517064786617	FALSE	FALSE	chr16_50800000_52050000	TAD_UP	1
ENSG00000090565	RAB11FIP3	activated	0.01757609031894371	-0.11660601222988662	0.19962223720428757	0.5973097555284681	0.4656334122871878	0.8860637554447063	0.933780943265806	FALSE	FALSE	chr16_400000_550000	TAD_UP	1
ENSG00000103089	FA2H	activated	-0.02647306627512002	0.03021424057626059	0.31522077073618726	0.5973881641253964	0.7591065367957698	0.9738394540515816	0.7727021526187996	FALSE	FALSE	chr16_74650000_74900000	TAD_UP	1
ENSG00000103044	HAS3	activated	0.2198992307083253	0.2933910719996743	0.5892135779564737	0.8418073406550242	0.5309653798815162	1.1653206163299463	1.1375047075895268	FALSE	FALSE	chr16_68850000_69150000	TAD_UP	1
ENSG00000177508	IRX3	activated	0.43420736875676685	0.5292927553285636	1.1999451102993468	1.391666417072536	1.0567990287211664	1.374529532733735	1.120432171794454	FALSE	FALSE	chr16_53400000_56400000	TAD_UP	0.714285714285714
ENSG00000261008	LINC01572	activated	-0.14092797651386005	0.3929212575353651	0.7632920219193408	1.3524405262064907	1.2898595169613405	1.487313578424751	1.5927738699044287	TRUE	FALSE	chr16_72000000_74300000	TAD_UP	0.846153846153846
ENSG00000103196	CRISPLD2	activated	-9.071480929896156e-4	-0.0420108457759123	0.5506407021236064	1.1392904825336223	0.824462647135211	0.6309131739997879	0.9308861568066816	FALSE	FALSE	chr16_84750000_85000000	TAD_UP	1
ENSG00000168404	MLKL	activated	0.06841322791814422	0.08488462632458527	0.5466220831200727	0.6750429029133503	0.6692801121433961	0.857663340433603	0.8216443901587961	FALSE	FALSE	chr16_74650000_74900000	TAD_UP	1
ENSG00000104731	KLHDC4	activated	0.02554908854114153	0.03025460112603276	0.4018221344748139	0.5867428424582014	0.6751555106146133	0.8464559215627769	0.8141222914921298	TRUE	TRUE	chr16_87750000_87900000	TAD_BALANCED	0.5
ENSG00000196696	PDXDC2P-NPIPB14P	activated	0.08517963007703509	0.3382089120333367	0.11693935851425144	0.6598159578227363	0.7438355444559317	0.7960836898239166	0.9352752167771068	FALSE	FALSE	chr16_70050000_70150000	NA	NA
ENSG00000102996	MMP15	activated	0.1737089977437711	-0.01766826067585327	0.8389590752408621	1.4120544275104332	1.277900198287254	1.4004174323631369	1.3092956359622978	TRUE	FALSE	chr16_57550000_58150000	TAD_DOWN	0.3
ENSG00000278133	NA	activated	-0.06382690678881467	0.5521796070996072	0.4278889506612591	0.5306373192141346	0.6368058651388055	0.5131532760206212	0.85994534839419845	FALSE	FALSE	chr16_30950000_31500000	TAD_DOWN	0
ENSG00000125148	MT2A	activated	0.306993010792326	0.575378511886018	0.9806140214972004	1.8312552650047695	1.8959621906325488	2.3903496879108133	2.5684921117383186	TRUE	FALSE	chr16_56600000_56700000	TAD_UP	1
ENSG00000205362	MT1A	activated	0.01784248722924153	0.2625549071296744	0.21515341885716507	0.5324683824420234	0.5153148014842285	0.8875393160706975	0.9655091778184706	FALSE	FALSE	chr16_56600000_56700000	TAD_UP	1
ENSG00000198417	MT1F	activated	0.03095313486241619	0.3753601570455539	0.8514122719263736	1.0192518912893764	1.0325920175851566	1.975691408584792	1.9715213776670657	FALSE	FALSE	chr16_56600000_56700000	TAD_UP	1
ENSG00000184602	SNN	activated	0.21439899153463904	0.5945687301027451	1.2626288088065931	1.466682973301865	1.4636067905693184	1.3678958953348976	1.266380900803682	FALSE	FALSE	chr16_11350000_11850000	TAD_UP	1
ENSG00000279662	NA	activated	0.5542690558762371	0.9162075558253858	-1.1717379831983772	0.8491066722889935	2.037853706991827	2.3253744071615334	2.842204119082852	FALSE	FALSE	chr16_8550000_10950000	TAD_UP	1
ENSG00000087258	GNAO1	activated	0.24972042052860388	-0.16572343828074318	0.21781724538155664	1.0594984952502973	1.1563106979590765	1.886406061311051	1.377123046521347	FALSE	FALSE	chr16_53400000_56400000	TAD_UP	0.714285714285714
ENSG00000132613	MTSS2	activated	-0.03688304803641473	-0.07606389210948288	0.6981040824121582	1.2362045733968516	1.1170636043658937	1.151304930103754	1.1421723323361987	TRUE	FALSE	chr16_70650000_70800000	TAD_UP	1
ENSG00000015413	DPEP1	activated	0.3745048671133167	0.6395693506577885	1.6419294643081883	1.2419825372002964	1.349879961468368	1.3941321444293218	2.0365996796569066	FALSE	FALSE	chr16_89550000_89700000	TAD_UP	1
ENSG00000140939	NOL3	activated	0.171375294569731	0.10326750879063576	1.0756264597960188	1.2587405400193654	1.1362368565893282	1.1321560515015645	0.8593434770203418	TRUE	FALSE	chr16_66950000_67200000	TAD_UP	1
ENSG00000176387	HSD11B2	activated	0.31218277863958094	0.6484495719238805	1.6874251948310384	2.615842788794056	3.1257779974243407	3.2709610970002196	2.8819686005792016	FALSE	FALSE	chr16_67400000_67500000	NA	NA
ENSG00000276791	NA	activated	1.2486593533197516	1.311369883468871	1.726271290519961	1.2926429658520269	1.1051360362100202	1.891233656861032	1.3737624607773735	TRUE	FALSE	chr16_2750000_2850000	TAD_UP	1
ENSG00000121270	ABCC11	activated	0.34488431061162256	0.6640269109408196	0.7140667169225186	1.8107305432289431	1.074435131205324	0.473545176898327	1.4429909520144293	FALSE	FALSE	chr16_46800000_48650000	TAD_UP	1
ENSG00000213853	EMP2	activated	-0.00708580244598817	-0.00357754497063304	0.5861668312096725	1.0252447382146546	1.2436717525871146	1.5833956147397448	1.7393719943457138	FALSE	FALSE	chr16_8550000_10950000	TAD_UP	1
ENSG00000118898	PPL	activated	-0.03504339163989802	-0.303300272117985	0.9082448945136812	1.2755138711138547	1.3893522894366857	1.7349768384550623	1.5306866515583013	FALSE	FALSE	chr16_4700000_5000000	TAD_DOWN	0
ENSG00000166589	CDH16	activated	-0.3773781256493531	0.4853183364589283	2.315777261001223	4.004499769704843	4.398651072929105	4.472088832610356	4.639738064078635	TRUE	FALSE	chr16_66850000_66950000	TAD_UP	1
ENSG00000166592	RRAD	activated	1.0848713991573105	1.6989919780973242	4.083452801051052	5.21624798764326	5.288087668676125	5.399611799734918	5.277585193235706	FALSE	FALSE	chr16_66850000_66950000	TAD_UP	1
ENSG00000172824	CES4A	activated	0.1886038881438077	0.48088065752466735	0.7430417323044726	1.3262175874959052	1.7216321421132803	1.5240945926092198	1.7215138467771858	TRUE	FALSE	chr16_66950000_67200000	TAD_UP	1
ENSG00000185338	SOCS1	activated	1.5416015063480186	2.5050796461612244	4.34118884425323	4.615584932934054	3.782974054709915	3.8038010526014663	3.646458896043616	FALSE	FALSE	chr16_10950000_11350000	TAD_UP	1
ENSG00000132359	RAP1GAP2	activated	0.0748390977859749	0.06040061549081951	0.49751160255574567	0.8154492253463164	0.8008479386451661	0.7915775792362088	0.4813257884695452	FALSE	FALSE	chr17_2750000_3700000	TAD_UP	1
ENSG00000004660	CAMKK1	activated	0.1278941249180952	0.5762015890274457	1.2593105775449558	1.2512961061558912	1.209281830984661	1.0941353457485958	0.8994471237626338	TRUE	FALSE	chr17_3700000_4150000	TAD_UP	1
ENSG00000091622	PITPNM3	activated	0.03525383539193337	0.38740706188754714	0.01747170520169141	0.7935192768807673	0.9106351819539134	1.2412155938218623	1.1541591628952756	FALSE	FALSE	chr17_5050000_7050000	TAD_UP	1
ENSG00000214719	NA	activated	0.28959340913394405	-0.1033388050826014	1.210345819136634	0.5285655491733723	0.3178795373525368	0.4455898992298547	0.6302304073523411	FALSE	FALSE	chr17_30100000_30800000	TAD_BALANCED	0.666666666666667
ENSG00000176749	CDK5R1	activated	0.1292553677769199	0.6493172397989385	0.8818915211920315	0.9951548203044042	0.9170708116915438	0.5822522643030403	0.6888644202540916	FALSE	FALSE	chr17_32400000_36150000	TAD_UP	1
ENSG00000279806	NA	activated	0.102406679341425	0.10990275328680238	0.5645071182319016	0.995497330881326	1.2725529711233718	1.6131469803358518	1.5728015480100743	FALSE	FALSE	chr17_40400000_40600000	TAD_UP	1
ENSG00000131746	TNS4	activated	0.05751536624298409	0.15146930875933742	0.8550828104861888	1.1095536573724831	1.255106744006592	1.3973628622032572	1.354075835890776	TRUE	FALSE	chr17_40400000_40600000	TAD_UP	1
ENSG00000175906	ARL4D	activated	0.34233457288701163	0.8955441695498455	1.2826500986891474	0.8941996391040918	0.9805424946038974	0.9739013698622658	0.8117041921622156	TRUE	FALSE	chr17_43300000_43400000	NA	NA
ENSG00000186832	KRT16	activated	0.13305069300459715	1.1194425128837366	2.8290428545137822	2.0786888257969385	2.584582530210855	3.028490871644241	2.279217880616925	FALSE	FALSE	chr17_40600000_41700000	NA	NA
ENSG00000108465	CDK5RAP3	activated	-0.06604634419897909	0.21942440024566617	0.34482314018482624	0.70736990714416	0.8528647081473361	0.8114182949123664	1.092541682089165	TRUE	FALSE	chr17_47900000_48000000	TAD_UP	1
ENSG00000189120	SP6	activated	0.13905737029094736	0.7028607029398234	0.8885877022049817	1.520901627231801	1.2826059049676106	1.2010516775838438	1.288035526616253	FALSE	FALSE	chr17_47800000_47900000	TAD_DOWN	0
ENSG00000154217	PITPNC1	activated	0.0820543362093095	-0.3780933993023019	-0.04246669164793972	0.7474139299727637	1.09924874854204	1.3856148011048102	1.6223430007842867	FALSE	FALSE	chr17_67350000_67700000	TAD_UP	1
ENSG00000170921	TANC2	activated	0.1238795158325898	0.25734804413887397	0.2739388469063895	0.9297197526706864	0.9861122788454564	1.3682052988100557	1.2253854395610169	FALSE	FALSE	NA	NA	NA
ENSG00000069188	SDK2	activated	0.3837317011183766	-0.2247300614671837	0.2161735493157872	0.16145131745058092	1.0289720204131163	1.8760858766183153	1.9222017692875304	FALSE	FALSE	chr17_73400000_74200000	TAD_UP	1
ENSG00000141338	ABCA8	activated	-0.01022627875330923	-0.14735989668513536	0.39729980371033463	0.8063912852024011	0.7700331957180304	1.0639091719688518	1.2211954061002297	FALSE	FALSE	chr17_68050000_73400000	TAD_BALANCED	0.666666666666667
ENSG00000108924	HLF	activated	0.04573904228617948	0.3491774758536226	0.47943035731815864	-0.20678098228914335	-0.16492883872476985	0.45798712287052856	1.344863197168208	FALSE	FALSE	chr17_51300000_56800000	TAD_UP	0.909090909090909
ENSG00000171246	NPTX1	activated	0.4200966808263606	0.18377271882319016	0.3252873551454322	0.8182487248570327	0.2946411743857159	0.7932601597096939	0.6335479010832299	FALSE	FALSE	chr17_74700000_81700000	TAD_BALANCED	0.677966101694915
ENSG00000121075	TBX4	activated	1.3557759991904443	0.4914630612239474	0.8337389534960908	2.369151967072775	3.1271839243044752	2.884174078714292	1.985941321507746	FALSE	FALSE	chr17_61400000_61600000	TAD_UP	1
ENSG00000083290	ULK2	activated	-0.01639644214917697	0.11221781078922526	0.37266866884596395	0.6621400419612048	0.7230599420975019	0.8431697917222644	0.8331815109614321	FALSE	FALSE	chr17_19850000_19950000	TAD_UP	1
ENSG00000167711	SERPINF2	activated	-0.2122976773855201	-0.19743241310623091	0.02763711704017724	0.6769003054970075	0.6735019651425083	0.81824782359759	0.5379630402564133	FALSE	FALSE	chr17_1650000_1750000	TAD_DOWN	0
ENSG00000121104	FAM117A	activated	-0.06456882129209016	-0.14985070893904756	0.10908409338715222	0.9790503564209956	1.0184418006770906	1.1870239074982971	0.5278872392353724	FALSE	FALSE	chr17_49700000_49850000	TAD_UP	1
ENSG00000182575	NXPH3	activated	1.8679476507653143	2.2820056427503075	3.7402175947422385	4.198934883484668	4.626874813339847	5.035335094250988	4.1969128628215655	FALSE	FALSE	chr17_49550000_49700000	TAD_UP	1
ENSG00000108342	CSF3	activated	3.2377861509754657	5.852609731245264	5.500393778364528	6.8097693332714515	7.097353124576752	7.553843453274523	7.357136507241784	TRUE	FALSE	chr17_40000000_40200000	TAD_UP	1
ENSG00000126351	THRA	activated	0.00317392690703304	-0.10632455080466746	0.5710920330683166	0.7872349881318886	0.8091117992765097	0.9367358397964596	0.7588241587588064	FALSE	FALSE	chr17_40000000_40200000	TAD_UP	1
ENSG00000132518	GUCY2D	activated	2.2719501498161807	2.8550806026269577	3.29533864315552	3.5957423627189886	4.194068256656429	3.9114999062982503	4.026339881703464	FALSE	FALSE	chr17_7700000_8100000	TAD_BALANCED	0.333333333333333
ENSG00000179593	ALOX15B	activated	0	1.989658751824494	2.6839565142795214	5.805443271545294	6.383046242767365	6.487913764027401	7.390068536153509	TRUE	FALSE	chr17_7700000_8100000	TAD_BALANCED	0.333333333333333
ENSG00000179111	HES7	activated	1.100112493915963	0.5204065002849827	1.4909332222338385	1.8028191718444684	2.045376909152808	1.340869780431504	1.588006009047881	FALSE	FALSE	chr17_8100000_8250000	TAD_UP	1
ENSG00000125430	HS3ST3B1	activated	0.8830403311513888	1.4823734293871489	1.4836159775419189	1.964361151638094	2.3021314532562744	2.111681675405497	2.121397097900427	FALSE	FALSE	chr17_9600000_15600000	TAD_UP	0.875
ENSG00000266709	NA	activated	1.989273965123479	2.457025603443946	3.541317394390989	2.514571352406025	3.2961258112391905	3.7293030804957694	3.502063554882344	FALSE	FALSE	chr17_9600000_15600000	TAD_UP	0.875
ENSG00000287737	NA	activated	0.5085635881662426	0.9355833535619302	1.080062422425071	1.2881449651838035	1.3882147778171696	1.0207423482171605	1.179120294821682	TRUE	FALSE	chr17_82200000_82350000	TAD_UP	1
ENSG00000132470	ITGB4	activated	0.11144766486169186	-0.2989775118432312	0.7233216765923718	1.0535820083274798	1.2034372808562657	1.53728138674807	1.5297675146312384	TRUE	FALSE	chr17_74700000_81700000	TAD_BALANCED	0.677966101694915
ENSG00000185924	RTN4RL1	activated	0.1172325807764414	-0.3811291167889702	1.5776665276863184	2.52774167238369	2.395832945176233	2.4579977189007507	2.2216648371995364	FALSE	FALSE	chr17_1850000_2050000	TAD_BALANCED	0.5
ENSG00000159640	ACE	activated	0.214084672272555	0.1913604806803741	1.234634585370049	1.3325259167318335	1.6492020303017256	1.9207358691249248	1.9104969307838304	FALSE	FALSE	chr17_63400000_63650000	NA	NA
ENSG00000006025	OSBPL7	activated	0.11703466540763174	0.21010644822479885	0.6498542803905895	1.0129293421752832	1.0201441932875477	0.6251729519234391	0.8377208564437539	FALSE	FALSE	chr17_47800000_47900000	TAD_DOWN	0
ENSG00000141750	STAC2	activated	-2.4180207963401306	1.3344376301104146	3.604495815718557	5.4784853921094925	5.856678903511448	5.953776298647784	6.109484425529615	TRUE	FALSE	chr17_39150000_39250000	TAD_UP	1
ENSG00000185262	UBALD2	activated	0.20094835584285417	0.3683762045873441	0.8599437820440855	0.9675890346251702	1.0658972856048128	1.1831075375284894	1.0479533408076993	TRUE	FALSE	chr17_74700000_81700000	TAD_BALANCED	0.677966101694915
ENSG00000176845	METRNL	activated	0.22007741600222736	-0.2822961556505584	0.2241908744846782	1.0975719533593746	0.6002094850875054	0.6290786708779201	0.4462702909165444	FALSE	FALSE	chr17_82750000_83250000	NA	NA
ENSG00000167861	HID1	activated	-0.00878509750277993	0.3085134204037072	0.36327742985916006	0.9756519576329624	1.1627654931853653	0.9200273238926686	0.89336012847518	TRUE	FALSE	chr17_74700000_81700000	TAD_BALANCED	0.677966101694915
ENSG00000109089	CDR2L	activated	0.01705991402754933	0.08371553244836433	0.48340147613472056	0.740571934172884	0.6691233601035027	0.7551795766802951	0.6477738578380823	TRUE	FALSE	chr17_74700000_81700000	TAD_BALANCED	0.677966101694915
ENSG00000181885	CLDN7	activated	0.8430676915529408	0.8306077901393665	0.9246768730298732	2.4702582952389935	2.717860988012846	2.9919443266173373	3.213713594603756	TRUE	FALSE	chr17_7250000_7350000	TAD_UP	1
ENSG00000181856	SLC2A4	activated	-0.491640182406425	-0.12212805268126616	0.5171141577914182	1.7554243529085434	2.0129153395268755	2.155651986656011	2.1961678104988165	FALSE	FALSE	chr17_7250000_7350000	TAD_UP	1
ENSG00000264290	NA	activated	0.716219212972179	0.9018395922678076	1.827744280359529	1.4130745737901689	1.6714299411365712	0.4366723364554479	1.457182517936938	FALSE	FALSE	chr17_29550000_30100000	TAD_UP	1
ENSG00000173065	FAM222B	activated	0.02231705480691645	0.29458761975379805	0.8756923538157761	0.9303048641456396	1.164505774415971	1.1581103942597046	1.1299486621618453	FALSE	FALSE	chr17_28750000_28950000	TAD_BALANCED	0.5
ENSG00000108387	SEPTIN4	activated	0.31657515763497845	-0.05408207723314163	1.7806771694165302	1.7910374983903907	1.931192376989315	1.5797985249019169	1.6385169548929346	FALSE	FALSE	chr17_58500000_59050000	TAD_UP	1
ENSG00000175866	BAIAP2	activated	-0.08136735915939569	0.17265301775902356	1.1901977628659506	1.9353594629955544	1.769767181066518	1.751745220066134	1.7563857956340514	FALSE	FALSE	chr17_74700000_81700000	TAD_BALANCED	0.677966101694915
ENSG00000153822	KCNJ16	activated	-0.06055544026260236	0.21676460823912813	0.6657568289921525	1.18420332215383	1.435423176743328	1.3714640099619035	1.3029154677641297	FALSE	FALSE	chr17_68050000_73400000	TAD_BALANCED	0.666666666666667
ENSG00000141401	IMPA2	activated	-0.11590969093958751	-0.05495407296454427	0.41528499877422	0.690555253856627	0.6849311103568839	0.71807271343641	0.7591803535903497	TRUE	FALSE	chr18_11650000_12050000	TAD_UP	1
ENSG00000168234	TTC39C	activated	-0.00555057030159974	0.10686681839165252	0.7251636877238483	0.9143226615908172	1.0924499937578267	1.0486071950435192	1.010972789555896	FALSE	FALSE	chr18_23900000_24150000	TAD_UP	1
ENSG00000141622	RNF165	activated	0.11082806209820088	0.5991614878796523	1.2057083523269143	1.6445962409671868	1.2480109178072267	0.857676740433731	1.5158171099590405	FALSE	FALSE	chr18_46100000_46750000	NA	NA
ENSG00000134042	MRO	activated	0.07449470205913929	0.04847554519675728	0.3382325600388123	0.7243386080617579	0.18728337829189096	0.867928850872578	1.001125814257517	TRUE	FALSE	chr18_50800000_51050000	TAD_UP	1
ENSG00000166510	CCDC68	activated	0.04231431388102828	0.30870484817355104	0.24392833768910796	0.4917094913744729	0.5022139133480403	0.7113289670925922	0.7576435391686789	TRUE	FALSE	chr18_54350000_56700000	TAD_UP	1
ENSG00000141441	GAREM1	activated	-0.0368416058963106	0.03138253291605812	1.1618853810672989	1.195017886807259	1.19445515594021	1.1740898654217649	1.1553439658474371	FALSE	FALSE	chr18_32100000_32600000	TAD_UP	1
ENSG00000152229	PSTPIP2	activated	0.6739568907809153	0.31988128705271673	-0.0431579048834799	0.4123826202406164	0.6579719694675559	0.9265586160206034	1.3967748569231964	FALSE	FALSE	chr18_45650000_46100000	TAD_UP	1
ENSG00000184828	ZBTB7C	activated	0.15847897642311984	0.6006368057342408	1.0841152513532175	0.1722004598753592	2.0330602907080517	2.7435706797773967	2.5846286233510853	FALSE	FALSE	chr18_48000000_48450000	TAD_UP	1
ENSG00000081913	PHLPP1	activated	0.07396085873854541	0.12928987138541465	0.4097544808520091	0.6476290001577975	0.7904640979131662	0.7006303928212804	0.7318822022989132	TRUE	FALSE	chr18_62550000_63000000	TAD_UP	1
ENSG00000273368	NA	activated	0.25415204565668675	0.2356758766358964	1.1045137879749738	0.8497739828517789	0.3258219142482161	1.0335161789353855	1.303879961876776	TRUE	FALSE	chr18_7150000_8650000	TAD_UP	1
ENSG00000154065	ANKRD29	activated	0.094255932698668915	-0.10518647934085508	0.2974901201460275	0.5976901306069946	0.5157741227573329	0.5778676963340506	0.8129000286687423	FALSE	FALSE	chr18_23600000_23700000	TAD_UP	1
ENSG00000167220	HDHD2	activated	0.13614871686165983	-0.1401162193231497	1.024312891774547	0.3431961552637836	0.26515597437936056	0.2231282285006655	0.4197632691413496	FALSE	FALSE	chr18_47050000_47800000	NA	NA
ENSG00000141449	GREB1L	activated	-0.02037718550719736	0.2143121230492718	-0.04065475346016449	1.4796618086213558	1.7229037175734685	2.1073581679772597	2.135630250283012	FALSE	FALSE	chr18_21200000_21500000	TAD_UP	1
ENSG00000049759	NEDD4L	activated	0.00865586803247011	-0.0439031253865504	0.2838071089826212	0.3836662315758067	0.6156443159603466	0.7606672072607075	0.6021960683185678	TRUE	FALSE	chr18_57600000_58400000	TAD_UP	1
ENSG00000171451	DSEL	activated	0.01686316928643257	0.4420500689470419	0.4142893954167265	0.7654113752212827	0.9676558705482936	1.0673488740773902	1.014484977880294	FALSE	FALSE	NA	NA	NA
ENSG00000274414	NA	activated	1.2424222871618302	2.6687468844599853	3.1091289426690856	3.2221188706858945	3.680755925020805	3.5152111018917185	3.2109438519420173	TRUE	FALSE	chr20_25200000_25300000	TAD_UP	1
ENSG00000089195	TRMT6	activated	-0.04397698496574095	0.2576070868359019	0.3151514789189729	0.5238177053869013	0.5375172300215548	0.6930185708089545	0.7515555407875057	TRUE	FALSE	chr20_5500000_6100000	TAD_UP	1
ENSG00000088320	REM1	activated	-1.1353996473686303	-0.8160973091531522	3.040928540860373	5.143732109696875	4.929871803844718	4.305348031327692	5.036926844780833	TRUE	FALSE	chr20_31400000_31500000	TAD_UP	1
ENSG00000198959	TGM2	activated	0.09195699130483892	0.11574710882692794	0.19445006881391377	0.5314672132299807	0.472541916769434	0.8123600645718133	0.814438428402491	TRUE	FALSE	chr20_37150000_38450000	TAD_UP	0.785714285714286
ENSG00000158445	KCNB1	activated	-0.00666117582668605	-0.11607699995304256	1.482123403448817	3.3088877303767465	3.4165566096645685	4.144739689844273	4.216479931220732	TRUE	FALSE	chr20_49250000_49950000	TAD_UP	0.9
ENSG00000282870	FRG1DP	activated	0.29796547328952355	0.5339318361197124	0.3396323610828446	0.6837435084026656	0.4506281249708032	0.942935843741316	0.5552027672468132	FALSE	FALSE	NA	NA	NA
ENSG00000124126	PREX1	activated	0.12027600375494496	-0.1002606304224464	0.4603366906288245	0.7332765252321751	0.7750591544889112	0.7974423172029709	0.7696540965921644	FALSE	FALSE	chr20_46000000_49050000	TAD_UP	1
ENSG00000124216	SNAI1	activated	0.04783501522423958	0.6531918788658763	0.8340144580772683	0.2470622720019266	0.12707264719814004	0.11401319256741864	0.22351571640044685	TRUE	FALSE	chr20_49950000_50100000	TAD_UP	1
ENSG00000277938	NA	activated	1.024818181777925	1.2471250258754285	1.5693646472627505	2.0216570528056734	1.8300823493364151	1.775911475796773	1.7281229479332147	TRUE	FALSE	chr20_25200000_25300000	TAD_UP	1
ENSG00000100994	PYGB	activated	-0.01104218555890938	0.4146422804909872	1.2520707183646431	1.6061472450636909	1.5845234821418648	1.8030386244867125	1.7022607330253043	TRUE	FALSE	chr20_25200000_25300000	TAD_UP	1
ENSG00000197586	ENTPD6	activated	0.0040434581540773	0.02885766287513894	0.7810443154262857	1.0498020063080251	0.974093694546485	1.054281044912085	0.9329939328651728	FALSE	FALSE	chr20_25000000_25200000	NA	NA
ENSG00000132821	VSTM2L	activated	-0.02685289566943349	-0.01605706107532304	0.5383704554330319	1.1795287276087938	1.2356808526466714	1.7256767024719717	1.8235362961812809	TRUE	FALSE	chr20_37150000_38450000	TAD_UP	0.785714285714286
ENSG00000154930	ACSS1	activated	0.14508725946817988	0.24853816043720237	0.7244322069604772	1.037493563116818	1.0649841711070769	1.1605627139948294	0.9951295244292174	FALSE	FALSE	chr20_25000000_25200000	NA	NA
ENSG00000276603	NA	activated	-0.09663374307393538	0.4148481241408643	0.8086396272720103	0.582037206166216	0.6802225382615942	0.8545200191704743	1.1965943014109406	FALSE	FALSE	chr20_37150000_38450000	TAD_UP	0.785714285714286
ENSG00000124205	EDN3	activated	0.8730841834161719	1.7825781242567311	3.5375899891448244	4.138165169812194	4.79576317692373	4.994000313879969	5.230182948854182	TRUE	FALSE	chr20_57350000_59550000	TAD_UP	0.75
ENSG00000025293	PHF20	activated	0.0749583888723356	0.09341005784432868	0.3605578347276774	0.9603462461670564	0.9570117266967276	1.1378489862419117	1.1382255006305155	FALSE	FALSE	chr20_35650000_35950000	TAD_UP	1
ENSG00000149596	JPH2	activated	-0.16189227597371447	-0.00898587398851235	0.9405666997120998	1.896034496009974	2.135626994933211	2.404520986011503	2.3696546782790824	TRUE	FALSE	chr20_43450000_44200000	TAD_BALANCED	0.666666666666667
ENSG00000130589	HELZ2	activated	0.15732342640909883	-0.17881576011813072	1.1189091858370703	1.8778803210613144	1.712392099431472	1.9170167507324527	1.7474279425367143	TRUE	FALSE	chr20_63500000_64150000	TAD_BALANCED	0.5
ENSG00000132671	SSTR4	activated	0.8061943379212264	2.2328912089314854	4.562763639435042	4.73498355773861	4.685938738701977	5.1663229649466755	5.211315653288903	TRUE	FALSE	chr20_16850000_25000000	TAD_UP	0.961538461538462
ENSG00000277287	NA	activated	0.6239438622723881	0.44452674792507674	1.3528559307397037	1.3129084398487096	1.6161528134881256	1.531482909085596	1.3135963530349728	FALSE	FALSE	chr20_3050000_3350000	TAD_UP	1
ENSG00000171552	BCL2L1	activated	-0.16454804078295251	0.1623281368343432	0.27337813103516384	0.473409588320713	0.6460094352825559	0.7533308197258154	0.7482794532856082	TRUE	FALSE	chr20_31650000_31750000	TAD_UP	1
ENSG00000088836	SLC4A11	activated	-0.40575268975176615	0.0866348435144996	0.8330229740201884	1.09483857118276	1.447055010944445	1.4303927411416837	1.5134086422702364	FALSE	FALSE	chr20_3050000_3350000	TAD_UP	1
ENSG00000198900	TOP1	activated	0.05900302893275825	0.3161612669524788	0.7993546839268941	1.1751349229958594	1.0885400989009266	1.28502508046195	1.1104423604637788	FALSE	FALSE	chr20_39000000_43450000	TAD_UP	1
ENSG00000101333	PLCB4	activated	0.07472327561599057	0.1070948398520284	-0.17285076563914062	0.7039495136381003	0.7731457058421843	0.8203733953024664	0.9932148599527508	TRUE	FALSE	chr20_8750000_13800000	TAD_UP	0.862068965517241
ENSG00000124171	PARD6B	activated	0.16815854351296006	0.7714454962034591	0.966914751006429	0.9259517032939588	0.787601582340807	0.7980513604778768	0.8015245964787886	TRUE	FALSE	chr20_50100000_50800000	TAD_UP	0.9375
ENSG00000026559	KCNG1	activated	0.17409591911333194	0.0787494687317716	0.6725011386378439	1.2744430052293656	1.2401032524809597	1.1866321083534654	1.1791418345012494	FALSE	TRUE	chr20_50800000_52150000	TAD_UP	0.833333333333333
ENSG00000174306	ZHX3	activated	-0.05182042503472883	0.1749028997515593	0.10278603082968844	0.4762671221899406	0.6919145064643913	1.0042110876987569	1.0378856569950146	FALSE	FALSE	chr20_39000000_43450000	TAD_UP	1
ENSG00000088899	LZTS3	activated	-0.1607128021552875	-0.2511097668708653	0.30123080942025277	0.801053509378454	1.0130833328695026	1.11007878043411	1.211800402367655	FALSE	FALSE	chr20_3050000_3350000	TAD_UP	1
ENSG00000070404	FSTL3	activated	-0.01094911774080705	-0.0966377677994612	0.6267356514487719	0.92791487553464	0.7498174230778427	0.7801652518317368	0.784921653005752	FALSE	TRUE	chr19_650000_750000	TAD_DOWN	0
ENSG00000171970	ZNF57	activated	0.3389040104211567	0.8757106204396204	0.7915924477258147	0.7380486983321198	0.8455564322051867	0.5657691548651665	0.6374267487277607	FALSE	FALSE	NA	NA	NA
ENSG00000167468	GPX4	activated	-0.0799857074210253	0.18277429096962003	1.583771566705448	0.7107186933186418	0.4714193890598632	0.44088857758492794	0.4263827183991476	TRUE	TRUE	chr19_1000000_1250000	TAD_BALANCED	0.4
ENSG00000186204	CYP4F12	activated	-0.04332557017729392	0.29302701267399717	0.8214334412985783	1.0743899304908515	1.350420015839335	1.1860177126230134	1.3475234293996938	TRUE	FALSE	chr19_15600000_16050000	TAD_UP	1
ENSG00000105641	SLC5A5	activated	0.4566118946230367	0.43582651481387075	1.1360031042383347	1.4009013332440163	1.7427885592576131	0.9653522272997892	1.6396221658409469	FALSE	FALSE	NA	NA	NA
ENSG00000171954	CYP4F22	activated	2.311482010666236	1.605337679093909	3.042189330197681	4.047822784601964	3.4175387241175	3.702334844456674	5.050552409524608	FALSE	FALSE	chr19_15050000_15600000	TAD_UP	1
ENSG00000186529	CYP4F3	activated	-0.10333197904522626	0.37250903107404	0.7634832209549235	0.430909316224903	0.8374562849514148	0.8208918501403117	0.9677527107386033	TRUE	FALSE	chr19_15600000_16050000	TAD_UP	1
ENSG00000178150	ZNF114	activated	0.00293771513871589	0.8373508945262514	1.4539998918649424	1.954019998998924	1.7767478263310568	0.7673118449000976	0.8244667138598649	FALSE	FALSE	chr19_48250000_48650000	TAD_BALANCED	0.5
ENSG00000189114	BLOC1S3	activated	-0.00848682313327261	0.15247074335921496	0.7089090100421552	0.9661658181235152	1.0515610956291097	1.3086162106597357	1.201565706032219	TRUE	FALSE	chr19_45100000_45200000	TAD_UP	1
ENSG00000268460	NA	activated	0.1950082708553469	0.36929471747791304	1.1191638660147272	0.3514004946527043	1.2894343987476355	0.7849629456677977	0.2638421049535057	TRUE	FALSE	chr19_45900000_46600000	TAD_UP	1
ENSG00000134830	C5AR2	activated	0.6063503391497832	1.9288391620411696	3.3328620214606417	3.867970400998887	4.159188541874923	4.299988146620841	4.38320364677797	FALSE	FALSE	chr19_47250000_47400000	TAD_UP	1
ENSG00000170684	ZNF296	activated	-0.26650535685662574	-0.06282240308771894	1.1504671299362244	0.995545137413478	0.7196565903543699	0.8021683792961896	1.0000559172146428	FALSE	FALSE	chr19_45000000_45100000	NA	NA
ENSG00000086544	ITPKC	activated	0.18458899706367096	0.5080823839185376	1.3713795932289	1.3808575138365833	1.1624846831352016	1.100855943998983	1.072426043371107	TRUE	FALSE	NA	NA	NA
ENSG00000090924	PLEKHG2	activated	0.15041418883133928	-0.11210946654143523	0.4590625934177014	0.7748467068564644	0.7753382318110285	0.8122031616208176	0.7212476128659198	TRUE	FALSE	NA	NA	NA
ENSG00000125730	C3	activated	0.1281804976787649	-0.08517247089822642	0.3861037542086318	0.5837126627259468	0.5827949394386884	0.882836999301989	0.91826096452845	FALSE	FALSE	chr19_5900000_6950000	TAD_DOWN	0.25
ENSG00000276980	NA	activated	-0.6907356140152334	-1.3259070891657112	-0.6293228275389402	1.4924726623809237	1.2609708107595847	1.6547963730160895	1.8499393398596409	TRUE	FALSE	chr19_5900000_6950000	TAD_DOWN	0.25
ENSG00000161643	SIGLEC16	activated	1.6183053243446728	1.976649115335917	4.86268073071569	5.848722795538964	6.388100839817355	6.24004932302078	5.843694027525028	FALSE	FALSE	chr19_49950000_50100000	NA	NA
ENSG00000179846	NKPD1	activated	0.6573435234463219	0.5993849616798279	1.942484758988215	2.473628273953565	2.871203800513124	2.218515942170123	2.578006847457512	TRUE	FALSE	chr19_45100000_45200000	TAD_UP	1
ENSG00000161888	SPC24	activated	0.22380449720659276	0.5137412407352404	0.7807518454100353	0.6006637309260038	0.6396848965270617	0.7464215417824283	0.7286973535078723	TRUE	FALSE	chr19_11100000_11250000	TAD_UP	1
ENSG00000218891	ZNF579	activated	-0.03542061972569713	0.04110900700859717	0.5480023918452096	0.9009813846735548	0.6917550257478452	0.7762855579058222	0.4139452160330373	TRUE	FALSE	chr19_51000000_58550000	TAD_DOWN	0.3
ENSG00000104967	NOVA2	activated	0.2085903821166921	0.2989987054008108	0.4710925929672756	2.274180266396538	2.7201039809183403	2.9418850896150595	2.8134540705848803	FALSE	FALSE	chr19_45900000_46600000	TAD_UP	1
ENSG00000186994	KANK3	activated	0.8679057460344317	0.1610167699551303	0.7331110349119372	1.043107637013355	0.7441659908585506	1.1815760404301257	0.9292723124969886	TRUE	FALSE	chr19_8300000_8600000	TAD_UP	1
ENSG00000099860	GADD45B	activated	0.08303737973824213	0.05583899590755694	0.8196148813013417	0.844701297304215	0.5819845898887398	0.6209983210877302	0.5514228507014973	TRUE	FALSE	chr19_2450000_2650000	TAD_UP	1
ENSG00000269374	NA	activated	0.25894613517144005	0.944710753399309	0.7328102042942339	1.0039228980932782	1.030470091573659	0.7394314838409674	0.7144473459797048	TRUE	FALSE	NA	NA	NA
ENSG00000039987	BEST2	activated	0.7881290300504458	3.999738100536935	6.38470888473658	8.36237881087017	8.928657238954996	8.884612759095427	9.191348487371204	TRUE	FALSE	chr19_12650000_12950000	TAD_BALANCED	0.666666666666667
ENSG00000171223	JUNB	activated	0.05189723791935638	0.03649715593147856	0.8992265639692381	0.8712751369747131	0.710446778350237	0.7809621534115532	0.6621375538642196	TRUE	FALSE	chr19_12650000_12950000	TAD_BALANCED	0.666666666666667
ENSG00000074181	NOTCH3	activated	0.1679894862402414	-0.2446156332852007	0.7656472174864593	0.3758015363130932	0.6056833494746434	0.7396671389854839	0.46150992950042824	FALSE	FALSE	chr19_15050000_15600000	TAD_UP	1
ENSG00000123815	COQ8B	activated	0.00289763430669559	0.223470602483176	0.4320813747080097	0.5611692566994978	0.6736303382752729	0.7089127893291884	0.7557661438845704	TRUE	FALSE	NA	NA	NA
ENSG00000072071	ADGRL1	activated	0.04410231568201012	0.1186894676733882	0.6229808530665828	0.890054258175506	1.2948172943481764	1.7639910589000378	1.866471580117799	TRUE	FALSE	chr19_14100000_14500000	TAD_UP	1
ENSG00000105671	DDX49	activated	0.21268548767031312	-0.1853145006662324	1.1863243476330805	0.5206080483768316	0.23314551659493388	0.20828542309009695	0.17796293548206313	FALSE	FALSE	chr19_18450000_19000000	TAD_UP	0.75
ENSG00000180448	ARHGAP45	activated	0.01491668670449552	-0.11207302785295682	0.3244253432448065	1.3301423168593225	0.9817938747225357	1.33200649626706	1.180563491408721	FALSE	TRUE	chr19_1000000_1250000	TAD_BALANCED	0.4
ENSG00000105643	ARRDC2	activated	0.2273554846369181	0.4575150519176598	1.4165698090432064	1.6743756905083913	1.5054869373146802	1.599008934982061	1.4148275376607915	FALSE	FALSE	chr19_18000000_18100000	TAD_UP	1
ENSG00000133519	ZDHHC8P1	activated	0.03664129992647488	0.38269669292113506	1.0538835779287117	1.5674042003617703	1.5548414981181136	0.9792236700049374	1.202478428521726	TRUE	FALSE	chr22_23400000_23550000	TAD_UP	1
ENSG00000128335	APOL2	activated	0.1699633494868132	0.07595399173946339	1.245439591259295	1.5878509249197663	1.528977328169732	1.4857838377150798	1.5685122301958374	FALSE	FALSE	chr22_35300000_36300000	TAD_DOWN	0.25
ENSG00000128274	A4GALT	activated	0.08882723322348929	-0.07661010443246719	0.662116892423162	0.7782002783954222	0.8431295377285266	1.052695822693261	1.0534256702518825	FALSE	FALSE	chr22_42700000_42800000	TAD_UP	1
ENSG00000198355	PIM3	activated	0.0319078301324534	0.5358074569075362	1.7081878991789727	1.8262102211739952	1.6950798210672793	1.6328571044947853	1.506328150497077	TRUE	FALSE	chr22_49900000_50050000	TAD_UP	1
ENSG00000100290	BIK	activated	0.2002850461428361	0.5866782355471559	0.38228274283802294	0.06323378464032796	0.934652790766771	0.9974432344879448	1.316876491860474	FALSE	FALSE	chr22_43100000_43200000	NA	NA
ENSG00000100266	PACSIN2	activated	-0.03592492971376885	0.17728087862532385	0.864017778577065	1.23841753189173	1.3653568143462051	1.512112434248153	1.4799831063311897	TRUE	FALSE	chr22_43000000_43100000	TAD_UP	1
ENSG00000100342	APOL1	activated	0.31358502974963814	-0.02444996759516987	0.8435510891065049	0.9087901351518416	0.9491406457176688	0.7981565841402378	0.8768909628544809	TRUE	FALSE	chr22_35300000_36300000	TAD_DOWN	0.25
ENSG00000182057	OGFRP1	activated	0.2865319825308279	0.4103470147927212	0.9796373914896076	0.33884367009102623	0.2166942627935408	0.5255263749595509	0.5698325420714061	FALSE	FALSE	chr22_42050000_42500000	NA	NA
ENSG00000128268	MGAT3	activated	0.4366703407200041	-1.2181176858494642	0.3236909509461322	0.5756539869696008	0.08583476951878008	1.0417628324291193	0.6472427153172584	FALSE	FALSE	chr22_39400000_39500000	NA	NA
ENSG00000182902	SLC25A18	activated	-2.0308667682448585	1.4487661767844238	4.636006077324493	4.706482424180211	5.208945868105437	5.73419513261243	5.8328463369259085	TRUE	FALSE	chr22_17500000_17600000	TAD_UP	1
ENSG00000075240	GRAMD4	activated	0.0717035546054548	-0.03117983901583339	1.1188102882318498	1.621513725242562	1.962747758747835	1.8980311171755504	1.825246380741036	TRUE	FALSE	chr22_46550000_46700000	TAD_UP	1
ENSG00000183864	TOB2	activated	-0.0355281183243583	0.15039172013127733	0.5537457837552741	0.7137920862390209	0.7016027661895782	0.6627554801701193	0.757841747077291	TRUE	FALSE	chr22_41400000_41550000	TAD_UP	1
ENSG00000128298	BAIAP2L2	activated	0.26691397825575325	-0.24936736741130505	1.375883024824531	0.6931171672052701	0.7047406303367173	0.634555744370133	0.4475442477467985	FALSE	FALSE	chr22_38100000_38200000	TAD_UP	1
ENSG00000099998	GGT5	activated	0.40880931406365784	-0.462337346377066	1.1917802450287045	1.4872652634136316	1.5799576542702858	2.1074835463645036	2.159779335639743	TRUE	FALSE	chr22_24150000_24250000	TAD_UP	1
ENSG00000154639	CXADR	activated	0.05163143034707306	0.34019652125988714	0.6882813928032973	0.7054522959825604	0.7692277976931888	0.8550678370300783	0.9073859495171658	TRUE	FALSE	chr21_17350000_17650000	TAD_UP	1
ENSG00000275464	NA	activated	0.00146557847796731	-0.03406765765518099	0.7900165152294373	0.08816817375928607	-0.09032541007249452	0.12481292830825023	-0.03131426753525105	FALSE	FALSE	NA	NA	NA
ENSG00000280433	NA	activated	0.06905627067077655	1.1737659809043623	0.2620880944211464	1.21939337866565	0.6460286174868594	0.5684802621525038	1.1520808087645005	FALSE	FALSE	NA	NA	NA
ENSG00000157542	KCNJ6	activated	0.48208832433836113	0.29932143889840535	0.5915495358210766	0.7008547216090479	0.712421077460598	1.5775337835624907	1.156679274621114	FALSE	FALSE	chr21_37650000_38400000	TAD_UP	0.888888888888889
ENSG00000286153	NA	activated	0.30604434928278373	0.1479537077749175	0.5686689298656884	1.7308370550789485	2.38483407438589	3.094134034367464	2.7852547319457277	TRUE	FALSE	chr21_34600000_36100000	TAD_UP	1
ENSG00000183421	RIPK4	activated	0.24732541858737225	0.7259984433047428	1.1074716582367718	1.0106790533855607	0.7914015327661793	0.7597812845702461	0.6968280728520834	TRUE	FALSE	chr21_41600000_41800000	TAD_UP	1
ENSG00000267519	MIR23AHG	repressed	-1.5994217061050338	-1.9857623522166776	-0.9561354418711796	-0.9646186053432072	-0.6687612378961207	-0.6565878935325399	-0.6984526035742157	FALSE	TRUE	chr19_13750000_13850000	TAD_DOWN	0
ENSG00000160888	IER2	repressed	-0.6410262353529737	-1.9232847469598249	-1.597075237410306	-1.3486046514554215	-1.5897262762809927	-1.1368333565167803	-1.110686798217598	FALSE	TRUE	chr19_13150000_13250000	TAD_DOWN	0
ENSG00000134107	BHLHE40	repressed	-0.5039833320218426	-1.3800405296089566	-1.1229304977993464	-1.029765214678311	-0.6400423892919114	-0.5404852837316187	-0.49431222894270466	FALSE	TRUE	chr3_4650000_5200000	TAD_DOWN	0.166666666666667
ENSG00000137331	IER3	repressed	-1.014583660404493	-1.6591503725352317	-1.9651601366159424	-2.0403228612000164	-2.1024933117099596	-2.05889946798557	-2.082004833535377	FALSE	TRUE	chr6_30700000_30900000	TAD_DOWN	0.166666666666667
ENSG00000145632	PLK2	repressed	-0.6136047185559202	-1.551028613615767	-2.370520253515488	-1.9394223964486772	-1.9104471429721837	-1.813137101224256	-1.5660777413563869	TRUE	TRUE	chr5_57250000_58850000	TAD_BALANCED	0.5
ENSG00000078401	EDN1	repressed	-0.33829177225950935	-0.506443020926426	-0.7522419718193436	-0.6938532371265631	-0.8419583704231257	-0.7551521933235409	-0.965367004300456	TRUE	TRUE	chr6_11550000_13600000	TAD_UP	0.818181818181818
ENSG00000163545	NUAK2	repressed	-0.4037156544527934	-1.1970333438957388	-0.690147093592772	-0.4213581667682176	-0.3679776403537177	-0.16256451111606754	-0.22118181003099951	FALSE	TRUE	chr1_204800000_205550000	TAD_DOWN	0.25
ENSG00000114315	HES1	repressed	-0.6966901737454473	-1.6024894482849552	-1.049659448872743	-1.4108768216109893	-1.410723672027837	-1.035048533397028	-1.021595120498628	TRUE	TRUE	chr3_193650000_194400000	TAD_BALANCED	0.5
ENSG00000164949	GEM	repressed	-0.5360422717558238	-0.9778197843093104	-1.969099300354206	-1.4669581562584533	-1.4638969048511397	-1.0370772308768803	-1.1361156122175922	FALSE	FALSE	chr8_93700000_94550000	TAD_UP	1
ENSG00000162783	IER5	repressed	-0.5155279963639975	-0.7628423910911983	-1.0337572040121712	-1.0472641261035365	-0.9859137970484084	-1.0635995601516552	-0.9030866326475104	FALSE	TRUE	chr1_180500000_181200000	TAD_BALANCED	0.666666666666667
ENSG00000162591	MEGF6	repressed	0.08188872117542537	-0.45683297526004657	-0.19397691643221177	-0.13115244836902726	-0.586169875704966	-0.8062151241712445	-1.0509476175608123	FALSE	FALSE	chr1_3450000_3650000	NA	NA
ENSG00000229344	MTCO2P12	repressed	-0.3670391389098319	-0.7799199526989171	-0.5829171939897831	-0.3815264239778559	-0.3751748832571404	-0.5567617143291377	-0.4224148299601878	FALSE	FALSE	NA	NA	NA
ENSG00000162496	DHRS3	repressed	0.05728119333961867	-0.5412491564097549	-0.5406365540079978	-0.9010972338520862	-0.761229839454535	-0.8435237829851967	-0.8008973923445512	FALSE	FALSE	chr1_12250000_12700000	TAD_UP	1
ENSG00000169403	PTAFR	repressed	-0.48201893114101807	-0.7537482365660492	-0.8376367470672604	-2.0710004409994776	-1.458665179135206	-2.2287747070665715	-1.9298565201543596	FALSE	FALSE	chr1_28100000_28200000	NA	NA
ENSG00000142627	EPHA2	repressed	-0.34240354728854233	-0.612680122091028	-1.2140293392188362	-0.6464874942849851	-0.3744113596562448	-0.3661532997133421	-0.3731579972254723	FALSE	TRUE	chr1_16000000_16250000	TAD_BALANCED	0.666666666666667
ENSG00000175147	TMEM51-AS1	repressed	0.09056293611972666	-0.15769773755224362	0.1745354142059052	-0.8018016685563251	-1.3990429835869935	-0.8556313317348236	-1.256461066086516	FALSE	FALSE	chr1_15150000_15300000	TAD_DOWN	0
ENSG00000169991	IFFO2	repressed	-0.06289464701478788	-0.5334449290634719	-1.5292655317759445	-2.162113787107526	-2.06050959964761	-2.0814806064313247	-1.804560604692776	FALSE	TRUE	chr1_18900000_19100000	TAD_DOWN	0
ENSG00000215895	HSPA5P1	repressed	-0.404722376944276	-1.4179581756285775	-1.4824720930272366	-1.0593262321706485	-1.109852201666847	-0.2757016046499345	-0.40034211525623614	FALSE	FALSE	chr1_38000000_38850000	NA	NA
ENSG00000177181	RIMKLA	repressed	0.21472066127829015	-0.3573726439013504	-0.341167477663386	-0.6002081593916563	-0.44670979618743273	-0.8497125331649343	-0.9971151235602478	FALSE	FALSE	chr1_41450000_42800000	TAD_UP	0.857142857142857
ENSG00000162407	PLPP3	repressed	-0.04051580646354712	-0.05895300538694484	-0.6197722983163416	-0.8749991421656328	-0.9482728504546256	-0.7535204395886594	-0.5285337124349307	TRUE	TRUE	chr1_55050000_56800000	TAD_UP	0.75
ENSG00000184588	PDE4B	repressed	-0.05613645182077938	-0.4718967227313305	-0.802791021117536	-1.2429143772344795	-1.0707905821091237	-0.8784785187175894	-0.7879163583732434	FALSE	FALSE	NA	NA	NA
ENSG00000134215	VAV3	repressed	-0.17551023633932794	-0.00508551967926398	-0.8386135803685114	-1.7218722570422595	-1.3544665125868462	-1.7660936779885057	-1.4185719042416105	FALSE	FALSE	chr1_107750000_108150000	NA	NA
ENSG00000116299	ELAPOR1	repressed	0.2703997509980461	-0.07324706054738961	0.1815891920658976	-0.3809094618271543	-0.19521905287755872	-0.3928532973213259	-0.8543615525533411	FALSE	FALSE	chr1_109100000_109200000	TAD_DOWN	0
ENSG00000023909	GCLM	repressed	-0.05200153567128943	0.33352153348109487	-0.21987397277380116	-0.6452384169081696	-0.6446148303605782	-0.8468596052094385	-0.7879787071239895	FALSE	TRUE	chr1_93900000_94000000	TAD_DOWN	0
ENSG00000099260	PALMD	repressed	0.0112879946085857	-0.04290196507445056	-0.35453589176333056	-0.969762911891874	-1.0763600841462078	-0.9904922478800596	-0.6081745780418006	FALSE	FALSE	chr1_99450000_99750000	NA	NA
ENSG00000225206	MIR137HG	repressed	-0.13377106804471642	-0.4003600951043951	-1.2406206867553815	-0.6947606073868567	-0.6374147535819704	-0.8315262217884196	-0.483167005401297	FALSE	FALSE	NA	NA	NA
ENSG00000134253	TRIM45	repressed	0.22244993089094353	-0.3377306120783783	-0.2890285540167659	-0.3564842775700795	-0.5454165167588599	-0.8164423438069557	-0.6924585975822098	FALSE	FALSE	chr1_117100000_117300000	NA	NA
ENSG00000237975	FLG-AS1	repressed	-0.06508458723736411	-0.403089546870468	-0.3385439538940907	-0.6175227090877581	-0.3971740952590122	-0.6490328461787871	-0.791415841582459	TRUE	FALSE	chr1_152050000_153500000	TAD_UP	1
ENSG00000285184	NA	repressed	-0.13486120671612417	0.01561431256505401	-0.9058414761107868	-0.7348912860618254	-0.5399248691079696	-0.4302046579487168	-0.6198694046966846	FALSE	FALSE	chr1_149850000_150200000	NA	NA
ENSG00000162738	VANGL2	repressed	-0.18340892638318823	-0.2219942563473604	-0.2893051945000601	-0.5243921959434286	-0.6148406462496654	-0.8338526327518806	-0.9246931092550118	FALSE	FALSE	chr1_160400000_160650000	NA	NA
ENSG00000184371	CSF1	repressed	-0.31413523674709404	-0.3932850318157777	-1.168654371241867	-1.1514215489159818	-1.0766351864655614	-1.2607459770975329	-1.0077032991051382	TRUE	TRUE	chr1_109750000_110000000	TAD_BALANCED	0.333333333333333
ENSG00000121454	LHX4	repressed	0.13016127793329518	-0.4947420949545772	-0.5434750858113316	-0.12046128081376642	-0.4682296357819472	-0.699400075067646	-1.2438184839978277	FALSE	FALSE	chr1_180200000_180500000	NA	NA
ENSG00000000971	CFH	repressed	0.03600104235709331	0.01299470799868657	-0.14768202593075894	-0.8891722434230974	-0.1015612054921943	-0.25442810767231644	-0.33353905190027955	FALSE	FALSE	NA	NA	NA
ENSG00000162409	PRKAA2	repressed	-0.04856952431765654	0.0109808922811254	-0.7042418153962748	-0.8223230883069359	-0.8015927417753315	-0.8794659092347493	-0.7882311080389184	TRUE	TRUE	chr1_55050000_56800000	TAD_UP	0.75
ENSG00000116833	NR5A2	repressed	-0.01179577013819352	0.0529516283618413	-0.9738196861085744	-1.4415039331567323	-1.3554572097307158	-1.3894177200512905	-1.2483353883903698	TRUE	FALSE	chr1_199550000_200600000	TAD_UP	1
ENSG00000143507	DUSP10	repressed	-0.00701000133070297	-0.09763286160718068	-0.7427111474568103	-0.9514459915468664	-1.0057326283189332	-1.1051327404864204	-1.0832215667899854	FALSE	FALSE	chr1_220150000_222700000	TAD_UP	1
ENSG00000143367	TUFT1	repressed	-0.11425574987457124	-0.26100390103129756	-1.1192499337664887	-1.0552579646776952	-0.8956543441494881	-1.0414098281845263	-0.8579050081450456	FALSE	TRUE	chr1_151400000_151900000	TAD_BALANCED	0.5
ENSG00000197959	DNM3	repressed	-0.3791303097047961	0.09693225114340448	-0.6033362024509564	-1.0534434661003398	-0.25953882344963886	-0.8170304757181667	-1.0052649136282898	FALSE	FALSE	chr1_171750000_172000000	TAD_UP	1
ENSG00000215808	LINC01139	repressed	-0.48045133623999253	-0.11506835580855676	-2.466922885626226	-0.4856975798833272	-0.31526681505078374	-0.93499659916096	-0.5545036121607536	FALSE	FALSE	chr1_236600000_241500000	TAD_UP	1
ENSG00000163435	ELF3	repressed	-0.20792498931078007	-0.954987776787578	-1.1066451247826183	-1.2611434280057991	-0.9186328497839684	-0.932695476846212	-0.7969992854295418	FALSE	TRUE	chr1_202000000_202150000	TAD_DOWN	0
ENSG00000158715	SLC45A3	repressed	0.02491306524776806	-0.16012643454780773	-0.5961484520344693	-0.6975007351877626	-0.5736789325444951	-0.49700986519112966	-0.8744917320197241	FALSE	TRUE	chr1_205650000_205750000	TAD_DOWN	0
ENSG00000026751	SLAMF7	repressed	-0.6651539820378579	-0.34384286261761865	-1.0792011864841882	-0.13862905409854673	-0.22741972651715525	-1.2417366171801496	-1.2910888840192751	FALSE	FALSE	chr1_160650000_161150000	TAD_UP	1
ENSG00000092969	TGFB2	repressed	0.00423697846833048	0.01067782297590182	-0.6486450449641967	-1.5736104278310576	-1.7596814776068446	-2.0665662818105757	-1.9563307748316672	TRUE	TRUE	chr1_218250000_219850000	TAD_BALANCED	0.636363636363636
ENSG00000143153	ATP1B1	repressed	-0.18321373167450203	0.03173440413318389	-0.32281446678265424	-0.6468222832702808	-0.516532910239017	-0.8729871804111506	-0.8083131293734604	TRUE	TRUE	chr1_168250000_169550000	TAD_UP	0.9
ENSG00000282849	NA	repressed	0.01293955952810732	0.00730633805620483	-0.06792868294392655	-0.6684811228872479	-0.5234919341385238	-1.178719405670427	-1.376401224068084	TRUE	FALSE	chr1_199550000_200600000	TAD_UP	1
ENSG00000162772	ATF3	repressed	0.5619034068579631	0.4859443896796308	-0.0935795925189291	-0.4766903804127677	-0.3327003845365555	-0.5946689858022907	-0.891610629776564	FALSE	FALSE	chr1_212450000_213050000	TAD_BALANCED	0.5
ENSG00000135828	RNASEL	repressed	0.04159264525829903	-0.4191257236584968	-0.49255647932289254	-0.8580748534614587	-0.31095317062949324	-0.4204841154455132	-0.3711140356090973	FALSE	FALSE	chr1_181200000_182850000	TAD_UP	1
ENSG00000133069	TMCC2	repressed	-0.14898377904179713	-0.40899442845087025	-1.271204847609992	-1.1250435536950554	-1.5522265639360535	-1.604254030638738	-1.2640043020674432	FALSE	FALSE	chr1_204800000_205550000	TAD_DOWN	0.25
ENSG00000234678	ELF3-AS1	repressed	-0.3535898456405948	-0.7905267420209131	-0.7289611550144498	-1.1567167881725382	-1.2112934708309424	-1.4347004693926817	-1.5526536879199413	FALSE	TRUE	chr1_202000000_202150000	TAD_DOWN	0
ENSG00000143473	KCNH1	repressed	-0.02426365803363045	0.41497652946594865	0.5175283784730906	-0.29117396466793616	-0.4161881035469719	-0.6706695992737618	-0.9308592441627817	TRUE	TRUE	chr1_210350000_211300000	TAD_BALANCED	0.666666666666667
ENSG00000228063	LYPLAL1-DT	repressed	-0.2697671221766981	-0.4057106120591744	-0.7818791819822205	-1.1313880097423896	-2.315447535274994	-2.1066239962434223	-2.2867906989967373	FALSE	TRUE	chr1_218250000_219850000	TAD_BALANCED	0.636363636363636
ENSG00000082497	SERTAD4	repressed	0.0998555912977752	-0.02968166340116063	-1.6998049117634195	-0.5603089296051997	-1.5104241843301616	-0.8997089490778886	-1.6183246597829029	FALSE	FALSE	chr1_210100000_210350000	NA	NA
ENSG00000183114	FAM43B	repressed	-0.46556723605700906	-0.9311525491661626	-1.071901442072919	-1.41697045745399	-1.1838679784131805	-1.726180905427696	-1.5474528559414311	FALSE	FALSE	chr1_20500000_20650000	NA	NA
ENSG00000116761	CTH	repressed	-0.1713920318520208	-0.03870709560657543	-0.6652128845746291	-1.0759673642389551	-0.5535540787096677	-0.6676429678038935	-0.6936222203923172	FALSE	FALSE	chr1_70200000_70500000	NA	NA
ENSG00000134668	SPOCD1	repressed	-0.17604560469065797	-0.5251740963636399	-1.0028919105631438	-0.25639756112816997	-1.076984848033059	-1.328521300765387	-1.5624812738783769	FALSE	FALSE	chr1_31800000_32000000	TAD_BALANCED	0.5
ENSG00000169242	EFNA1	repressed	-0.23551197899285076	-0.701161896630368	-0.8764747140943095	-0.8413742560608574	-0.5897270499500642	-0.40582911804364946	-0.34433446233392284	FALSE	TRUE	chr1_155050000_155150000	TAD_DOWN	0
ENSG00000116701	NCF2	repressed	-0.14619084628171203	0.04192562510264807	-0.6410425918106913	0.0965080789583354	-0.5743419398624693	-0.5893745909495166	-1.1721534522407555	FALSE	FALSE	chr1_182850000_183650000	TAD_UP	1
ENSG00000142623	PADI1	repressed	-0.24285461974932185	-0.15741555880135585	-0.28215820516841317	-1.2068543953056408	-0.9860030540155814	-1.838481044254167	-1.427509267623653	FALSE	FALSE	chr1_17050000_17450000	TAD_DOWN	0
ENSG00000134207	SYT6	repressed	0.11159575382222756	0.0600955223039091	-0.3180019377444698	0.22794715223941164	-0.604133505716079	-1.0166525470122916	-1.9918885378520133	FALSE	FALSE	chr1_113950000_114300000	NA	NA
ENSG00000198758	EPS8L3	repressed	0.1685669505986469	-0.3084403522097393	-0.15137027073718878	-1.6255014889278532	-0.6559864385475832	-0.7907237245101422	-2.06815522765181	FALSE	TRUE	chr1_109750000_110000000	TAD_BALANCED	0.333333333333333
ENSG00000225518	LINC01703	repressed	-0.288399546390577	-0.26570294996411287	0.05470824033310225	0.2674301869951765	-1.4198320753222553	-1.2370547076688148	-1.5453215885421148	FALSE	FALSE	chr1_226000000_226100000	NA	NA
ENSG00000229991	AKR1B1P1	repressed	-0.15200812681377587	-0.35687755960617634	-2.740658384573827	-1.4672223533887057	-0.9042827694452956	-1.4550328883506745	-0.8965812846428252	FALSE	FALSE	chr1_224450000_225400000	NA	NA
ENSG00000162913	OBSCN-AS1	repressed	0.10048244815401784	-0.6405798472031254	-0.7421203444880548	-0.7875386312135565	-0.7705925918895354	-0.5913313217444746	-1.0393701447969017	FALSE	FALSE	chr1_226300000_228550000	TAD_BALANCED	0.6
ENSG00000177606	JUN	repressed	-0.3822001979105934	-1.5003888905544909	-1.094270656508029	-0.586433455914852	-1.0478527572260423	-0.6597828183143519	-0.7848509643571027	FALSE	TRUE	chr1_58650000_59800000	TAD_DOWN	0
ENSG00000225616	NA	repressed	-0.4011723731192803	-0.8467207750615248	-1.79605158188595	-0.5697093494399844	-0.4610833670098305	-0.4123437535912036	-0.5099304788870511	FALSE	FALSE	chr1_28750000_29200000	NA	NA
ENSG00000163565	IFI16	repressed	-0.142520806810714	-0.8742040357125203	-0.27227775223387335	0.17063730050830986	-0.3845282475942779	-0.4737648752967364	-0.4264874053045647	FALSE	FALSE	chr1_157150000_159100000	TAD_BALANCED	0.5
ENSG00000142920	AZIN2	repressed	-0.3774944962585174	-0.5551310227637826	-0.7113309720170687	-1.3317059801777136	-0.5760478001557173	-1.6925221346885289	-1.5105730680132392	FALSE	FALSE	chr1_32850000_33100000	NA	NA
ENSG00000162645	GBP2	repressed	-0.2112579980275062	-0.10102458315833522	-0.948811625484094	-0.7391150852838563	-0.4445745282374127	-0.9162176300372676	-1.3400561286199768	FALSE	FALSE	chr1_88950000_89450000	NA	NA
ENSG00000073756	PTGS2	repressed	-0.2910153890682952	-0.6706857785084467	-1.774561303693146	-1.752920423789379	-1.138335816209954	-1.1856575131419949	-0.99138971569925	FALSE	FALSE	chr1_186400000_187000000	TAD_UP	1
ENSG00000273129	PACERR	repressed	-0.8153812499814972	-1.0226990965410017	-2.7448691475016567	-3.3727173640696724	-0.9619586457995398	-0.9042879744509884	-0.919335169048648	FALSE	FALSE	chr1_186400000_187000000	TAD_UP	1
ENSG00000223764	LINC02593	repressed	0.1025599498152356	-0.11295015151725687	-0.3071227048159938	-0.662460510112827	-0.5742867664923973	-1.0569839777509922	-0.6243849399647482	FALSE	FALSE	chr1_900000_1000000	NA	NA
ENSG00000187583	PLEKHN1	repressed	-0.05816059809402767	-0.2627667044582612	-0.18359088141979787	-0.6198445030614812	-0.3367216250359546	-0.8563742528290329	-0.46503009326729944	FALSE	FALSE	chr1_900000_1000000	NA	NA
ENSG00000188290	HES4	repressed	0.11566935903006076	-0.29680816843352953	-0.6355077224213413	-0.812435686386561	-1.1180273617133347	-0.7640740386405201	-0.6029409305037213	FALSE	FALSE	chr1_1000000_1100000	TAD_DOWN	0
ENSG00000157216	SSBP3	repressed	0.2014310562088389	-0.27778364093312663	-0.0357708511058487	-0.4773012088850466	-0.783154258122114	-0.8228279240358422	-0.8709074771107822	FALSE	FALSE	chr1_53250000_55050000	TAD_UP	1
ENSG00000272405	NA	repressed	0.06622316800302475	-0.11289063896508553	-0.02116580301816861	-0.6148791586865976	-0.8813374614012013	-0.6968809836738203	-0.7332043762124882	FALSE	FALSE	chr1_156600000_156700000	TAD_UP	1
ENSG00000187634	SAMD11	repressed	0.09023830092027166	-0.6519918639389595	-0.482313390110141	-0.7961829455848732	-0.9659780352273826	-0.8002333420305188	-0.7806708424153264	FALSE	FALSE	chr1_900000_1000000	NA	NA
ENSG00000162620	LRRIQ3	repressed	-0.330455258324336	-0.23751197766167004	-0.5653023111044018	-0.5023786834445415	-0.4376797784031084	-0.7902918278427343	-0.4471594211891594	FALSE	FALSE	NA	NA	NA
ENSG00000154358	OBSCN	repressed	0.06167894213924472	-0.46016970987929096	-0.18278178126086897	-0.72833879960008	-0.5200713089093372	-0.43215000245119733	-0.8074665228901744	FALSE	FALSE	chr1_226300000_228550000	TAD_BALANCED	0.6
ENSG00000180875	GREM2	repressed	0.13213543759295052	0.28652834152611906	-0.6290396692083475	-1.5118919854177464	-2.3224310474197196	-2.2714148320280785	-2.4267331188724857	FALSE	FALSE	chr1_236600000_241500000	TAD_UP	1
ENSG00000168264	IRF2BP2	repressed	0.08648630000845602	-0.11062985382616676	-0.5780410959710498	-0.7586772585935777	-0.6701101687070168	-0.3576224257424885	-0.41568389166444414	TRUE	TRUE	chr1_234450000_235150000	TAD_UP	0.714285714285714
ENSG00000179023	KLHDC7A	repressed	0.01644566498929132	-0.4663403574214947	-0.3727085760793606	-0.8686237186105591	-0.4408160527130971	-0.7232527524517236	-0.6962272696595687	FALSE	FALSE	chr1_17450000_18900000	TAD_UP	1
ENSG00000221539	SNORD99	repressed	-1.2517640922343682	-3.0034910924619735	-2.8880936841749607	-2.5072068741980575	-1.055236024271076	-0.524160653740031	-0.2722288725027524	FALSE	FALSE	chr1_28500000_28650000	NA	NA
ENSG00000143412	ANXA9	repressed	-0.4185967155110053	-0.38844723798684944	-0.3824885742105046	-0.7517033967882586	-0.6531570036179462	-0.35295856196970476	-1.0139446164795298	FALSE	FALSE	chr1_150850000_151000000	NA	NA
ENSG00000152763	DNAI4	repressed	-0.04457505379110892	-0.5039014761596988	-0.8163548126294242	-0.5791074246761404	-0.14509382580336863	-1.0960291787007637	-0.6727317530265041	FALSE	FALSE	NA	NA	NA
ENSG00000162624	LHX8	repressed	-0.24429812860574496	-0.13540991643406464	-0.7199576847459236	-0.7660359407653133	-1.1070246638695236	-1.2225005784050456	-0.868510574875294	FALSE	FALSE	chr1_75100000_75200000	NA	NA
ENSG00000076864	RAP1GAP	repressed	0.0129022624595743	-0.34245160172879924	-0.03216785203787183	-0.4520531229870522	-0.48089598679364703	-0.5384515822895737	-1.2888090516686488	FALSE	FALSE	chr1_21200000_21700000	TAD_UP	1
ENSG00000127603	MACF1	repressed	0.0967367771963304	0.06164343025621179	-0.13710216297913885	-0.7232427832470842	-0.6678687282162776	-0.6971933731788237	-0.9078208495592954	FALSE	FALSE	chr1_39050000_39800000	TAD_DOWN	0
ENSG00000266094	RASSF5	repressed	-0.14713484115903502	-0.2609796325376963	-0.3615099131561406	-0.808272877319443	-0.6382695557383223	-0.6525329777066019	-0.8976096052222851	FALSE	FALSE	chr1_206500000_206600000	NA	NA
ENSG00000187800	PEAR1	repressed	-0.1162889112732493	-0.11952294187441036	-0.19765876349447217	-0.6063570765842877	-0.5308539102921896	-1.076575881778138	-0.8167873202158292	FALSE	FALSE	chr1_156800000_156950000	NA	NA
ENSG00000115738	ID2	repressed	0.12300976940429466	0.04037631510602586	-0.5727262822746803	-0.3876557449568671	-0.8364606606109009	-0.6541164283292649	-0.526259547168741	FALSE	FALSE	chr2_7050000_9150000	TAD_BALANCED	0.666666666666667
ENSG00000188765	TMSB4XP2	repressed	-0.5151539425395807	-1.1470389895680349	-1.5666887720398857	-1.2265703468177094	-1.3557728240657363	-0.7326280448564065	-1.046838004960922	FALSE	FALSE	chr2_0_7050000	TAD_UP	1
ENSG00000171303	KCNK3	repressed	-0.22579939558960477	-0.8115924968419334	-0.8160833151013084	-1.6652664920588898	-1.4400321028445642	-1.9788883470899852	-2.295015898506202	FALSE	FALSE	chr2_26600000_26750000	TAD_DOWN	0
ENSG00000084764	MAPRE3	repressed	-0.15673434900702224	-0.2953693081935618	-0.12276322145979732	-0.30093525113092295	-0.46533337504407674	-0.8800562490199122	-0.8042154439560801	FALSE	FALSE	chr2_26950000_27050000	NA	NA
ENSG00000213772	EIF1P7	repressed	-0.6220567462606048	-1.165356375252944	-1.4764853234145028	-1.0042162541922799	-0.9346877749325696	-1.0136842715465797	-0.4030632774040703	FALSE	FALSE	chr2_9150000_9450000	NA	NA
ENSG00000084710	EFR3B	repressed	-0.16094200992997318	0.06959909446858585	-0.02648946391813789	-0.2779695009950028	-0.3245874353072034	-0.7591977627699442	-0.8444509044733488	FALSE	FALSE	chr2_24150000_25250000	TAD_DOWN	0
ENSG00000236204	LINC01376	repressed	-0.212556285811089	-0.17077605835949994	-0.3930024695415136	-0.5183527001710986	-0.3636661063320616	-0.6024322018357692	-1.0056110582033404	TRUE	FALSE	chr2_18350000_19950000	TAD_UP	1
ENSG00000115363	EVA1A	repressed	-0.3925997093090003	-0.20033610186888043	-1.124884441344305	-0.9987920831979498	-1.070734744224631	-1.4804092958373305	-1.4240216645064447	FALSE	FALSE	chr2_74900000_75650000	TAD_UP	1
ENSG00000171150	SOCS5	repressed	0.026765255620369	-0.10990440644279682	-0.7537314315712809	-0.3207507317040853	-0.2251086888796902	-0.03481511777308305	0.13482861237477928	TRUE	FALSE	chr2_46650000_46900000	TAD_UP	1
ENSG00000271707	ATP1B3P1	repressed	-0.13120224685022772	-0.9293518089870144	-1.869066892409665	-0.47919790823032266	-0.4539900532310148	0.07109729127101624	-0.6232113160380359	FALSE	FALSE	NA	NA	NA
ENSG00000236090	LDHAP3	repressed	-0.6330602897421592	-1.2879305665253	-0.7447031835755884	-0.2733897037172123	-0.45641588722149945	-0.4199837388086602	-0.33657678253870255	FALSE	FALSE	chr2_39750000_41850000	NA	NA
ENSG00000234690	EPCAM-DT	repressed	0.10266979359458138	-0.4525136568315443	-0.8170374409321434	-2.2089684012679047	-0.6800753782469071	-0.9956781123815286	-0.9434772333042568	FALSE	FALSE	chr2_46900000_47400000	TAD_UP	1
ENSG00000152689	RASGRP3	repressed	-0.01645310952523296	0.04970996516774962	-0.4561316871264674	-0.31139904209289976	-1.2091524801295992	-1.6335991226833917	-2.16867608816559	FALSE	FALSE	chr2_32550000_33600000	TAD_UP	1
ENSG00000163235	TGFA	repressed	-0.209672121096078	0.25110517342954053	-0.6757977890529786	-0.691270189659162	-0.6332153667545388	-0.9432838765212548	-0.771414116472703	FALSE	TRUE	chr2_70250000_71000000	TAD_DOWN	0
ENSG00000222041	CYTOR	repressed	0.0754134856996744	0.18400463880303267	-0.2458101100781145	-0.6194529990905698	-0.8592129968149247	-0.6911210882284271	-0.8498944147699466	FALSE	FALSE	chr2_87450000_87550000	NA	NA
ENSG00000163064	EN1	repressed	0.3169256560709287	0.03382942114734219	-0.4542111685003565	-0.3137752995011506	-0.6506781043082004	-1.4425738388692722	-1.5271004319606718	FALSE	FALSE	chr2_118000000_119350000	TAD_UP	1
ENSG00000214533	KRT18P33	repressed	-0.3180347607144361	-1.519214110633336	-1.9832852842221995	-0.7378728181563718	-0.7201224431175628	0.07970591013835991	-0.00483068261015769	FALSE	FALSE	chr2_65600000_68100000	TAD_UP	1
ENSG00000235651	G3BP1P1	repressed	-0.14509216405118874	-0.7494731406376136	-0.620290859870165	-2.486455209179353	-0.8133236112774532	-0.5756342217046699	-1.79414631912148	FALSE	FALSE	chr2_134950000_135850000	NA	NA
ENSG00000119865	CNRIP1	repressed	-0.07578930342202414	-0.418941794348047	-0.6645395058532262	-0.4557012213779336	-0.6961545327316512	-0.5877009275982564	-0.9546532441435426	FALSE	FALSE	chr2_68300000_68450000	NA	NA
ENSG00000115461	IGFBP5	repressed	-0.3964470058006616	-0.06925435206767865	-0.3232121644792609	-0.8609645278810891	-0.5703873920143685	-1.2196139411031406	-1.0223398305189575	TRUE	FALSE	chr2_216500000_218200000	TAD_UP	1
ENSG00000172965	MIR4435-2HG	repressed	0.17590281900264118	0.23963565883240892	0.05307968601047189	-0.34358408416464764	-0.6696729478061484	-0.7920374827198292	-0.944684576500156	FALSE	FALSE	chr2_110650000_111750000	TAD_UP	1
ENSG00000136542	GALNT5	repressed	-0.4095338450809592	0.04028925026330466	-0.6987989798356752	-0.6131492255753083	-0.4300102390822913	-0.8626450437355656	-0.7238656076992429	FALSE	FALSE	chr2_157250000_158850000	TAD_UP	1
ENSG00000188042	ARL4C	repressed	-0.1798482917462397	-0.28371670595311177	-0.7791342748643111	-1.3699078462161471	-1.0984399366378417	-1.2887382902908089	-1.171491043174372	FALSE	FALSE	chr2_233850000_235800000	TAD_UP	1
ENSG00000163449	TMEM169	repressed	-0.11796867627777124	-0.20197893180593415	-0.544266812143563	-1.1405727385973787	-0.4764512330706861	-1.0117598821155047	-0.5704520303001	FALSE	FALSE	chr2_216050000_216150000	NA	NA
ENSG00000233608	TWIST2	repressed	-0.2580381409715727	-0.3474380880155224	-0.49230884532978886	-0.9651488371155236	-0.7403289991208215	-1.0730328775845426	-0.7477744219176041	FALSE	FALSE	chr2_237800000_240550000	TAD_UP	0.875
ENSG00000124839	RAB17	repressed	-1.2401413976732831	-1.058692933070316	-2.604940225531354	-2.003109035940382	-0.9131723659170058	-5.467297439087742	-2.724254285620044	FALSE	FALSE	chr2_237600000_237800000	NA	NA
ENSG00000136560	TANK	repressed	-0.10028474721065064	-0.06348429362393997	-0.8039133436364203	-0.5112299608644584	-0.5049530633031171	-0.3725097301109071	-0.2474500028025601	FALSE	FALSE	chr2_160050000_161150000	TAD_UP	1
ENSG00000285155	NA	repressed	-0.17886740282785893	0.3814389353513471	-0.32447409764004576	-1.2748577652276456	-0.5768503079497138	-0.8144401154131844	-1.1702684385765656	FALSE	FALSE	chr2_160050000_161150000	TAD_UP	1
ENSG00000003436	TFPI	repressed	0.02737546252384013	-0.0448010653202647	-0.34126093881509867	-0.7356143962308346	-0.5379031347172918	-0.7933304392846594	-0.9067935944723412	FALSE	FALSE	chr2_187500000_187600000	TAD_UP	1
ENSG00000183840	GPR39	repressed	-0.20772608650867264	-0.07919253797057953	-0.4250718269248765	-0.7727783911577543	-0.4882397918098691	-0.5480553538634199	-0.6280965500712832	FALSE	FALSE	chr2_130700000_134950000	TAD_UP	1
ENSG00000144476	ACKR3	repressed	-0.1666982662458535	0.06622617706328877	-0.8240282854964888	-0.983217354877492	-1.0466515892870103	-1.4218494269601292	-1.175260588090564	TRUE	FALSE	chr2_236200000_237100000	TAD_BALANCED	0.666666666666667
ENSG00000144583	MARCHF4	repressed	-0.06448891437808069	0.11726686977816274	-0.210075655922636	-0.6863794691879251	-1.2563127983171782	-1.3135870913461376	-1.6738790720150238	FALSE	TRUE	chr2_216150000_216500000	TAD_DOWN	0
ENSG00000123636	BAZ2B	repressed	0.05089650263731848	0.21085004820376033	-0.07915266538341287	-0.7626959966448822	-0.6485650827659614	-0.747656615044082	-0.6909828763725047	FALSE	FALSE	chr2_158850000_160050000	TAD_UP	1
ENSG00000136717	BIN1	repressed	0.03804984142558122	-0.2227795832661097	0.00421036407561068	-0.3437177961283222	-0.4569968522986202	-0.733230736198811	-0.8838790440794392	FALSE	TRUE	chr2_127050000_127700000	TAD_BALANCED	0.333333333333333
ENSG00000144366	GULP1	repressed	-0.056911619045948	0.13767528611560922	-0.40513684183678633	-0.6716163549261357	-0.4597145573822729	-0.832885941865604	-0.7688834804734928	FALSE	FALSE	NA	NA	NA
ENSG00000213236	YWHAZP2	repressed	0.02682376004028488	-0.2780025906259812	-1.0545872611185287	-0.4668718193664611	-0.463254194614398	-0.23540802283739037	0.03300458890627592	FALSE	FALSE	chr2_121800000_127050000	TAD_UP	1
ENSG00000153234	NR4A2	repressed	-0.3738442808698062	-0.9566614969023138	-2.042669581332301	-2.544545240183646	-2.495025638844566	-1.928187682454472	-2.108757894279665	FALSE	TRUE	chr2_156300000_156600000	TAD_DOWN	0
ENSG00000115419	GLS	repressed	-0.2522574372783969	0.12113524295203996	-0.5405463683693726	-0.6659596558467713	-0.7627285700898038	-1.0877575520262013	-0.8433200300284023	FALSE	FALSE	NA	NA	NA
ENSG00000228509	NA	repressed	-0.44663100290181146	0.26735400261854025	-0.8855078356079855	-1.4136365410131595	-1.0450397933681144	-1.6319647604767362	-1.0937935104198278	FALSE	FALSE	chr2_189650000_190850000	TAD_UP	0.833333333333333
ENSG00000138449	SLC40A1	repressed	-0.01006770707326647	-0.32501813727816536	-0.6608307404403447	-1.3016076636321992	-1.2790520707772897	-1.455034416234038	-1.3656172651984029	FALSE	FALSE	chr2_189450000_189650000	TAD_UP	1
ENSG00000135914	HTR2B	repressed	-0.23523968904481601	0.3732819984397435	-0.8391778433411297	-1.6544496710615548	-1.2558019254412454	-2.8657117645812775	-2.4656301755627275	FALSE	FALSE	chr2_230850000_231450000	TAD_DOWN	0
ENSG00000152082	MZT2B	repressed	-0.29744731820634435	-0.7785957574204875	-0.08045360148767698	-0.3376667844314899	-0.5425232071636784	-0.5460876224494611	-0.2927606919784552	FALSE	FALSE	chr2_130100000_130400000	NA	NA
ENSG00000163053	SLC16A14	repressed	-0.02524139024100044	-1.0079422892515404	-0.7516874469663404	-0.8281728990748685	-0.864799011615996	-0.9101827447196696	-0.8032753110867746	FALSE	FALSE	chr2_229900000_230850000	NA	NA
ENSG00000286207	NA	repressed	-0.36026844560739074	-0.8472792560123468	-1.7683230948620694	-0.8826196929134409	-1.1030435639384204	-2.540318958169147	-0.7154341059622645	FALSE	FALSE	chr2_152000000_152750000	TAD_UP	1
ENSG00000204406	MBD5	repressed	0.07067710176600817	-0.2133287274664198	-0.5919181405963211	-0.7899690055053233	-0.598484634388766	-0.6952564330845195	-0.5599870084843128	FALSE	FALSE	NA	NA	NA
ENSG00000243244	STON1	repressed	0.14236486016858915	-0.6315437311215866	-0.8672886916066844	-0.9902002089269252	-0.6863621451366139	-1.0750985187443796	-1.0245398257945362	FALSE	FALSE	chr2_47800000_48550000	TAD_UP	1
ENSG00000172428	COPS9	repressed	-0.12288005833782276	-0.2598613689293792	-0.7711596592313592	-0.28727447488917696	-0.4734120976623861	-0.2920760928241232	-0.2569927954080918	FALSE	FALSE	chr2_237800000_240550000	TAD_UP	0.875
ENSG00000115556	PLCD4	repressed	-0.13988256333493646	-0.27097820356175373	-0.5989843422143257	-0.7733646525313417	-0.26675907305740554	-0.8779461275939271	-0.9727617341479992	FALSE	FALSE	chr2_218550000_218650000	NA	NA
ENSG00000135905	DOCK10	repressed	-0.14568052436091725	0.11105814723170368	-0.2092993321789661	-0.5789701865290796	-0.6346643570505349	-1.1926856828325665	-1.1744761813721591	FALSE	FALSE	chr2_223900000_227350000	TAD_UP	0.923076923076923
ENSG00000227992	NA	repressed	-0.04144226918042634	0.18447307115990305	-0.3983709316012109	-0.734485097768106	-0.7022449712412917	-1.8831573542935125	-1.015551457982782	FALSE	FALSE	chr2_110650000_111750000	TAD_UP	1
ENSG00000123610	TNFAIP6	repressed	-0.03553671236249117	0.34891051593352396	-1.178618793284084	-1.1130566195200269	-1.1826255243136172	-1.6272560754213172	-1.7324211144069543	FALSE	FALSE	chr2_149550000_151450000	TAD_UP	1
ENSG00000196843	ARID5A	repressed	0.1934223408837327	-0.2629438419334268	-0.5184654950860283	-1.1114161202671418	-1.468529783927068	-1.7346064160216743	-0.9321159984917248	FALSE	FALSE	chr2_95950000_97150000	TAD_DOWN	0
ENSG00000158158	CNNM4	repressed	-0.0333612158363604	-0.14598634065517682	0.03857241424817323	-0.5349872007963993	-0.6223158574909847	-0.8484097315215914	-0.8223920441694176	FALSE	TRUE	chr2_95950000_97150000	TAD_DOWN	0
ENSG00000234997	NA	repressed	-0.0933718689242039	-0.4332141832350875	-0.8836064468779888	-1.1971510830711267	-0.8492017203480344	-0.6469956713013972	-0.7810767474011081	TRUE	FALSE	chr2_113050000_113450000	TAD_UP	1
ENSG00000115963	RND3	repressed	-0.11499658119156247	-0.246323073218892	-0.9071696261951588	-0.49983424584520714	-0.3533964937660573	-0.22736186356278912	-0.11669885621488124	FALSE	FALSE	chr2_149550000_151450000	TAD_UP	1
ENSG00000155760	FZD7	repressed	-0.02467969606948354	-0.07212632168762995	-0.3386581599120643	-0.8173187892767014	-0.7843812119669644	-0.7475214006551293	-1.0398737982061623	FALSE	FALSE	chr2_201750000_202200000	NA	NA
ENSG00000003137	CYP26B1	repressed	-0.05975794665935021	-0.4460012924255173	-0.461775427109282	-0.6550091669609864	-0.6143800083159069	-0.860896151797888	-0.7406754175240354	FALSE	TRUE	chr2_71000000_73300000	TAD_UP	0.875
ENSG00000170500	LONRF2	repressed	0.13250613646553447	0.1596668002262112	-0.3988627004976424	-0.9791553848604164	-0.8827740065152804	-1.1531386358182885	-1.10457481172692	FALSE	FALSE	chr2_99500000_100550000	TAD_DOWN	0
ENSG00000127824	TUBA4A	repressed	-0.17610693590046747	-0.15200169596662605	-0.2255066257703798	-0.20517537983664616	-0.37967088023541135	-0.5660653285606747	-0.7903518827333313	FALSE	TRUE	chr2_218950000_219400000	TAD_BALANCED	0.5
ENSG00000135924	DNAJB2	repressed	-0.3986169604098501	-0.2518846748410385	-0.7186670272323374	-0.966307103279161	-0.7319703225895429	-0.7613569476155068	-0.5028697913237952	FALSE	TRUE	chr2_218950000_219400000	TAD_BALANCED	0.5
ENSG00000168955	TM4SF20	repressed	-0.07157141169380293	-0.27842433172441494	-0.6785946600683188	-1.556355688354544	-1.24915549302426	-1.6848788334814957	-1.7602905187332027	FALSE	FALSE	chr2_227350000_227550000	TAD_BALANCED	0.333333333333333
ENSG00000135636	DYSF	repressed	-0.06713047028749931	-0.3957491351426365	-0.24845397114207352	-0.02870573494060276	-0.36352905058289525	-0.43835754305914726	-0.9945401688679536	FALSE	FALSE	chr2_71000000_73300000	TAD_UP	0.875
ENSG00000272282	LINC02084	repressed	-0.11219169201622392	-0.0595427476276455	-0.22927806678992815	-1.2365525697131314	-2.939324981529097	-0.7878244949992463	-2.487351656862639	FALSE	FALSE	chr3_27700000_28350000	TAD_UP	1
ENSG00000271943	NA	repressed	0.08305559280868685	-0.26617670555017936	-0.5078166681342926	-1.0751372885951038	-1.0112774966837634	-1.08299254238176	-0.9777942224521596	FALSE	FALSE	chr3_27300000_27700000	TAD_BALANCED	0.5
ENSG00000285906	NA	repressed	-0.22317903479635495	-0.2486013367220984	-0.520796113009898	-0.23463585355059208	-0.23862872264777857	-0.7881395173320692	-0.11850346334767736	FALSE	FALSE	chr3_8450000_15600000	TAD_UP	0.833333333333333
ENSG00000144596	GRIP2	repressed	-0.32662593620464103	-0.408772312786324	-0.3187741590853406	-0.8807250241826426	-0.5174159788480459	-0.924102318380542	-0.897404211600454	FALSE	FALSE	chr3_8450000_15600000	TAD_UP	0.833333333333333
ENSG00000071282	LMCD1	repressed	-0.04335262211921883	0.05988437871872642	-0.14940360920161683	-0.47357995255367513	-0.6766814629288045	-0.6796288173024646	-0.8746462991810379	FALSE	FALSE	chr3_8450000_15600000	TAD_UP	0.833333333333333
ENSG00000033867	SLC4A7	repressed	0.04066469754752352	0.1978827702524893	-0.32486643551871425	-0.5561183397119978	-0.6536915749499584	-0.7810808749266798	-0.8542333347771085	FALSE	FALSE	chr3_27300000_27700000	TAD_BALANCED	0.5
ENSG00000224094	RPS24P8	repressed	-0.31470764538386387	-1.0796118925668208	-1.8919048480500256	-0.9585579793395282	-1.3030634439233837	-0.9963267441604354	-0.7048175159123847	FALSE	FALSE	chr3_42650000_46650000	TAD_BALANCED	0.4
ENSG00000163491	NEK10	repressed	-0.04571488876781999	0.03487743725435314	-0.2417511758692425	-0.5457013581441352	-0.6547056193306265	-1.3196918420941717	-1.112909458225591	TRUE	FALSE	chr3_27300000_27700000	TAD_BALANCED	0.5
ENSG00000168301	KCTD6	repressed	-0.21555285221028528	-0.25756277386389814	-0.8405712786822506	-0.5456910203607789	-0.4915721571966311	-0.5936748188672255	-0.5260570211539507	FALSE	FALSE	NA	NA	NA
ENSG00000114541	FRMD4B	repressed	-0.1436442438050777	-1.0677317329451992	-2.0896795257381875	-2.5344327542859477	-1.9939073131512848	-1.3474579009652754	-1.4746078384217602	FALSE	FALSE	chr3_69450000_69650000	NA	NA
ENSG00000242516	LINC00960	repressed	-0.2370307813298704	-0.19731498564337308	-0.4666406407613008	-1.1537113624719568	-0.4166823085227986	-0.5163935316466682	-0.4719645675698136	FALSE	FALSE	chr3_73500000_75850000	NA	NA
ENSG00000144821	MYH15	repressed	-0.8014548986398411	-0.3800364431026312	-1.0429509971725004	-1.1359806470985705	-0.7847991988232356	-1.8816938006410493	-1.576694202755666	FALSE	FALSE	chr3_107200000_108550000	TAD_UP	1
ENSG00000213452	AKR1B1P2	repressed	-0.7055574919261346	-1.0133930114393677	-2.4120203704161067	-1.766714048288298	-0.7805617336228136	-2.063500678215927	-1.0675821441410225	FALSE	FALSE	chr3_73500000_75850000	NA	NA
ENSG00000163814	CDCP1	repressed	0.00391236077261923	-0.11417739601171252	-0.32623944303470775	-0.14382112583276285	-0.531715458945779	-0.6774472675452828	-0.854165646822896	FALSE	TRUE	chr3_42650000_46650000	TAD_BALANCED	0.4
ENSG00000168306	ACOX2	repressed	-0.00309322123080752	-0.6348286569145363	-0.0965490443241985	-0.422148774074757	-0.4984710446114003	-0.4418376485524935	-0.909285760943164	FALSE	FALSE	chr3_58500000_62700000	TAD_UP	1
ENSG00000144847	IGSF11	repressed	-0.12483824194213028	0.16028904218185158	0.1273574550394521	-0.4420716028020576	-0.36674430496533544	-0.7329154284334147	-0.8022783580355055	TRUE	FALSE	chr3_118850000_120600000	TAD_UP	0.75
ENSG00000214381	LINC00488	repressed	-0.5245842060447603	0.2660030437668329	-0.5427111442702197	-1.5804094602068406	-1.7759796614037051	-1.427784033785132	-2.2376459260000092	FALSE	FALSE	chr3_108600000_111700000	TAD_UP	0.833333333333333
ENSG00000240854	PSMC2P1	repressed	-0.5854195169544684	-0.9554480405894072	-3.021304418869746	-3.1885177615374887	-0.4599969085021827	-1.3681157508847115	-1.0426944942123435	FALSE	FALSE	chr3_131000000_132400000	TAD_UP	1
ENSG00000240891	PLCXD2	repressed	-0.11098481307223278	-0.17633966281023525	-0.869849853728125	-0.24950849913290615	-0.23105172906740576	-0.18488963440799427	-0.12629858209409522	FALSE	FALSE	chr3_108600000_111700000	TAD_UP	0.833333333333333
ENSG00000198829	SUCNR1	repressed	-0.07095338408427314	0.1631905424350287	-0.5362830006671936	-1.2730820506233993	-1.02531961733616	-1.0466936461360377	-1.157812741295695	FALSE	FALSE	chr3_151150000_152600000	TAD_UP	0.833333333333333
ENSG00000031081	ARHGAP31	repressed	-0.04373492830466714	0.09706852042813262	-0.8658762208639553	-0.43442938297923706	-0.10610436919546948	-0.7724893737478251	-0.4458651331384425	FALSE	FALSE	chr3_118850000_120600000	TAD_UP	0.75
ENSG00000159685	CHCHD6	repressed	-0.6789190991004704	-0.53678574251483	-0.09241139149301383	-0.9577703449620618	-0.631758625828949	-0.7990142121881378	-0.9196978175137404	FALSE	FALSE	chr3_126500000_127600000	TAD_UP	1
ENSG00000163762	TM4SF18	repressed	-0.16263175543544642	-0.01489344927309852	-0.295753237266283	-0.6153672222730595	-0.4958584085062677	-0.72727765122905	-0.762367390846094	FALSE	FALSE	chr3_148950000_149500000	TAD_BALANCED	0.6
ENSG00000114771	AADAC	repressed	0.0483831927651301	-0.03132167756912261	-0.5632060983824777	-1.0251771279795747	-0.6478438361824893	-0.842741327895622	-0.7512465153806277	FALSE	FALSE	chr3_151150000_152600000	TAD_UP	0.833333333333333
ENSG00000118849	RARRES1	repressed	-0.08103443222275665	-0.30336111092860896	-0.7456191581091	-1.2976674875461314	-0.33020346131707295	-0.6989728602466732	-0.641854895682087	FALSE	TRUE	chr3_158650000_160550000	TAD_UP	0.888888888888889
ENSG00000234851	RPL23AP42	repressed	-0.10427613024017872	-0.13064684605667437	-1.0782263745782128	-0.6658833737816048	-0.3419131046997173	-0.34636135876031154	-0.03370016254306946	FALSE	FALSE	chr3_160550000_161450000	TAD_UP	1
ENSG00000075651	PLD1	repressed	0.12794886322195553	-0.2885288299597974	-0.30644640121960803	-0.7652333787836122	-0.72540112444185	-0.6848762170206228	-0.7319311440266781	FALSE	FALSE	chr3_170850000_172750000	TAD_UP	1
ENSG00000243838	PSMC1P7	repressed	-0.8536889961882314	-0.848403115196663	-1.5910116301498982	-1.8644635821608333	-2.277220445718297	-0.29968590138596146	0.13538988212305458	FALSE	FALSE	chr3_160550000_161450000	TAD_UP	1
ENSG00000163584	RPL22L1	repressed	-0.00601822138419864	-0.1145207637165413	-1.302303555493076	-0.24047718901860993	-0.3369259402529355	-0.40123894154408657	-0.1888887524354013	FALSE	FALSE	chr3_170850000_172750000	TAD_UP	1
ENSG00000181449	SOX2	repressed	-0.20554191724110205	-0.6559698444765074	-2.8337192664957067	-2.178381360679264	-2.006173374390273	-2.717498627027606	-1.9202848195761184	FALSE	FALSE	chr3_181700000_182300000	NA	NA
ENSG00000250271	NA	repressed	0.08991621620927372	0.08767581144948042	-0.6885998319021307	-1.1703158402244764	-0.704317295909331	-1.572565731192454	-1.0653922168091887	FALSE	FALSE	chr3_151150000_152600000	TAD_UP	0.833333333333333
ENSG00000163898	LIPH	repressed	-0.03366322045264435	-0.20076873057991365	-0.5062692617418943	-0.8721765590697946	-0.7399667322475633	-0.9982815547607642	-1.1467460298236631	FALSE	FALSE	chr3_185300000_185600000	NA	NA
ENSG00000242299	NA	repressed	0.03173373820545427	-0.26377125343968105	-1.049306074289024	-0.3512340901577219	-0.7990410563661008	-0.3158450254439596	-0.3007754828534691	FALSE	FALSE	chr3_100300000_101700000	TAD_UP	1
ENSG00000134070	IRAK2	repressed	-0.3201686807137824	0.15457011852274485	-0.23798585561656657	-0.6571503197800216	-0.6585220618800414	-0.8821949501639015	-0.932158937543066	FALSE	TRUE	chr3_8450000_15600000	TAD_UP	0.833333333333333
ENSG00000163347	CLDN1	repressed	-0.11414031062089768	0.18572585424237864	-0.11721779671183928	-0.745988267387477	-0.7547771670760872	-1.04481855715094	-0.9333981994255957	FALSE	TRUE	chr3_189950000_190450000	TAD_BALANCED	0.666666666666667
ENSG00000168016	TRANK1	repressed	7.956522119501525e-5	-0.3448549050157217	-0.21411714359489395	-0.7671612602599108	-0.4046335902751873	-0.41155100277173984	-0.6997248998004121	FALSE	FALSE	chr3_33800000_37000000	TAD_UP	1
ENSG00000114805	PLCH1	repressed	0.15376810126788282	0.08600339446496227	0.03013917312071002	-0.5967897420550444	-0.4362805644288291	-0.9399970324258984	-0.920512864327045	FALSE	FALSE	chr3_155350000_155750000	TAD_UP	1
ENSG00000163536	SERPINI1	repressed	-0.17719168418766326	-0.08065437066955786	-0.5602925147199751	-0.9523318174255544	-0.19436454053680824	-0.7531869020239513	-0.5608465157455154	FALSE	FALSE	NA	NA	NA
ENSG00000185909	KLHDC8B	repressed	-0.05230608000049611	-0.5897994896723943	-0.5384992375695121	-0.4425247857495177	-0.626023974767248	-0.8440956857766783	-0.5667468909746725	FALSE	FALSE	chr3_49050000_49500000	TAD_DOWN	0
ENSG00000145014	TMEM44	repressed	-0.0855740833667539	-0.39570588010631885	-0.3477552042910536	-0.4408702767553416	-0.461083717344292	-0.5886518899987385	-0.7569439128706428	FALSE	FALSE	NA	NA	NA
ENSG00000073282	TP63	repressed	0.21440449090865676	0.04689854079643144	-0.18125872203257956	-1.9458870871858145	-2.2049801320783713	-2.2724731388311605	-2.4966838846946167	FALSE	FALSE	chr3_189250000_189950000	TAD_UP	1
ENSG00000271870	NA	repressed	0.13393970101215838	-0.1020548348365899	-1.1520072269548811	-0.296074961908034	0.05761721667052236	-0.32163866462989915	0.07985633761142781	FALSE	FALSE	chr3_50000_4300000	NA	NA
ENSG00000180044	C3orf80	repressed	0.12135350580220736	0.26349489454519315	-0.5153651611806723	-1.0762149708203872	-1.098619651973988	-0.7928879796072381	-1.1378041068892923	FALSE	FALSE	chr3_158650000_160550000	TAD_UP	0.888888888888889
ENSG00000144681	STAC	repressed	-0.1899155902700553	-0.3196035374510733	-0.23650728476452135	-0.969391361230226	-0.5790238146115302	-0.6600567420100052	-1.064742563808774	FALSE	FALSE	chr3_33800000_37000000	TAD_UP	1
ENSG00000016391	CHDH	repressed	-0.3888439398196955	-0.24526987428896488	-0.463258146207269	-0.26704432308210785	-0.5457876956007095	-0.9460933879926806	-0.748564428272736	FALSE	FALSE	chr3_53100000_53900000	TAD_UP	1
ENSG00000152580	IGSF10	repressed	0.11649319162699334	0.1735947412015932	0.15208210922403018	-0.8189400465390283	-0.3945864288094933	-0.6899196954499206	-0.8265566494615746	FALSE	FALSE	chr3_151150000_152600000	TAD_UP	0.833333333333333
ENSG00000250634	LINC01182	repressed	0.00370172039123791	-0.0078741075711834	-0.3604063702693095	-0.6742312310908255	-0.26493018193320694	-0.9682229720043728	-0.9861078077553336	FALSE	TRUE	chr4_13550000_15500000	TAD_DOWN	0.166666666666667
ENSG00000250321	NA	repressed	-0.6370831155735858	-1.0825697152526268	-1.023180705789004	-0.9892979247759252	-1.018906190088672	-0.4148399392882514	-0.08289633172341014	FALSE	FALSE	chr4_50000_650000	NA	NA
ENSG00000205940	HSP90AB2P	repressed	-0.526638134712189	-0.6627627890190064	-1.195750845738986	-0.6312207184162222	-0.9256169292772924	-0.7652964089171171	-1.116418664180407	FALSE	FALSE	chr4_9500000_13550000	TAD_UP	1
ENSG00000174130	TLR6	repressed	0.05196042674020814	0.1426469573276143	-0.5104252328204292	-1.2705379829140866	-1.168671563759715	-1.2381125018706334	-1.0887584451102963	FALSE	FALSE	chr4_38750000_39450000	NA	NA
ENSG00000251129	LINC02506	repressed	0.08033454312823096	-0.25987687770665924	-0.3855556876709372	-0.5814575067458294	-0.7490106137050316	-0.8541696591593615	-0.9178736902519536	FALSE	FALSE	NA	NA	NA
ENSG00000174125	TLR1	repressed	0.0784993902634778	-0.414749728845921	-1.0584386262385488	-1.4879028924608158	-1.4696933647781718	-1.8670045234786223	-1.8138162979779693	FALSE	FALSE	chr4_38750000_39450000	NA	NA
ENSG00000163739	CXCL1	repressed	-0.09834339340235314	-0.8959330262942204	-2.9312876047244987	-2.2362353418681264	-2.2307875337375735	-1.5201626436668667	-1.4021888050106508	FALSE	FALSE	chr4_73550000_74200000	TAD_UP	1
ENSG00000187653	TMSB4XP8	repressed	-0.2175424657175356	-0.3691982947726285	-1.0271903836788514	-0.2425287439869898	-0.23908925516179572	-0.30921234406295367	-0.21761168497495073	FALSE	FALSE	NA	NA	NA
ENSG00000163624	CDS1	repressed	-0.10063308828996696	-0.09680931935200308	-0.5679692080358273	-0.4392729980776743	-0.5570897518671275	-0.6593960586639823	-0.8274992723347772	FALSE	FALSE	chr4_84550000_84700000	NA	NA
ENSG00000163734	CXCL3	repressed	-0.8055780924127253	-1.2279017847335802	-2.188795567463823	-0.5801326024717451	-0.8622343090772302	-0.47084732910111354	-1.0977681324944064	FALSE	FALSE	chr4_73550000_74200000	TAD_UP	1
ENSG00000169429	CXCL8	repressed	-0.4833618740226732	-1.8366501264734207	-4.273486046448432	-3.5801694778313604	-2.684277934979463	-1.9685614748844993	-1.9061057411588205	FALSE	FALSE	chr4_73550000_74200000	TAD_UP	1
ENSG00000124882	EREG	repressed	-0.2901002423460467	-0.6795785896405578	-2.037720783300367	-2.468395766616898	-2.1958388162312743	-2.2335450045744127	-1.7104895252431775	TRUE	FALSE	chr4_74300000_74700000	TAD_UP	1
ENSG00000172403	SYNPO2	repressed	0.04796531158725747	-0.28871518800164175	-0.3446879030448403	-1.1081285334496838	-0.5687915121952453	-0.6119075645501421	-0.3302288016250266	FALSE	FALSE	chr4_118550000_119550000	TAD_UP	1
ENSG00000151012	SLC7A11	repressed	0.0871312798208685	0.3884847377767792	-0.08262778589966269	-0.728890650535641	-0.7889077030827008	-1.168865483796968	-1.4221876687144843	FALSE	FALSE	chr4_137650000_139000000	TAD_UP	1
ENSG00000134853	PDGFRA	repressed	-0.3269297134077196	-0.02997327385161037	-0.456394425324521	-0.9681114272502104	-0.732544510955931	-1.1707529000557464	-1.1190516239739314	TRUE	FALSE	chr4_51800000_57000000	TAD_UP	1
ENSG00000145358	DDIT4L	repressed	-0.06852480936590243	-0.4965194727547132	-1.3502826316108467	-1.8743171037396205	-1.6868873001422555	-1.553790394750069	-1.6312212001459196	FALSE	FALSE	chr4_99900000_103150000	TAD_UP	1
ENSG00000179299	NSUN7	repressed	-0.35964964396025123	-0.10938396612574744	0.1395182661395597	-0.07585602466981287	-0.14997272101584228	-0.9410577306315708	-0.4707840636698076	FALSE	FALSE	chr4_40000000_40750000	TAD_UP	1
ENSG00000245213	NA	repressed	-0.14536632069711508	-0.3617255664110284	-0.46360681340963944	-0.5265616634102956	-0.4239096792090494	-0.8017407462515196	-0.6985660435859182	FALSE	FALSE	chr4_173000000_173300000	NA	NA
ENSG00000109738	GLRB	repressed	-0.07965886806313598	-0.5630792916330832	-0.7595511302630079	-0.3663719139468947	-0.4440637906768541	-0.7556907509479086	-0.6306631634555789	FALSE	FALSE	chr4_155950000_157250000	TAD_UP	1
ENSG00000170390	DCLK2	repressed	-1.5120710599172903e-4	0.26972448379459424	0.10039037110375	-0.09997448665811896	-0.3467602996250207	-0.8004071347720584	-0.7612177095923545	TRUE	FALSE	chr4_149950000_151000000	TAD_UP	1
ENSG00000185477	GPRIN3	repressed	0.22308248780364137	0.03661791590427849	-0.7424406278534698	-1.5517156853319598	-1.5169245150715145	-1.3069085264101874	-1.2546331381685214	FALSE	FALSE	chr4_89150000_90000000	NA	NA
ENSG00000163644	PPM1K	repressed	-0.04485235450335753	-0.3044874789471005	-0.9933334654992572	-0.10951665131598552	0.09622205728717952	0.15944281695589058	0.2352509523240685	FALSE	FALSE	chr4_88200000_88500000	NA	NA
ENSG00000164128	NPY1R	repressed	-0.27399407686743016	0.10056908251759526	-0.4460546225779213	-1.730638423057593	-0.226057594139756	-2.2386855834430746	-0.9297019162740408	FALSE	FALSE	chr4_162450000_163550000	TAD_UP	1
ENSG00000181359	HSP90AA6P	repressed	-0.5432149605058186	-0.9497850639402484	-1.4944328741032975	-1.1710958581132809	-0.8732846514697321	-0.945427547883986	-0.6030382312128155	FALSE	FALSE	chr4_170050000_173000000	TAD_DOWN	0
ENSG00000109674	NEIL3	repressed	-0.00659146741406269	0.24405994093361608	0.27976649323277963	-0.6744216301881746	-1.0603457584947542	-1.1358979337539952	-1.0368112576221422	FALSE	FALSE	chr4_176350000_177550000	TAD_UP	1
ENSG00000150630	VEGFC	repressed	-0.00622699791606189	0.08589757424912178	-0.40906521038745297	-0.7667262098396038	-0.8301367180368512	-0.7960599516221034	-0.9753095883351766	FALSE	FALSE	chr4_176350000_177550000	TAD_UP	1
ENSG00000109321	AREG	repressed	0.06080103230770333	0.08840099915233034	-0.9151846554633012	-1.5247367397949618	-1.3730255634319486	-1.5425243855387851	-1.4829239335630455	FALSE	FALSE	chr4_74300000_74700000	TAD_UP	1
ENSG00000205100	HSP90AA4P	repressed	-0.3560318913591353	-1.263855013847808	-1.4663977669722257	-1.3668330813287473	-1.0560560542904054	-1.1486624278158917	-0.6491725440122457	FALSE	FALSE	chr4_186150000_190050000	TAD_BALANCED	0.444444444444444
ENSG00000163293	NIPAL1	repressed	-0.08430940838790375	-0.7511847141673907	-1.6687267064355742	-1.618692825928935	-0.6846560549242685	-0.16065642359725854	-0.8775447087351658	FALSE	FALSE	chr4_47350000_48100000	NA	NA
ENSG00000179967	PPP1R14BP3	repressed	-0.6314472663553279	-0.90227799343879	-0.6718104646473837	-0.5933981101814259	-0.8785133522369719	-0.3879595663012456	-0.666029712840188	FALSE	FALSE	chr4_139000000_139400000	NA	NA
ENSG00000137463	MGARP	repressed	0.10477106671375226	-0.14712272305960905	-0.32797798453348714	-0.4735089878422566	-0.15568449679185342	-0.6722101675773535	-0.8431252895957227	FALSE	FALSE	chr4_139000000_139400000	NA	NA
ENSG00000137440	FGFBP1	repressed	-1.149367560376257	-0.4296271103358144	-1.0075166301473797	-1.028808628640977	-1.271401028797481	-2.219448232066857	-2.0808592157480117	FALSE	FALSE	chr4_15700000_16300000	TAD_UP	0.8
ENSG00000248180	GAPDHP60	repressed	-0.20745422402962924	-1.0254248380197386	-1.7399545410315878	-0.7120345259535817	-1.22941315099334	-0.831304445284061	-0.6795583125499625	FALSE	FALSE	chr4_87150000_87500000	TAD_UP	1
ENSG00000137449	CPEB2	repressed	-0.18841083890965055	-0.5768711357844345	-1.3078192644957212	-1.1838464978768717	-1.0124769360710844	-0.9443003934671138	-0.7791991952891631	FALSE	TRUE	chr4_13550000_15500000	TAD_DOWN	0.166666666666667
ENSG00000181982	CCDC149	repressed	-0.1998283641013499	-0.3121910724380705	-0.0988989588418382	-0.19269087819645273	-0.25819192521758827	-0.45518306733524455	-0.9235419843444206	FALSE	FALSE	chr4_21750000_25400000	TAD_DOWN	0
ENSG00000151790	TDO2	repressed	-0.29748289492947677	-0.377536091105439	-0.543595869977753	-1.2750302996668272	-0.8994241008011509	-1.2947167532763897	-1.2462531870116562	FALSE	FALSE	chr4_154650000_155950000	NA	NA
ENSG00000236530	KPNA2P1	repressed	-1.4888937547806622	-0.4457738487044986	-1.1795088560908629	-1.8754177247502972	-1.69797347413245	-0.2642862193862636	-0.5475078738414433	FALSE	FALSE	chr4_80050000_80200000	NA	NA
ENSG00000121895	TMEM156	repressed	-0.07801184442351726	0.07229010444860308	-0.3355935495992077	-0.64746557996425	-0.4425076884772501	-0.9081491837555336	-1.0741466491526686	FALSE	FALSE	chr4_38750000_39450000	NA	NA
ENSG00000196526	AFAP1	repressed	-0.00771499387217492	0.06560962502557746	-0.5246755430419991	-0.8627920045452013	-0.904135781409099	-0.8694666542116416	-0.8484034118932359	FALSE	TRUE	chr4_7100000_8200000	TAD_BALANCED	0.5
ENSG00000243449	C4orf48	repressed	-0.5167849405853889	-0.755048955861478	-1.2536382553162522	-0.6950210473702749	-0.5910530125363378	-0.3251410360251503	-0.5113652867075247	FALSE	FALSE	chr4_1900000_3050000	TAD_UP	1
ENSG00000179046	TRIML2	repressed	-0.21030608323275	0.03184892070324311	-0.5978727543727009	-1.2737784519601063	-1.620540702279441	-2.308228961970794	-2.6393093884649885	FALSE	TRUE	chr4_186150000_190050000	TAD_BALANCED	0.444444444444444
ENSG00000145555	MYO10	repressed	0.1072881539160283	0.07507782088418302	0.00860397916640191	-0.34399094201547636	-0.40305593526678063	-0.49277973030725886	-0.7535793533724663	FALSE	TRUE	chr5_16450000_18350000	TAD_BALANCED	0.444444444444444
ENSG00000182836	PLCXD3	repressed	-0.49070912018151847	-0.12787947445443895	-0.7593375449238587	-0.7327185855970505	-0.22834890069311556	-1.0743514071943614	-1.150335622508747	FALSE	FALSE	chr5_40900000_41850000	TAD_UP	1
ENSG00000134363	FST	repressed	-0.2875472813841945	-0.4388453991934316	-1.2050236049551597	-2.6664893685505797	-2.8222928515110053	-2.6279789388004886	-3.3245734123644652	FALSE	FALSE	chr5_52750000_55150000	TAD_UP	0.8
ENSG00000249199	NA	repressed	-0.2061366681301883	-0.5277591265601327	-0.4483556211598907	-0.5835152922701408	-1.043761056272489	-1.36356875617922	-1.471447893816464	FALSE	FALSE	chr5_16450000_18350000	TAD_BALANCED	0.444444444444444
ENSG00000130449	ZSWIM6	repressed	0.05927272551205306	0.054711194436355	-0.6810307319710135	-0.9265101214851498	-0.8797620882579358	-0.8181415151584978	-0.7740230415296951	FALSE	FALSE	chr5_59800000_62350000	TAD_UP	1
ENSG00000134056	MRPS36	repressed	-0.11101416669026562	-0.0783837489764824	-0.8312091079360079	-0.3762736787801232	-0.2749049258913823	-0.12881969267871515	-0.25532589919502363	FALSE	FALSE	chr5_69050000_69400000	NA	NA
ENSG00000213763	ACTBP2	repressed	-0.5814740373230741	-1.2312173512998936	-1.4502965503834764	-0.7813622261986347	-1.1993626092186431	-0.8029515950590128	-0.6236245076343041	FALSE	FALSE	chr5_77500000_78300000	TAD_UP	1
ENSG00000153071	DAB2	repressed	-0.06762121502521569	0.0775829708809757	-0.098155852996098	-0.4684930319316564	-0.5336055717730099	-0.8235668321968102	-0.9015122436437396	FALSE	FALSE	chr5_38950000_39550000	TAD_UP	1
ENSG00000069020	MAST4	repressed	-0.15049303265600386	-0.08653633459918862	-0.2513219037282635	-0.990258723723171	-0.7099828945455072	-0.689396072778183	-0.7150449648683892	FALSE	FALSE	chr5_66150000_69050000	TAD_UP	0.909090909090909
ENSG00000132357	CARD6	repressed	-0.13528649930348563	-0.04442742747376822	-0.3959034841748265	-0.9209854288487912	-0.7821092680996432	-1.0497082206844055	-0.759531618904296	FALSE	FALSE	chr5_39550000_40900000	TAD_UP	1
ENSG00000248323	LUCAT1	repressed	-0.10247026617014784	-0.16164530298441848	-0.15572228700557	-1.1834148780250289	-1.113112959256543	-1.3908575682882385	-1.1736444814871738	FALSE	TRUE	chr5_90850000_91400000	TAD_UP	0.8
ENSG00000213757	RPS3AP20	repressed	-0.6014491810856826	-0.03734390096482147	-0.8824050653624269	-0.28357981425750756	-0.1675305753583334	-1.0331810809441908	-1.6890202467945956	FALSE	FALSE	chr5_79000000_80450000	NA	NA
ENSG00000113369	ARRDC3	repressed	-0.4455898060430235	-1.0703461775695726	-1.5365235115090567	-1.495754622191506	-1.2643353906662127	-0.7650216978305215	-0.519950681123746	TRUE	FALSE	chr5_90850000_91400000	TAD_UP	0.8
ENSG00000113361	CDH6	repressed	-0.23584939215055695	-0.30490486792910704	-0.7601690680061437	-1.665664869260987	-0.687280147850503	-1.6104484270728905	-2.3636408682796257	FALSE	FALSE	chr5_31100000_31200000	NA	NA
ENSG00000081059	TCF7	repressed	-0.0400981791721222	-0.06807797389726601	-0.3168053946531115	-0.6245547766823796	-0.529536449641551	-0.8443221416218472	-0.6396509243636068	FALSE	FALSE	chr5_134050000_134150000	NA	NA
ENSG00000176788	BASP1	repressed	0.04151185722254372	0.09921155212729928	-0.07462431669497357	-0.3707271002156146	-0.5092465388608705	-0.671738931366461	-0.7771535179691167	FALSE	TRUE	chr5_16450000_18350000	TAD_BALANCED	0.444444444444444
ENSG00000113532	ST8SIA4	repressed	0.03577078590351638	-0.03497288058044845	-1.0096215082918252	-2.2756367477012795	-2.0967700808250163	-2.301525577871403	-2.5916076038749547	FALSE	FALSE	NA	NA	NA
ENSG00000215196	BASP1-AS1	repressed	0.09266554111792086	-0.3001298603861696	-0.9925568674234276	-1.2499147759118463	-1.321041221581082	-1.1806323991659788	-1.7903921953415587	FALSE	TRUE	chr5_16450000_18350000	TAD_BALANCED	0.444444444444444
ENSG00000164220	F2RL2	repressed	-0.09025669327982068	0.11687080586749798	-0.3038818027359385	-0.6698675135118773	-0.6452593469994837	-0.8316336217684737	-0.9571198510631024	FALSE	FALSE	chr5_76600000_76850000	TAD_UP	1
ENSG00000171604	CXXC5	repressed	0.02656754117930231	-0.2155141170578403	-0.45736688008673776	-0.8231825505054161	-0.8735011894699826	-1.0522652789140583	-1.0452881616390182	FALSE	TRUE	chr5_139600000_139750000	TAD_DOWN	0
ENSG00000183775	KCTD16	repressed	0.04549168306600875	-0.1365119376492985	-0.9710743959613451	-0.8981316546233596	-1.039787147674787	-3.106048260984903	-1.669623888573116	FALSE	FALSE	chr5_142600000_144200000	TAD_UP	0.75
ENSG00000120318	ARAP3	repressed	0.02563652955937148	-0.3770407845667952	-0.1401056051291129	-0.2742026995239173	-0.5185362100719298	-0.44818031137132286	-0.7829960400659053	FALSE	FALSE	chr5_141600000_142000000	TAD_DOWN	0
ENSG00000169220	RGS14	repressed	-0.31825958515381175	-0.6326530827779445	-0.9612148401042132	-0.6629404613210423	-1.6086324210185774	-0.8689622773984895	-1.129152380263896	FALSE	FALSE	chr5_177300000_177500000	TAD_DOWN	0
ENSG00000184845	DRD1	repressed	-0.6812478474445598	-2.0216392651007498	-2.9884464799449124	-4.026437000376443	-2.940256203731552	-3.002020131812193	-2.662827487249269	FALSE	FALSE	chr5_172100000_176900000	TAD_UP	0.928571428571429
ENSG00000171992	SYNPO	repressed	-0.0931969236559138	-0.5221152867264405	-0.850989196212566	-0.8957182409449544	-0.7776596745356799	-0.7163942671391785	-0.6709593188803529	FALSE	FALSE	chr5_150450000_150750000	TAD_DOWN	0
ENSG00000164330	EBF1	repressed	-0.01254697904624454	-0.1278176185935371	0.02352698234534336	-1.3309693159736098	-1.3337041871506592	-1.5501601173231108	-1.952559897664936	FALSE	TRUE	chr5_157750000_159150000	TAD_BALANCED	0.333333333333333
ENSG00000161011	SQSTM1	repressed	-0.05205480357482267	-0.07469383518304422	0.08378849886732523	-0.532283737257186	-0.731156940237604	-0.985690450127138	-1.144286979020057	FALSE	FALSE	chr5_179800000_179900000	TAD_DOWN	0
ENSG00000204767	INSYN2B	repressed	-0.14576094196237088	0.3108741237126238	-0.24473985113911295	-0.4131680600472222	-0.7301262036452926	-1.1093390539452177	-1.1465436379357392	FALSE	FALSE	chr5_168250000_170650000	TAD_UP	1
ENSG00000131495	NDUFA2	repressed	-0.0489667032219158	-0.0977483454470387	-0.7622695646923721	-0.2176895076406825	-0.3230384273306666	-0.25313185180275505	-0.09904361269473362	FALSE	FALSE	chr5_140200000_140750000	TAD_UP	1
ENSG00000135083	CCNJL	repressed	-0.06420102664820199	-0.27618804598075297	-0.3922901434970442	-0.6669338206907044	-0.8039884708224853	-0.7125881832015843	-0.7748906580230934	FALSE	FALSE	chr5_160050000_160400000	NA	NA
ENSG00000171617	ENC1	repressed	-0.14715951889616127	-0.6478515357705477	-1.4657792035266286	-1.865182227957028	-1.241562554257095	-1.0959146144962273	-1.0895024157555138	TRUE	TRUE	chr5_73850000_74700000	TAD_BALANCED	0.333333333333333
ENSG00000070808	CAMK2A	repressed	0.0669617293961817	-0.20749717253364072	-0.33323543047953597	-0.4438765443653298	-0.8206234106729322	-1.0753041051356629	-1.0311764315242893	FALSE	TRUE	chr5_150000000_150450000	TAD_BALANCED	0.5
ENSG00000164379	FOXQ1	repressed	0.3235031979551227	0.45097502602827433	-0.01374073736284103	-0.4499304731538688	-0.5539504368742364	-0.5504310572128049	-0.809406281395491	FALSE	FALSE	chr6_150000_1550000	TAD_UP	1
ENSG00000196787	H2AC11	repressed	-0.2534393095514861	-0.08888940379071877	-0.4383162565615699	-0.7395338249532147	-0.6761944576896655	-1.071886393580184	-0.6243765829096249	FALSE	FALSE	NA	NA	NA
ENSG00000218069	RSL24D1P1	repressed	-0.3593158497300493	-0.4977839129880592	-1.5422374800772969	-1.4080637338600583	-0.6215071142592747	-0.4720795294420885	-0.8096555953573289	FALSE	FALSE	chr6_27150000_27800000	NA	NA
ENSG00000272142	LYRM4-AS1	repressed	-0.09638345139623844	-0.02995948675645941	-0.31820310101213545	-0.8792596154243371	-0.27871199636309607	-0.2340019806232729	-0.24761796482829937	FALSE	FALSE	chr6_4050000_5050000	TAD_BALANCED	0.333333333333333
ENSG00000095951	HIVEP1	repressed	0.01680046576720968	-0.07462784789736053	-0.5272887107584727	-0.8100681103316199	-0.6537835007967268	-0.6021390927163343	-0.7582135422090823	FALSE	TRUE	chr6_11550000_13600000	TAD_UP	0.818181818181818
ENSG00000112183	RBM24	repressed	-0.2026840354751941	-0.05883690425290531	-0.8719901708847343	-1.2863124275924502	-1.1803807685195409	-1.4253954197249319	-1.1827024182958066	FALSE	FALSE	chr6_17100000_18300000	NA	NA
ENSG00000278828	H3C10	repressed	-0.23929985104876303	-0.37415398411470246	-0.637650717598657	-0.7239667007737982	-0.4419460213851047	-0.9609246835795728	-0.5277985372356652	FALSE	FALSE	chr6_27800000_27900000	NA	NA
ENSG00000172197	MBOAT1	repressed	-0.00311771443963486	-0.09081732507729806	-0.09264263510102631	-0.4962386881758963	-0.41426768804918745	-0.8169974796760071	-0.6559709950518706	FALSE	FALSE	chr6_20100000_24500000	TAD_UP	0.875
ENSG00000007944	MYLIP	repressed	-0.05993076437533457	-0.3994690743279172	-0.893076828976325	-1.0355427415430192	-0.5435648716776655	-0.4626518972007857	-0.3094927144270685	FALSE	FALSE	chr6_15650000_16250000	NA	NA
ENSG00000146166	LGSN	repressed	0.03184966850735733	-0.2279556812608001	-0.2677931080991519	-0.7400369320514804	-0.7612124506199606	-1.013195402673312	-0.9856537817530854	FALSE	FALSE	chr6_63250000_63850000	TAD_BALANCED	0.5
ENSG00000220583	RPL35P2	repressed	-0.7320542537337871	-1.1828461133927135	-0.8664535987094784	-0.936879192719316	-0.1817117752636566	-1.0345985661089496	-2.021627002065446	FALSE	FALSE	chr6_33350000_35500000	TAD_UP	1
ENSG00000146233	CYP39A1	repressed	0.1005398939898242	-0.905059393651112	-0.7961403036615622	-1.9156307140132436	-0.5616173028364817	-1.1247144008257073	-1.79200983426507	FALSE	FALSE	chr6_46050000_47050000	TAD_UP	1
ENSG00000111850	SMIM8	repressed	0.08465996708587005	-0.05248918669177241	-0.35572814992944973	-0.7802106193324833	-0.5284219355418092	-0.00658360357033439	-0.00289632726020487	FALSE	FALSE	chr6_87050000_88950000	TAD_UP	1
ENSG00000197261	C6orf141	repressed	-0.12194205977628628	-0.7203085958464197	-1.8888732759355495	-2.498039192878467	-2.291514974922773	-2.5765741555424384	-2.1072546437727806	FALSE	FALSE	chr6_47600000_49900000	TAD_UP	1
ENSG00000135338	LCA5	repressed	-0.05642810447835231	-0.09304489232965409	-0.758046052815474	-0.638518175175868	-0.8333318670706201	-0.6870990489309875	-0.9101102803002408	FALSE	FALSE	chr6_79050000_79800000	TAD_UP	1
ENSG00000111912	NCOA7	repressed	-0.00969450459767011	-0.20507100255861604	-1.0816105138113663	-1.1682358556682135	-1.0834980814902757	-1.007779276101054	-0.9544598330076536	TRUE	TRUE	chr6_125750000_126000000	TAD_BALANCED	0.666666666666667
ENSG00000146250	PRSS35	repressed	-1.5430108698009872	-0.7457365608477815	-2.7635294438529376	-2.45866860843472	-1.4382173245439207	-3.1711769808188164	-2.803460221548347	FALSE	FALSE	chr6_83100000_83550000	NA	NA
ENSG00000146232	NFKBIE	repressed	-0.10642431408331478	-0.2980776031915206	-0.4122155365668799	-0.7944049754673375	-1.0299031803662644	-1.0125253057669892	-0.8649212121363534	FALSE	FALSE	chr6_44250000_44350000	NA	NA
ENSG00000178033	CALHM5	repressed	-0.2478508267897691	-0.5537236386428658	-0.8301932804079147	-1.1702429873611069	-1.4869221185954182	-1.4280617926301735	-1.456710947763418	FALSE	FALSE	chr6_116250000_116650000	NA	NA
ENSG00000226540	GAPDHP73	repressed	-0.9207683974718172	-1.5330171306292646	-1.6622013932569728	-1.019277090791748	-1.5533692474776957	-1.4000859617219596	-1.028609512424581	FALSE	FALSE	chr6_135450000_136350000	NA	NA
ENSG00000231683	NA	repressed	-0.1277153932497838	-0.05133747727359332	-0.04505602229455573	-0.5864158721757569	0.07359334695338346	-0.7514763303219463	-0.7627251573124096	FALSE	FALSE	chr6_53500000_53650000	NA	NA
ENSG00000146072	TNFRSF21	repressed	-0.02223050966590421	0.131690875091099	0.16728634164749467	-0.4093738129304423	-0.4844739682308227	-0.7657965804709757	-0.8264700541284832	FALSE	FALSE	chr6_47050000_47400000	TAD_BALANCED	0.5
ENSG00000135540	NHSL1	repressed	-0.01161935172926911	-0.01623997035682024	-0.0888135174727389	-0.8549819825338667	-0.2724657347250214	-0.8151886847551054	-0.6162328938997189	FALSE	FALSE	chr6_138100000_138800000	NA	NA
ENSG00000224417	NA	repressed	0.5912145771690364	-0.4725999213841737	-1.0811843325755093	-2.3511307462596966	-1.2097523403271684	-1.2486357427232635	-1.357949808210143	FALSE	FALSE	chr6_165350000_170600000	TAD_UP	0.75
ENSG00000233237	LINC00472	repressed	-0.3016057271380151	-0.10551623085393008	-1.1647765598073	-1.0224545927451785	-0.6861747811425525	-0.7087146057673752	-0.544494657097073	TRUE	FALSE	chr6_71150000_71550000	TAD_UP	1
ENSG00000203727	SAMD5	repressed	0.07465447398717784	0.17358885097127566	-0.2523551266492235	-0.6977758814038082	-0.7042435491799646	-0.8055134710234573	-1.11234755682073	FALSE	FALSE	chr6_147400000_148550000	TAD_UP	1
ENSG00000146411	SLC2A12	repressed	-0.0989413610614508	-0.660797383455962	-0.32223956546170196	-0.9438601055250108	-0.6296914257710524	-1.2454981052552074	-1.3252558626115327	FALSE	FALSE	chr6_132800000_134100000	TAD_UP	0.916666666666667
ENSG00000203711	C6orf99	repressed	0.04854602848466315	0.308922667182153	-0.2191731975208744	-0.2539938985091475	-0.06082436440997334	-0.3071789750179333	-0.8564439554033124	FALSE	FALSE	chr6_158700000_159000000	TAD_UP	1
ENSG00000111981	ULBP1	repressed	0.2631940464808735	-0.04745151544260239	-0.10061957506445564	-0.8826668547734888	-0.3052700561064491	-0.7771226639727622	-0.7194137364664281	FALSE	FALSE	chr6_149900000_150850000	TAD_UP	1
ENSG00000146376	ARHGAP18	repressed	-0.2427335418758871	0.003985281714644	-0.516218460606794	-0.7490228080807871	-0.5176513585645427	-0.8757509956751981	-0.9251856684193132	FALSE	FALSE	chr6_129450000_130050000	TAD_UP	1
ENSG00000171408	PDE7B	repressed	0.1323819083072365	0.16674612589518056	0.1046385676365838	-1.0006431317931774	-1.2163117174116878	-1.4322431576957773	-1.3718362225444174	FALSE	FALSE	chr6_135450000_136350000	NA	NA
ENSG00000164488	DACT2	repressed	0.5029512549728352	-0.571620345493502	-1.896319948182084	-1.7581373841739891	-1.9209315906551092	-1.7658417183969408	-1.520121254681703	FALSE	FALSE	chr6_165350000_170600000	TAD_UP	0.75
ENSG00000260418	NA	repressed	-0.14817218459402037	0.222578910541209	-0.2903353191261684	-0.32697814139793624	-0.6763250136075691	-0.6375298873373866	-0.7691095801729732	FALSE	FALSE	chr6_135450000_136350000	NA	NA
ENSG00000230438	SERPINB9P1	repressed	0.18593612367581788	-0.3013935956354878	-0.789466308936924	-1.171603250996416	-1.0979105555901796	-1.921074937995358	-1.4137615720082932	FALSE	TRUE	chr6_2750000_3000000	TAD_DOWN	0
ENSG00000170542	SERPINB9	repressed	0.08167922060693696	-0.04255176018308185	-0.6455805876441634	-1.0821331713712354	-0.8780904019847499	-0.7294606632500114	-0.705063113712367	FALSE	FALSE	chr6_2750000_3000000	TAD_DOWN	0
ENSG00000244041	LINC01011	repressed	-0.3537256555669855	-0.43224957268583875	-0.3513481731722879	-0.8145456267323168	-0.5243895312893773	-1.955407272799484	-0.6980577363516856	FALSE	FALSE	chr6_2750000_3000000	TAD_DOWN	0
ENSG00000272341	NA	repressed	0.06288203215963246	-0.14745155787131706	-0.6109829398407479	-1.5720334188610463	-0.5509751678413625	-0.8001198526003911	-0.4418826435193681	FALSE	FALSE	chr6_16250000_17100000	TAD_UP	1
ENSG00000229852	NA	repressed	-0.08814687351706893	-0.2885391012335214	-0.6717679726102341	-0.891344976818675	-0.6595136126122002	-0.6395582911088116	-1.1386784427873329	FALSE	FALSE	chr6_72400000_73400000	NA	NA
ENSG00000187837	H1-2	repressed	0.00562769949149778	-0.4942526302984648	-0.6769280242183869	-0.24560717826914427	-0.3430821081637431	-1.1642586391983414	-0.5231984335372135	FALSE	FALSE	chr6_26000000_26100000	NA	NA
ENSG00000158373	H2BC5	repressed	-0.20867061198920855	-0.2453174234093319	-0.7832419260117567	-0.7018054368108462	-0.4902443447306323	-0.7752489176990002	-0.7681955182674399	FALSE	FALSE	chr6_26100000_26200000	NA	NA
ENSG00000274290	H2BC6	repressed	0.14112085235479685	-0.5279610340759383	-0.7987199638604845	-0.6953010294349186	-0.669186454330895	-0.5625092888415406	-0.5161376229195959	FALSE	FALSE	chr6_26100000_26200000	NA	NA
ENSG00000272189	NA	repressed	-0.1774240398161735	-0.4072569056821842	-0.092352247401673	-0.515363140401648	-1.0090742796577112	-0.727569383076547	-1.3475266121675151	FALSE	FALSE	chr6_136550000_136800000	TAD_UP	1
ENSG00000242574	HLA-DMB	repressed	-0.392172820561118	-0.2082905566688929	-0.6475551472252807	-0.573153641542086	-0.5457650572752187	-1.3305468449046136	-1.6207304347689446	FALSE	FALSE	chr6_32750000_33150000	NA	NA
ENSG00000204389	HSPA1A	repressed	-0.08242157049114275	-1.1111518574587076	-1.3841172200833851	-1.486314516069111	-1.5622857346526984	-1.605612762051739	-1.6395493375990844	FALSE	FALSE	chr6_31500000_32200000	TAD_DOWN	0
ENSG00000204388	HSPA1B	repressed	-0.04937287851111449	-0.91001275848162555	-1.1978418840002982	-1.390660136037465	-1.4127075167354548	-1.2653002245732736	-1.2929935156146433	FALSE	FALSE	chr6_31500000_32200000	TAD_DOWN	0
ENSG00000137203	TFAP2A	repressed	-0.07611536230387402	-0.487304241531938	-0.9835238866830056	-1.2069220216422738	-1.0219677526240412	-0.8816403883638424	-0.8040273510942944	FALSE	TRUE	chr6_8100000_10500000	TAD_BALANCED	0.333333333333333
ENSG00000111846	GCNT2	repressed	-0.11561461591881748	0.05432990444732231	-0.7790985970270424	-1.2006759478471971	-0.8651042493161634	-1.0360027871435813	-0.672920497665852	FALSE	FALSE	chr6_8100000_10500000	TAD_BALANCED	0.333333333333333
ENSG00000078269	SYNJ2	repressed	-0.01363371448583516	-0.00952115975630651	0.03553803726318841	-0.4745687868028981	-0.6902913161449833	-1.0504375429538375	-1.177463997428866	TRUE	TRUE	chr6_157300000_158200000	TAD_DOWN	0.25
ENSG00000135334	AKIRIN2	repressed	-0.13626578430300532	-0.07507796272515255	-0.9485839550859602	-0.7953055171749658	-0.7665764751142398	-0.5923535811819488	-0.6338037681762017	FALSE	FALSE	chr6_87050000_88950000	TAD_UP	1
ENSG00000204616	TRIM31	repressed	-0.5296680539896081	-0.7951450858987508	-1.2516250259323087	-2.0407644203781414	-0.6304475465459094	-0.8672462112300144	-0.7821924253055746	FALSE	FALSE	chr6_29650000_30200000	NA	NA
ENSG00000137266	SLC22A23	repressed	0.10536964846169482	-0.17812977761784612	0.19539034953744855	-0.31254195422523756	-0.2862756259534734	-0.5764743353898656	-0.8614606014241216	FALSE	TRUE	chr6_3100000_4050000	TAD_BALANCED	0.333333333333333
ENSG00000153291	SLC25A27	repressed	-0.4759072626660302	-0.49770564736414286	-0.74196733608938	-1.081994283760053	-1.4010613506610543	-1.787826008644127	-1.0178597377850391	FALSE	FALSE	chr6_46050000_47050000	TAD_UP	1
ENSG00000197061	H4C3	repressed	-0.46763175053877704	-2.5923663169925852	-1.4670750449904062	-1.5021350320200626	-0.6989423982718593	-0.5143019807129001	-0.2775602488095651	FALSE	FALSE	chr6_26100000_26200000	NA	NA
ENSG00000229921	KIF25-AS1	repressed	0.33264922430223	0.04214174908443221	0.05238479433368324	-1.073517938961439	-0.8191544345991867	-1.81433896356211	-1.7129812211476918	FALSE	FALSE	chr6_165350000_170600000	TAD_UP	0.75
ENSG00000217733	CCT7P1	repressed	-0.6359106770303325	-1.3261634095428452	-1.6186219062378682	-1.3120134509185033	-1.167799806132443	-0.4779815297056137	-0.0074706156788015	FALSE	FALSE	chr6_149800000_149900000	NA	NA
ENSG00000112576	CCND3	repressed	-0.11315995930849916	-0.19229696219012177	-0.3744999822229767	-0.6566079663216785	-0.806297466301926	-0.8567089569829045	-1.0766587766514617	FALSE	FALSE	chr6_42050000_42200000	TAD_UP	1
ENSG00000135525	MAP7	repressed	-0.00531319495129456	0.25067126493917335	-0.04454766290278352	-0.5701250596857307	-0.46137285185411114	-0.7695803419850356	-0.9150555596042792	FALSE	FALSE	chr6_136550000_136800000	TAD_UP	1
ENSG00000131018	SYNE1	repressed	0.04520765352788969	0.04168233311750431	-0.12976902290325765	-0.7828388965135294	-0.9470695981015664	-1.1357069114245657	-1.4645040075587303	FALSE	FALSE	chr6_151500000_152700000	TAD_DOWN	0
ENSG00000234155	LINC02535	repressed	-0.33471089854341624	-0.5139642895493957	-0.9185961420927508	-1.7684101512939066	-1.7058829968432216	-2.4956311007753333	-1.75289112593789	FALSE	FALSE	chr6_85350000_85550000	TAD_UP	1
ENSG00000112245	PTP4A1	repressed	0.1791994060044811	0.08124513641284374	-0.2219582884221075	-0.9958002702779136	-1.0770902608306374	-0.9629254216665464	-1.5586104410705803	TRUE	TRUE	chr6_63250000_63850000	TAD_BALANCED	0.5
ENSG00000157927	RADIL	repressed	-0.05802965282341318	-0.0667555284522696	-0.06111473662288045	-0.07302171336833536	-0.0154550611128977	-0.19781789435683023	-0.8287407061861097	FALSE	FALSE	chr7_2600000_5200000	TAD_UP	1
ENSG00000230487	PSMG3-AS1	repressed	0.14964521394672223	-0.7555665506756343	-0.5831018978361301	-0.6334557451995205	-0.4438789494356787	-0.5765856285423469	-0.7603743959686685	FALSE	FALSE	chr7_1550000_2450000	TAD_BALANCED	0.5
ENSG00000230370	RPL23AP52	repressed	-0.9456513729963076	-1.151241608262079	-2.2158160131712674	-1.8403712957567515	-1.3861615864375705	-1.0854858746494214	-0.8319964062104315	FALSE	FALSE	NA	NA	NA
ENSG00000164877	MICALL2	repressed	0.09047738431106175	-0.21210554609420385	-0.40249424736702255	-0.579264116413448	-0.8575873770334267	-0.8823208854011357	-0.7392346209959512	FALSE	FALSE	chr7_1450000_1550000	TAD_DOWN	0
ENSG00000006468	ETV1	repressed	0.2283448912592816	-0.08701306079375429	-0.3058396946670245	-0.7497114705611385	-0.840350582862846	-0.682820638650345	-0.65950098141171	FALSE	FALSE	NA	NA	NA
ENSG00000106546	AHR	repressed	0.01825958488728099	0.14888879117698578	-0.9139270694000884	-0.7055003921604309	-0.5151576359265919	-0.2636228509920756	-0.08081274737098476	FALSE	FALSE	chr7_16600000_17750000	TAD_UP	1
ENSG00000198517	MAFK	repressed	-0.07021299164656032	-0.5085004019681476	-0.9289051793391688	-1.4117652459571963	-1.6541403960875365	-1.7420837801978666	-1.637349323971732	FALSE	TRUE	chr7_1450000_1550000	TAD_DOWN	0
ENSG00000224785	NA	repressed	-0.518319669609933	-1.6309799357159454	-1.247966552584423	-1.2790556554700898	-1.3549170654710705	-0.5762286629110388	-0.08082432855564702	FALSE	FALSE	chr7_23550000_25150000	TAD_UP	1
ENSG00000106483	SFRP4	repressed	-0.0134774200267404	0.120027751230937	-0.29960681388630067	-0.3481558846747002	-0.3618431438288077	-0.7025380738729056	-0.7627401932425629	FALSE	FALSE	chr7_36400000_38400000	TAD_UP	1
ENSG00000075213	SEMA3A	repressed	0.1121753825420594	0.13895018297720174	0.04559002991449436	-0.7437934689232947	-0.742715240909672	-1.4245359810685665	-1.472195948699223	FALSE	FALSE	NA	NA	NA
ENSG00000177409	SAMD9L	repressed	0.14355492372119508	-0.11121065446613818	-0.44903164095314774	-0.5629686763847814	-0.4955212645413495	-0.8885239962959278	-0.7760608299481963	FALSE	FALSE	chr7_93100000_93200000	NA	NA
ENSG00000205413	SAMD9	repressed	-0.0249764055019685	-0.02248822437692411	-0.603951638374798	-0.7398536743954849	-0.5729869300888367	-0.9040792425024028	-0.843141886837335	FALSE	FALSE	chr7_93100000_93200000	NA	NA
ENSG00000005981	ASB4	repressed	-0.05251133762907094	-0.27775000368728753	-0.8719195028324508	-1.654874762654096	-1.0201366292108502	-0.6418746998000486	-1.1321175897620943	FALSE	FALSE	chr7_93550000_95700000	TAD_UP	0.818181818181818
ENSG00000157214	STEAP2	repressed	0.09368695923413352	-0.1679538479949911	-0.6249539930865669	-0.8894554824399152	-0.6434957842894479	-0.8943380218921687	-0.8758730303712873	FALSE	FALSE	chr7_90100000_90450000	NA	NA
ENSG00000214389	RPS3AP26	repressed	-0.3765510471566176	-0.6314046736102509	-0.8790511475931457	-0.3711883877815506	-0.2755596378727839	-0.5144853842439192	-0.8344879337650827	FALSE	FALSE	chr7_98200000_98900000	TAD_DOWN	0
ENSG00000154678	PDE1C	repressed	0.02441328357904854	0.18980897055365129	-0.13938392922130963	-0.5820181749808826	-0.6175619116414124	-1.139818746628316	-1.2663280722466406	FALSE	FALSE	chr7_30700000_32500000	TAD_DOWN	0.2
ENSG00000273297	NA	repressed	-0.4282679188732776	-0.05541537419502866	-0.6315905589900196	-0.9889780072422448	-0.5683481669824789	-1.0185157030067349	-1.0672179770733932	FALSE	TRUE	chr7_131500000_134600000	TAD_BALANCED	0.571428571428571
ENSG00000006453	BAIAP2L1	repressed	-0.05276540760324457	-0.0967684318335742	-0.13261300060228962	-0.554891787619703	-0.553470269722102	-0.6999868880235408	-0.7806841835817926	FALSE	TRUE	chr7_98200000_98900000	TAD_DOWN	0
ENSG00000196335	STK31	repressed	-0.2969892540950487	0.07738689708762021	-0.8324708264092118	-0.4585189870935188	-0.13644865660309496	0.07166317443952519	-0.27631633523536797	FALSE	FALSE	chr7_23550000_25150000	TAD_UP	1
ENSG00000228742	LINC02577	repressed	-0.2532063730780973	-0.01405084451723835	-0.5917872436768487	-0.9304790757196456	-0.3001911301301321	-0.7512431900418128	-0.4363565665450741	FALSE	FALSE	chr7_106750000_107150000	NA	NA
ENSG00000181444	ZNF467	repressed	0.04321118801063468	-0.8077550468463102	-1.4086920946302162	-0.9326452905395772	-0.7650327606566825	-0.8307766714457183	-0.7112871224778542	FALSE	FALSE	chr7_148100000_159345973	TAD_UP	0.777777777777778
ENSG00000227471	AKR1B15	repressed	-0.300664485426218	-0.26668485526091024	-0.5666840443749086	-0.9109689489393502	-0.7082333321965915	-0.8179940922831581	-0.9181177642520156	FALSE	FALSE	chr7_131500000_134600000	TAD_BALANCED	0.571428571428571
ENSG00000240204	SMKR1	repressed	0.002884308337171	-0.0828518821003399	-0.21073957771863697	-0.5566736606212671	-0.6464193304276175	-0.6236578829255769	-1.070459708421786	FALSE	FALSE	chr7_129150000_130050000	TAD_UP	1
ENSG00000204934	ATP6V0E2-AS1	repressed	0.06097892251386317	0.05770158905170232	-0.11349750690322788	-0.14468225893516196	-0.1289772735682524	-0.4974368609375101	-0.8677116299246095	FALSE	FALSE	chr7_148100000_159345973	TAD_UP	0.777777777777778
ENSG00000128510	CPA4	repressed	-0.1946955403254376	0.22318408749648672	0.03942901168918636	0.27685569458324294	-0.17934964348464508	-0.7134968428345533	-0.8932641894953859	FALSE	FALSE	chr7_130050000_130850000	NA	NA
ENSG00000213280	NA	repressed	-0.344457189821434	-1.6606238498490722	-1.5082964890294757	-0.6863318846168458	-1.260076285213465	-0.7658932481996119	-0.8285131107632029	FALSE	FALSE	chr7_128350000_129150000	NA	NA
ENSG00000105792	CFAP69	repressed	0.03568454584827851	-0.03511697414009394	-0.4274157729668489	-0.7731902296586141	-0.8110456334625554	-0.9236538769030884	-0.794357873764795	FALSE	FALSE	chr7_90100000_90450000	NA	NA
ENSG00000229161	TCP1P1	repressed	-0.03503825711588356	-0.7718503898098354	-1.8379684500509996	-0.9940815960977016	-1.0568472834249485	-0.7481212199074971	-0.5013668435222759	FALSE	FALSE	chr7_41900000_42900000	NA	NA
ENSG00000170629	DPY19L2P2	repressed	-0.11315513615870051	-0.2710714148261562	-0.4190226511017092	-0.5979552915844907	-0.4676400474378851	-0.9664816526765584	-0.6294178804254078	FALSE	FALSE	chr7_103250000_103350000	NA	NA
ENSG00000106665	CLIP2	repressed	-0.17383067018226214	-0.6200858976064854	-0.8408499304309353	-1.2471563928143723	-0.9904945749636892	-1.498457811765778	-1.610172504422065	FALSE	TRUE	chr7_74200000_74400000	TAD_DOWN	0
ENSG00000006606	CCL26	repressed	-0.3944664528706328	-0.6562555260947645	-0.5886255272351256	-1.036057668943483	-0.494997888950774	-1.1278490664261285	-0.9633868177031736	FALSE	FALSE	chr7_75400000_76400000	TAD_UP	1
ENSG00000279483	NA	repressed	-0.2670137207974311	-1.2534552556983098	-0.35761373038265243	-1.4922141498293109	-1.2025641026302656	-0.6588359328214026	-0.7992816813242796	FALSE	FALSE	NA	NA	NA
ENSG00000146674	IGFBP3	repressed	0.2605478363001418	0.24168268284687777	0.37888815490661576	0.15446104237352293	-0.4550880683251465	-0.5268341013119008	-0.936078970131829	FALSE	TRUE	chr7_45150000_47350000	TAD_BALANCED	0.5
ENSG00000164690	SHH	repressed	-0.1499987873955526	-0.5228509657541066	-1.0611467855471222	-2.020994636157603	-1.3534115564631888	-1.8995276781761767	-1.3175051636965096	FALSE	FALSE	chr7_148100000_159345973	TAD_UP	0.777777777777778
ENSG00000005073	HOXA11	repressed	0.14130216279730692	0.01061936507317604	-0.8716505897363673	-0.8244672255616086	-0.3930460464170422	-1.226659840386341	-1.555149939559776	FALSE	FALSE	chr7_27150000_28150000	TAD_UP	1
ENSG00000105997	HOXA3	repressed	0.0633612203865301	-0.29315943858417093	-0.6715253575410667	-0.9864095250714384	-0.8409161149964329	-0.8043562949726764	-0.7085201946780544	FALSE	FALSE	chr7_27150000_28150000	TAD_UP	1
ENSG00000235587	GAPDHP65	repressed	-0.6507674559553193	-0.8040713215763545	-0.8828598319067366	-0.7822377446291702	-0.6782367671522351	-0.5412344586361161	-0.7047834897389484	FALSE	FALSE	chrX_43800000_47100000	TAD_UP	0.75
ENSG00000169297	NR0B1	repressed	-0.08342790693250494	-0.20997983700661804	-0.2288411586818125	-1.222745183822337	-1.3432684167785611	-1.7433382518615452	-1.833908321603767	FALSE	TRUE	chrX_27450000_30550000	TAD_DOWN	0
ENSG00000270069	MIR222HG	repressed	-0.3082067984512435	-0.7041802414764515	-1.3272232824750472	-0.7705478019846399	-0.6586102060273831	-0.8803155146448832	-0.5636459464186814	FALSE	FALSE	chrX_43800000_47100000	TAD_UP	0.75
ENSG00000102096	PIM2	repressed	-0.2946121380763084	0.00817241690084171	-0.8479975911038294	-0.28670716281056585	-0.4681445226352016	-0.5903882850719093	-0.7240090697083903	FALSE	FALSE	chrX_48600000_49200000	NA	NA
ENSG00000124429	POF1B	repressed	0.0488493690594147	-0.0916812159716705	-0.4769593309687272	-0.7906339520988686	-0.5829128085522369	-0.6512688209450103	-0.5341610238110316	FALSE	FALSE	chrX_85100000_85550000	NA	NA
ENSG00000102057	KCND1	repressed	-0.06576028916764512	-0.8366698734484069	-1.0288447346435263	-0.5884649369291498	-0.5151407587425934	-0.19451259310620653	-0.34930204019342886	FALSE	FALSE	chrX_48600000_49200000	NA	NA
ENSG00000215007	DNAJA1P3	repressed	-0.8073791814135044	-1.5087967050051834	-2.7320351665337923	-1.1970126573589654	-1.5885914219534547	-1.70717537161996	-1.3717948699244145	FALSE	FALSE	chrX_106800000_108150000	TAD_BALANCED	0.642857142857143
ENSG00000226532	NA	repressed	-0.5896942006885375	-1.2020566697421915	-2.354915113232088	-0.8999663257887436	-1.1261921021359738	-1.266364928830528	-0.8881152060605798	FALSE	FALSE	NA	NA	NA
ENSG00000234176	HSPA8P1	repressed	-0.28761202504148803	-0.7378075958696123	-1.3047373068822254	-0.8849251132250366	-0.8709150263290821	-0.5575973136632795	-0.6682244564874575	FALSE	FALSE	chrX_121000000_123550000	TAD_UP	1
ENSG00000224773	HSPA8P7	repressed	-0.7500742117654171	-0.6840257312932819	-1.6745157521151637	-1.4410094944713197	-0.9201668339828049	-1.1341670258321612	-1.3088852340714878	FALSE	FALSE	chrX_110450000_115300000	NA	NA
ENSG00000268089	GABRQ	repressed	0.3248394577134666	0.4261147222491607	0.605425349229107	0.17064051419046233	-0.0980736360065133	-0.3989123685590532	-0.8501977008045315	FALSE	FALSE	chrX_151100000_152950000	NA	NA
ENSG00000204131	NHSL2	repressed	0.1197403390294952	-0.09856485844816562	-0.9251407579616856	-0.5078368536779497	-0.44691269302557834	-0.9805007215525862	-1.372243357530192	FALSE	FALSE	chrX_71900000_72200000	NA	NA
ENSG00000275110	NA	repressed	0.07482386275697529	-5.423947469092378	-2.5607188810249877	-2.3488043166360955	-2.392863087914605	-2.487988835174048	-2.1629959778800747	FALSE	FALSE	chrX_108700000_109450000	NA	NA
ENSG00000203930	LINC00632	repressed	-0.29826654759049287	-0.1555965895696777	-0.4493672294709796	-1.506962969304711	-0.6670696412137237	-1.061390595878462	-1.0026054593041056	FALSE	FALSE	chrX_137100000_140750000	NA	NA
ENSG00000188158	NHS	repressed	0.07951066635023334	0.1705983031195633	-0.1675028657428654	-1.0212384209416063	-1.5400546126556038	-1.353744058622192	-1.3605944379472616	FALSE	TRUE	chrX_16750000_20150000	TAD_BALANCED	0.666666666666667
ENSG00000221994	ZNF630	repressed	-0.02882237939736845	-0.40804563220952467	-0.23631813861148213	-0.9337071309756054	-0.4461421282096661	-1.1853309773649938	-1.982082820593373	FALSE	FALSE	chrX_47150000_48600000	TAD_UP	1
ENSG00000232368	FTLP2	repressed	-0.23664695778526923	-0.8321465345327788	-0.8797005454062086	-0.8742185832454494	-0.7379558795729579	-0.33616826176190906	-0.6263396890279228	FALSE	FALSE	chrX_30550000_30750000	NA	NA
ENSG00000198223	CSF2RA	repressed	-0.2187915343781421	-0.2313850547559095	-0.01607666499669592	-0.0524468199196789	-0.09323116280569484	-0.676405197896804	-0.8182389710741261	FALSE	FALSE	chrX_1250000_1350000	NA	NA
ENSG00000102359	SRPX2	repressed	-0.09730646007862284	-0.20809403961273695	-0.5937660645229724	-0.7672646854748756	-0.4736420174891728	-1.0826731177375193	-1.117913058346338	FALSE	FALSE	chrX_100600000_101400000	TAD_UP	1
ENSG00000165376	CLDN2	repressed	0.11413726252087712	-0.19985453464362216	-0.05836628503035286	-0.6611154892585214	-0.6412568200632693	-0.7585254271125992	-1.1869737438958434	FALSE	TRUE	chrX_106800000_108150000	TAD_BALANCED	0.642857142857143
ENSG00000102385	DRP2	repressed	-0.21267591379697484	-0.5355876949758411	-0.5473205848097568	-0.32082414486202576	-0.7247270270677612	-0.5217765529904498	-1.0792621239763565	FALSE	FALSE	chrX_100600000_101400000	TAD_UP	1
ENSG00000175556	LONRF3	repressed	-0.2295196264652627	-0.5495929887969472	-0.6577298191957606	-0.775032412493675	-0.3813616964090744	-0.5669891870197854	-0.903254407035763	FALSE	FALSE	chrX_118800000_119250000	NA	NA
ENSG00000102287	GABRE	repressed	-0.1421084095273434	-0.2378959004745281	-0.8636762380665801	-0.8101324480985589	-0.6439215487199116	-0.6756533258644267	-0.17189056779527104	FALSE	FALSE	chrX_151100000_152950000	NA	NA
ENSG00000232928	DDX3P1	repressed	-0.51464170595323	-0.4760235937387344	-0.4572537267251404	-0.9685137068089534	-1.4671385884837689	-0.1622500568420181	-0.2757137927097269	FALSE	FALSE	chrX_73000000_74600000	NA	NA
ENSG00000216866	RPS2P55	repressed	-0.49505923575067307	-0.5855943191068322	-1.148602988223415	-0.39660284318636024	-0.5348732803112415	-0.4132470168090686	-0.30074735322607155	TRUE	FALSE	chrX_40650000_41250000	TAD_UP	1
ENSG00000275342	PRAG1	repressed	-0.07991841592321876	-0.30482893051775845	-1.0765309663405742	-1.0338962964127554	-0.8999018524686753	-0.731800213610234	-0.689847102608596	TRUE	TRUE	chr8_8200000_8750000	TAD_DOWN	0.285714285714286
ENSG00000120875	DUSP4	repressed	-0.09317901126064906	-0.22132580138336927	-0.8760458172079812	-1.077608395808134	-0.9100933686983332	-0.8377922942076974	-0.932812066810685	TRUE	FALSE	chr8_29300000_30150000	TAD_UP	1
ENSG00000254244	PAICSP4	repressed	0.1299680457891297	-0.4161483803715684	-1.791694748758867	-0.5814607680047134	-1.2680723076909342	-0.3435428942345563	-0.09000444501867431	FALSE	FALSE	chr8_2500000_6400000	NA	NA
ENSG00000285669	NA	repressed	-0.3201783358244316	-0.0389721207225808	-0.6066584743183732	-0.600937483720184	-0.34655566342354976	-0.5138815344445257	-1.006907044150088	FALSE	FALSE	NA	NA	NA
ENSG00000245025	NA	repressed	-0.03301436924751043	0.375392586359569	-0.3318635487197734	-1.3892829492957068	-0.7533767669632407	-1.0440328213096062	-0.7765157760406243	FALSE	FALSE	chr8_22950000_23050000	TAD_UP	1
ENSG00000253802	SIRLNT	repressed	0.08246050618028873	0.23868377093969032	-0.35716239213475953	-0.5374594296258758	-0.6499194245365658	-1.2861447297629762	-1.4083465762078535	FALSE	FALSE	chr8_39850000_41650000	TAD_UP	0.714285714285714
ENSG00000240738	NA	repressed	-0.3972983866779909	-1.0320598814686468	-0.01290917573506083	-0.49793173941642016	-0.8283027205081327	-0.43724578560288807	-0.2958465803297297	FALSE	FALSE	chr8_33600000_37750000	TAD_BALANCED	0.5
ENSG00000157168	NRG1	repressed	-0.10734619663816455	0.2665914903226613	-0.723978322276737	-0.9862330618635782	-1.0425994911239775	-0.9713581891719654	-0.8819317548279597	FALSE	FALSE	chr8_31150000_33600000	TAD_UP	0.75
ENSG00000165061	ZMAT4	repressed	-0.17844657667009384	-0.26527171764774626	-0.11090984716958104	-0.6682986537180916	-0.896964438205341	-1.2315156791486477	-1.3931341382795406	TRUE	FALSE	chr8_39850000_41650000	TAD_UP	0.714285714285714
ENSG00000171033	PKIA	repressed	-0.24185719881765863	-0.02011467548967862	-1.070289204638585	-0.4704850148706935	-1.3611807781268994	-0.3628269726462628	-1.514182718597936	FALSE	FALSE	NA	NA	NA
ENSG00000127589	TUBBP1	repressed	-0.31166138758875084	-0.8347394631633377	-0.6182843254523138	-0.5765637094414328	-0.3536211633126813	-0.2471695675233188	-0.17223689520704127	FALSE	FALSE	chr8_30200000_30650000	NA	NA
ENSG00000177182	CLVS1	repressed	-0.2051870618724014	-0.00197262324598497	-0.502299800638699	-0.2718668443031088	-0.861632209112532	-2.223949860622944	-2.385328005385704	FALSE	FALSE	chr8_60400000_61100000	TAD_DOWN	0
ENSG00000287185	NA	repressed	-0.09287386545634582	0.15439918990291518	-0.5142622043481068	-0.6033135281169844	-0.6218260198109403	-1.0573377126498424	-0.9752675110722534	FALSE	FALSE	chr8_25150000_25500000	TAD_UP	1
ENSG00000164749	HNF4G	repressed	-0.04194347106122167	0.01331581735049322	-0.6716850122663814	-0.9135377956240518	-0.3021487592953655	-0.7724722877233251	-1.0450246218078816	FALSE	FALSE	NA	NA	NA
ENSG00000176731	RBIS	repressed	-0.12760500806261388	0.09866139735541755	-0.8125800164970656	-0.12919055830679427	-0.2504368544447547	-0.19059838137393711	0.0204283871541357	FALSE	FALSE	chr8_85150000_85300000	NA	NA
ENSG00000164823	OSGIN2	repressed	-0.1505298381159966	-0.10367380369868168	-0.8315893963466623	-1.010523135273974	-0.9000192968379108	-0.8406529582194386	-0.7539059136077072	FALSE	TRUE	chr8_89700000_90000000	TAD_DOWN	0
ENSG00000237264	FTH1P11	repressed	-0.32699701251606206	-0.928437864748734	-0.5117495737011633	-0.33779247571542176	-0.4718407079828388	-0.36844923551867553	-0.27034168281992205	FALSE	FALSE	chr8_81500000_81650000	NA	NA
ENSG00000253833	DSTNP3	repressed	-0.8789562604253028	-1.224572371701305	-1.601803094710982	-1.1688266112086456	-1.0057248840542825	-1.1046476208183045	-0.4305827282199365	FALSE	FALSE	chr8_72950000_74400000	TAD_UP	1
ENSG00000104267	CA2	repressed	-0.06368822516242044	-0.11616648404181262	-0.2419519206540813	-1.689077644309581	-1.0138661250880994	-0.701740310318556	-1.700221484793239	FALSE	FALSE	NA	NA	NA
ENSG00000176907	TCIM	repressed	-0.09658877936937033	-0.6304492311202528	-1.2289381688024836	-1.2202924494958425	-1.13264486075661	-0.9142372586987072	-0.8842105503488211	FALSE	FALSE	chr8_39850000_41650000	TAD_UP	0.714285714285714
ENSG00000253227	NA	repressed	-0.04717752865196326	0.19245537087321235	-0.12687989817182663	-0.9258122800092036	-0.5279045698396096	-0.7550520733945766	-0.9225174689439034	FALSE	FALSE	chr8_123800000_124450000	NA	NA
ENSG00000168672	LRATD2	repressed	-0.0417675797484453	-0.5425213861237396	-1.4457889793331893	-2.424467522068652	-1.928254886943012	-1.5359337358212113	-1.6196318178079478	FALSE	FALSE	chr8_125700000_126800000	NA	NA
ENSG00000288611	NPBWR1	repressed	-0.7087178486799973	-0.24252096967435305	-0.992621473193622	-0.8723746392941046	-0.8584939515987354	-1.7543867742667083	-1.9813360592086084	FALSE	FALSE	chr8_52450000_56200000	TAD_UP	1
ENSG00000254023	PKMP4	repressed	-0.9759528072222144	-1.0939489899062749	-2.2377139022660737	-1.711632935547399	-1.2572279607744898	-1.2943782842057452	-1.116067850371972	FALSE	FALSE	NA	NA	NA
ENSG00000029534	ANK1	repressed	-0.3995321180086973	-0.313642205873944	-0.9941550429070104	-1.0031502937762922	-0.767976532300163	-1.1745207929589825	-1.5721312216554104	FALSE	FALSE	chr8_41650000_41950000	NA	NA
ENSG00000285108	NA	repressed	-0.2269351585107102	-0.4822864188482418	-0.1279496676531934	-0.5274594929341855	-1.7714881976386974	-1.7684929532725686	-1.979214460066151	FALSE	FALSE	chr8_126800000_130100000	TAD_UP	0.95
ENSG00000129295	LRRC6	repressed	-0.22116795311279483	-0.411789966454626	-0.06958572148241732	-0.5604073954963653	-0.6239207568091057	-0.8069588972910842	-0.7679569729945303	FALSE	FALSE	NA	NA	NA
ENSG00000177570	SAMD12	repressed	-0.35484948584801035	-0.7866436377290277	-1.573319642329964	-1.2714362358063669	-0.5923041372433365	-1.2932170238385536	-1.394636978224229	FALSE	FALSE	chr8_117300000_118650000	TAD_BALANCED	0.666666666666667
ENSG00000168453	HR	repressed	0.03143670249440584	-0.31861924449622586	-0.5695247661292062	-0.6982893713426367	-0.7573017152108699	-0.864797483186329	-0.7802791630595936	FALSE	TRUE	chr8_22050000_22150000	TAD_DOWN	0
ENSG00000251003	ZFPM2-AS1	repressed	0.03781870296607798	0.01113886858245257	-0.17983556516460808	-0.5068087941026029	-0.44097370447837503	-0.3351758015418589	-0.919667156615064	FALSE	FALSE	chr8_105800000_106650000	TAD_UP	1
ENSG00000178860	MSC	repressed	-0.23924923358167863	-0.6665646385837597	-0.6440256181384445	-1.006863621403707	-1.0581227995996905	-1.069947685768177	-0.8567073923344642	FALSE	FALSE	chr8_69600000_72300000	TAD_UP	0.8
ENSG00000155090	KLF10	repressed	-0.3352862053018001	-1.265771505032728	-0.863268178882679	-0.6622763500099738	-0.5575577944973393	-0.22881000764219056	-0.0619974559635456	FALSE	TRUE	chr8_100150000_103050000	TAD_BALANCED	0.444444444444444
ENSG00000253669	GASAL1	repressed	-0.0898840001091065	-0.4837016871821635	-0.9754373857657176	-0.5489829138207913	-0.623248776482455	-0.7819211536338617	-0.8175222842207324	FALSE	TRUE	chr8_100150000_103050000	TAD_BALANCED	0.444444444444444
ENSG00000253320	MAILR	repressed	-0.17393332062844305	-0.21562828676343537	-0.42431582836770626	-0.7815379933920206	-0.07156563653207959	-0.011471973970368	-0.0799219659356581	FALSE	FALSE	chr8_100150000_103050000	TAD_BALANCED	0.444444444444444
ENSG00000197646	PDCD1LG2	repressed	-0.3265558042864036	-0.4895380084242049	-1.0534773977435572	-0.4070649317182703	-1.5341808206226066	-3.000980770969204	-2.3515862095688296	FALSE	FALSE	chr9_4650000_5650000	TAD_UP	1
ENSG00000176399	DMRTA1	repressed	-0.06469217956230468	-0.22451987913337104	-0.8082528482763759	-0.4978552006180045	-0.44491814627522586	-0.554540984699369	-0.2153243396645617	FALSE	FALSE	chr9_22250000_26850000	NA	NA
ENSG00000120217	CD274	repressed	-0.25177696949381445	-0.7433743108079144	-1.6985777708840428	-1.3828124157408292	-1.611513453443672	-1.0605477635544025	-1.3953803760324588	FALSE	FALSE	chr9_4650000_5650000	TAD_UP	1
ENSG00000171889	MIR31HG	repressed	-0.1413896274796979	-0.16230557503127876	-0.5572400897605772	-0.6651250135924247	-0.4468062511854322	-0.7692037255725489	-0.6483593167523349	TRUE	FALSE	chr9_21200000_21850000	TAD_BALANCED	0.666666666666667
ENSG00000230207	RPL4P5	repressed	-0.11660524318618844	-1.077181820915475	-0.8220878090286234	-0.451782956948115	-0.6397144879932274	-0.6717546886011858	-0.6266507155447292	FALSE	FALSE	chr9_6800000_9250000	NA	NA
ENSG00000136842	TMOD1	repressed	-0.27177223418624513	-0.05059253786650905	-0.2853085864002359	-0.4855382107714112	-0.4444349150708337	-0.920458435419912	-1.177722398069453	FALSE	FALSE	chr9_97400000_97650000	NA	NA
ENSG00000119508	NR4A3	repressed	-0.06224090347646795	-0.5485483892794769	-1.333814253882326	-2.286025303202301	-1.8078699815889068	-2.022928005288452	-1.6564415193705857	FALSE	TRUE	chr9_99150000_100650000	TAD_DOWN	0
ENSG00000179766	ATP8B5P	repressed	-0.9581739817009112	-1.462922993767646	-1.6020622153789976	-2.4717978561738536	-0.7141783033237201	-1.0107800331632733	-0.9627716281889164	FALSE	FALSE	chr9_34650000_35650000	TAD_BALANCED	0.666666666666667
ENSG00000136944	LMX1B	repressed	0.04029866484685773	-0.547336544229416	-0.7320493217216718	-0.4928725421253645	-0.839514114367569	-0.18419144418986316	-0.996643705526292	FALSE	FALSE	chr9_126600000_126700000	NA	NA
ENSG00000106927	AMBP	repressed	-0.1482897979750888	-0.7507750001859207	-0.5456892054053093	-0.37194314456932	-0.6245181310465511	-0.5202685222206365	-1.3568202289839506	FALSE	FALSE	chr9_113650000_114350000	TAD_BALANCED	0.666666666666667
ENSG00000138835	RGS3	repressed	-0.10457799745827302	-0.3442640079319252	-0.5138030245924546	-0.7212236026297048	-0.6645730607697451	-1.1047772588493674	-1.1201561197687355	FALSE	FALSE	chr9_113300000_113450000	NA	NA
ENSG00000234460	NA	repressed	-0.4980808780567456	-0.5189272431332737	-1.1453943803101498	-0.9529448842623224	-1.0890064299093885	-1.9790585442907331	-1.6016010198183657	FALSE	FALSE	chr9_87650000_89350000	TAD_UP	0.888888888888889
ENSG00000056558	TRAF1	repressed	-0.4170202003901268	-0.8083683374817857	-0.9382065357222794	-0.7388717153410553	-0.7406699482401244	-0.857984984192038	-0.6086296247101359	TRUE	FALSE	chr9_120850000_120950000	TAD_UP	1
ENSG00000136881	BAAT	repressed	0.14384224159849263	0.17259100975508718	-0.2487615325264076	-0.8530810825380155	-0.9503657737462806	-1.0697902516325477	-1.0168338463397917	FALSE	FALSE	chr9_101300000_101400000	TAD_UP	1
ENSG00000119125	GDA	repressed	0.0122493736739015	0.07497120094136064	-0.5156479891633323	-0.9834287861415146	-0.5267294551399638	-0.7501015249960623	-0.5995012179305629	FALSE	FALSE	chr9_72050000_72150000	NA	NA
ENSG00000198435	NRARP	repressed	0.01279068019512061	-0.31232355375799187	0.1850021151533222	-0.5921540873908355	-1.0418429346053786	-1.0116948215760049	-0.8106418329733525	FALSE	TRUE	chr9_137250000_137350000	TAD_DOWN	0
ENSG00000188483	IER5L	repressed	-0.24310659100533705	-1.511773332881008	-1.1418756869959188	-1.277811656974844	-1.5253556077998185	-1.1034055526487108	-1.0756505179132358	FALSE	TRUE	chr9_129100000_129650000	TAD_BALANCED	0.363636363636364
ENSG00000233901	LINC01503	repressed	-0.4034048632362438	-0.255991780482819	-0.08438528622459798	-0.7491874069857136	-0.7761656102899988	-0.8618612915249695	-1.0556577932232962	FALSE	TRUE	chr9_129100000_129650000	TAD_BALANCED	0.363636363636364
ENSG00000126882	FAM78A	repressed	-0.38631260273813894	-0.5299664092380075	-1.8221052201673789	-1.5430353887912869	-0.7997576409448098	-0.8627571266086024	-0.9391639273220708	FALSE	FALSE	chr9_131150000_131350000	NA	NA
ENSG00000236095	NA	repressed	-0.1822836229075599	-0.06751360767417885	-0.64465636664066	-0.3193839423129871	-0.7237626937722973	-1.115401025131201	-1.1843042925165503	TRUE	FALSE	chr9_94650000_95150000	TAD_UP	0.833333333333333
ENSG00000283526	PRRT1B	repressed	0.12548773840264457	-0.00402933706256547	-0.286545654366221	-0.9887934660583526	-1.307800628209455	-1.177878679034721	-2.004517142691584	FALSE	TRUE	chr9_131450000_131550000	TAD_DOWN	0
ENSG00000181634	TNFSF15	repressed	-0.6650432041423396	-0.985220907964476	-4.181851426804374	-4.711898331638295	-3.453519576468038	-4.377239313984387	-3.736127829930419	FALSE	TRUE	chr9_114350000_115550000	TAD_BALANCED	0.6
ENSG00000226562	CYP4F26P	repressed	0.4949239194441209	-0.10032116286480317	0.19370773964345023	-0.5645803958044454	-0.31791454394484664	-0.2354953730812536	-0.9371919161188664	FALSE	FALSE	chr9_33500000_33600000	NA	NA
ENSG00000281128	PTENP1-AS	repressed	-0.2912434290386668	-0.23401928171050493	-0.688070816546719	-0.8188737425416148	-0.2666384283946446	-0.6330312608927976	-1.048297364553731	FALSE	FALSE	chr9_33600000_33700000	NA	NA
ENSG00000135047	CTSL	repressed	-0.06382981147371741	0.00431912851837811	-0.08425891116143676	-0.3850368320836594	-0.436569333261726	-0.5656160281836657	-0.7512224514020307	FALSE	FALSE	chr9_87650000_89350000	TAD_UP	0.888888888888889
ENSG00000230074	NA	repressed	0.03121206672468987	-0.8612160940710444	-0.3147136416860745	-0.5458703723047124	-1.0970309193619203	-0.9687009307244164	-0.6401687174392574	FALSE	FALSE	chr9_34650000_35650000	TAD_BALANCED	0.666666666666667
ENSG00000225347	SLC25A5P8	repressed	-0.991256761497166	-1.2103817904433951	-1.1532193943146902	-1.1239059731320495	-1.0146972545666948	-0.5698618475511247	-0.9970642689354212	FALSE	FALSE	chr9_27550000_32350000	NA	NA
ENSG00000223478	NA	repressed	-0.19775257096452645	0.21659635927523693	-0.7799021338989587	-0.392491813442659	-0.1676810425678297	-0.4756725408665888	-0.44710378044296273	FALSE	FALSE	chr9_128650000_128750000	NA	NA
ENSG00000227619	NA	repressed	0.45804357823149133	-0.2225721422018666	-0.12998067791222714	-0.8257558160036925	-0.5835955208387289	-1.1059939195043007	-0.9982653130375828	FALSE	FALSE	chr9_129100000_129650000	TAD_BALANCED	0.363636363636364
ENSG00000184995	IFNE	repressed	0.18943748713595077	-0.1466982810848708	-1.1201106481732186	-1.8897187843413763	-0.7528930668855045	-0.7419503355997741	-0.5869197605537796	FALSE	FALSE	chr9_21200000_21850000	TAD_BALANCED	0.666666666666667
ENSG00000231806	PCAT7	repressed	-0.02882735411034786	-0.34513343467022434	-0.3962789314227986	-0.411809410369981	-0.6985645701258971	-1.078467851093004	-0.4296200322226716	FALSE	FALSE	chr9_94550000_94650000	NA	NA
ENSG00000136883	KIF12	repressed	-0.01120064131496354	-0.3881793954048571	-0.34759360654182636	-0.725571730842285	-0.8200469356976301	-0.8890362868704008	-0.8652723282055377	FALSE	FALSE	chr9_113650000_114350000	TAD_BALANCED	0.666666666666667
ENSG00000137033	IL33	repressed	0.27127285668843465	-0.24867791692352273	-0.6278702289368288	-0.7733814408089129	-1.156119165233626	-1.4040331539123077	-2.0846080757075427	FALSE	FALSE	chr9_6000000_6350000	NA	NA
ENSG00000080298	RFX3	repressed	0.07698475508269992	-0.38578387812505466	-0.4817782953729698	-0.9402934098066084	-0.8338509503818717	-1.1366447983791592	-1.190042610836004	FALSE	FALSE	chr9_3500000_3600000	NA	NA
ENSG00000149050	ZNF214	repressed	-0.21097998281875013	-0.3203290841995709	-1.0924558797146753	-0.4457119228285447	-0.9163320816524496	-0.9086625127700398	-0.7500156578653183	FALSE	FALSE	chr11_4100000_8150000	TAD_DOWN	0
ENSG00000215182	MUC5AC	repressed	-0.06833998498346094	-1.2745961105747352	-0.7981391149045015	-2.281042438478789	-1.5244182069072714	-1.5261560614157617	-2.6032666226209775	FALSE	TRUE	chr11_850000_1650000	TAD_DOWN	0
ENSG00000254780	NA	repressed	-0.8451089921714994	-0.636052400325236	-1.0848858383548696	-1.854970489550677	-0.963939490599814	-2.157305974640108	-2.405867120550719	TRUE	FALSE	chr11_47850000_48150000	TAD_UP	0.9
ENSG00000255433	LINC02735	repressed	0.04913845931079758	0.1736682982070618	-0.30530063125792933	-0.937970906638333	-0.9388263614802432	-2.005035877357539	-1.5862366112493118	FALSE	FALSE	chr11_56800000_57300000	TAD_DOWN	0
ENSG00000224411	HSP90AA2P	repressed	-0.1462570800338364	-0.6820156617516825	-0.8123155986273606	-0.566225547085176	-0.6983606545293798	-0.8502649413772144	-0.5502281501077999	FALSE	FALSE	chr11_27500000_29450000	TAD_UP	0.833333333333333
ENSG00000213445	SIPA1	repressed	-0.13353573655550025	-0.8052312674128772	-0.6765168127974325	-0.49459492042869824	-0.7471012719874429	-0.9852353553165956	-0.653265282033954	FALSE	FALSE	chr11_65600000_66050000	TAD_DOWN	0
ENSG00000251562	MALAT1	repressed	-0.14328174983102257	-1.3130846077388378	-1.2758495903463316	-0.569134233624966	-0.08017798170518116	-0.20256651593397304	0.023272906107698232	TRUE	FALSE	chr11_65350000_65600000	TAD_BALANCED	0.6
ENSG00000178301	AQP11	repressed	-0.34490471172689663	-0.3584568166959827	-0.6509530805371203	-1.0555886558925995	-0.798724061666189	-1.1579375591295804	-0.9892385606217252	FALSE	FALSE	chr11_77200000_77600000	NA	NA
ENSG00000179331	RAB39A	repressed	-0.3967126233373124	-0.21034839958985463	-0.48625875390146567	-0.5432876004426338	-0.7486118403191441	-0.9706112704111404	-1.2386906417373729	FALSE	FALSE	chr11_107550000_108000000	TAD_UP	1
ENSG00000019144	PHLDB1	repressed	0.03524777630222399	-0.16476118501659537	0.05054677480251093	-0.20055848296168072	-0.5011295764117846	-0.6291238251585499	-0.8887506226044785	FALSE	FALSE	chr11_118550000_118650000	NA	NA
ENSG00000255248	MIR100HG	repressed	-0.03467826677252842	0.02409491311186051	-0.6155350500777679	-0.7857886234984173	-0.4513353347377603	-0.8272135786684711	-0.3953302737004576	FALSE	FALSE	chr11_121600000_122600000	TAD_UP	1
ENSG00000062282	DGAT2	repressed	-0.22399216805775615	-0.5173672597400863	-0.05070200825909982	-0.388432311744422	-0.3851768007896159	-0.4633005522195678	-1.0493419685937098	FALSE	FALSE	chr11_75550000_76700000	TAD_BALANCED	0.5
ENSG00000068971	PPP2R5B	repressed	0.00558713016678844	-0.7194957036272269	-0.46103576849077504	-0.9345072105440888	-0.903678135135055	-0.8172480743958748	-0.40441915057740285	FALSE	FALSE	chr11_64750000_65150000	TAD_DOWN	0
ENSG00000121236	TRIM6	repressed	-0.08014902692483307	-0.08968207218244206	-0.5924262531861394	-0.8898497432160422	-0.9208786902821102	-0.9541673416641672	-0.910394720625952	FALSE	FALSE	chr11_4100000_8150000	TAD_DOWN	0
ENSG00000181649	PHLDA2	repressed	-0.09815107013747792	0.01324365099497919	-0.07338230921852554	-0.5414831212917286	-0.4594862999160415	-0.7440284226362727	-0.8463422764350499	FALSE	FALSE	chr11_2150000_3250000	TAD_UP	1
ENSG00000133805	AMPD3	repressed	-0.08150443433522184	-0.19740995739804745	-0.44874597937579624	-0.5175182969608759	-0.5848553433781413	-0.8743030703354012	-0.9864263842978932	TRUE	TRUE	chr11_9500000_10750000	TAD_UP	0.9
ENSG00000255823	MTRNR2L8	repressed	-0.2071482241597965	-0.8023109509913691	-1.0528144954177	-0.596439359819962	-0.29109806676999894	-0.4252916927337227	-0.18449302883003124	FALSE	FALSE	chr11_9500000_10750000	TAD_UP	0.9
ENSG00000175592	FOSL1	repressed	-0.39811043895972	-0.9020607813071204	-1.4469876494677936	-0.9618288080217524	-1.0112088718426608	-0.817922379427685	-0.9290740631187178	FALSE	FALSE	chr11_65600000_66050000	TAD_DOWN	0
ENSG00000174791	RIN1	repressed	-0.34694484191099545	-0.4186470128833501	-0.3927167901844679	-0.32693352867406766	-0.42345342770254	-1.070702075592885	-0.4370752153016154	FALSE	FALSE	chr11_66300000_66400000	NA	NA
ENSG00000134825	TMEM258	repressed	-0.4689167963880261	0.03800762953260362	-0.8857985163124398	-0.4685244908742491	-0.36036397604405673	-0.3786044872573516	-0.14301082332830442	FALSE	FALSE	chr11_61750000_62150000	TAD_UP	1
ENSG00000236287	ZBED5	repressed	-0.03929172573140772	-0.35487127601924034	-0.8423922664866003	-1.0363364500621592	-0.9657768742271357	-0.9512235743678268	-0.7178285886974193	FALSE	FALSE	chr11_10750000_12300000	TAD_BALANCED	0.666666666666667
ENSG00000250041	NA	repressed	-0.15364148614077694	-0.0304629655422035	-0.1310088124380095	-0.9566529742927896	-1.4212775413417809	-2.0520632964380736	-1.6567864139354416	FALSE	TRUE	chr11_10750000_12300000	TAD_BALANCED	0.666666666666667
ENSG00000007372	PAX6	repressed	0.0910067355831458	-0.27732320443930886	-1.7843339255129438	-1.337978420502239	-0.7873010735207236	-1.1047300200913917	-1.391956710427929	FALSE	FALSE	chr11_31050000_32300000	TAD_UP	1
ENSG00000184545	DUSP8	repressed	-0.02651669813977927	-2.30762654603764	-1.7517508994624758	-3.295762958936614	-2.4075320606646016	-1.7815367378733304	-1.7277124259920025	FALSE	TRUE	chr11_850000_1650000	TAD_DOWN	0
ENSG00000174516	PELI3	repressed	0.02072780991612652	-0.34834645072673037	-0.2765676220503999	-0.7836482410859581	-0.5106291626757774	-0.6806292946189024	-0.7676779594076272	FALSE	FALSE	chr11_66400000_66850000	TAD_UP	1
ENSG00000175538	KCNE3	repressed	0.4189043968528166	-0.9146549956694934	-0.8859079782497906	-1.9951257286357424	-3.328515620809994	-0.936275334178624	-1.5851546530650864	FALSE	FALSE	chr11_73950000_74600000	TAD_UP	1
ENSG00000186907	RTN4RL2	repressed	0.198502234686267	-0.05923256057960653	0.17947276614824562	-0.4478851099668145	-0.7054148714699142	-0.5725091963081386	-1.0174076130104932	FALSE	TRUE	chr11_57300000_60800000	TAD_DOWN	0.285714285714286
ENSG00000133794	ARNTL	repressed	-0.18475329241303676	-0.05511869502763089	-0.3698925277813328	-0.5216661889338078	-0.7143816642238522	-0.9561819280384264	-1.0756616959568193	FALSE	FALSE	chr11_13200000_13400000	TAD_UP	1
ENSG00000204381	LAYN	repressed	-0.2360435164392488	-0.13067607388186991	-0.38267513794535063	-0.2335000143690584	-0.40247736269172135	-0.819855574777061	-0.8486070551932862	FALSE	FALSE	chr11_111500000_111850000	TAD_UP	1
ENSG00000189431	RASSF10	repressed	-0.4581169199750294	-1.5352819646872078	-2.988313549229969	-3.430055116138953	-2.8177109706695305	-3.3156584083730185	-3.3687564588653367	FALSE	TRUE	chr11_12950000_13200000	TAD_DOWN	0
ENSG00000171631	P2RY6	repressed	-0.20203312400326268	-0.3242619442498207	-0.5463063907741298	-1.1113910755260676	-1.3335508480999567	-1.6811543546447767	-1.619210568598786	FALSE	FALSE	chr11_72800000_73300000	TAD_UP	1
ENSG00000137501	SYTL2	repressed	-0.06512816359588566	0.3204912623718739	-0.26738220265205737	-0.4881121392484498	-0.7047506744713171	-1.2779504872531091	-1.4671679312521393	FALSE	FALSE	chr11_85550000_87050000	TAD_BALANCED	0.4
ENSG00000254632	NA	repressed	0.34896922684353215	-0.05611894229208284	-0.5249747962496518	-0.8420337286770454	-0.6350468868628305	-0.8727805603381448	-0.9321873059252233	TRUE	FALSE	chr11_76700000_77100000	TAD_UP	1
ENSG00000196954	CASP4	repressed	-0.2282266937771012	-0.6942167859379715	-0.6710535288380185	-0.7274665101068448	-0.831276879731573	-1.0103305181246682	-0.8533138169979864	FALSE	FALSE	NA	NA	NA
ENSG00000110697	PITPNM1	repressed	-0.03642275540255067	-0.5192819141533273	-0.4370942121024181	-0.4079569531021834	-0.6417916942352057	-0.6063201821727315	-0.7888262721816137	FALSE	TRUE	chr11_67500000_67600000	TAD_DOWN	0
ENSG00000166387	PPFIBP2	repressed	-0.01716605243303705	-0.6215738970078573	-0.5288621382078409	-1.3063590784154742	-1.2458276687272654	-1.4467504254888537	-1.4214540893679743	FALSE	FALSE	chr11_4100000_8150000	TAD_DOWN	0
ENSG00000182791	CCDC87	repressed	-0.17586797604282292	-0.6421051530218322	-0.9012885931065728	-1.038407419231289	-1.512344020548887	-0.7668830982882126	-1.0761023803140648	FALSE	FALSE	chr11_66400000_66850000	TAD_UP	1
ENSG00000257043	SRSF3P1	repressed	-0.9016424357736772	-1.5674443892325116	-1.4648326214672407	-1.4000885338358504	-0.7495998525914515	-0.857649355134457	-0.6232387564530975	FALSE	FALSE	chr11_18050000_18850000	TAD_UP	1
ENSG00000064309	CDON	repressed	0.07068764210815726	-0.02935301944245576	-0.22924079761122165	-0.5684265701909257	-0.5242455231376251	-0.7512060566223216	-0.7684292158878553	FALSE	FALSE	chr11_125900000_126200000	NA	NA
ENSG00000052850	ALX4	repressed	0.4434702836692314	-0.0984687971446066	-0.5389394148437849	-1.7934679470697514	-1.78638697387744	-1.5586154439886355	-1.1567195472992369	FALSE	TRUE	chr11_44050000_45850000	TAD_BALANCED	0.333333333333333
ENSG00000019505	SYT13	repressed	-0.3513648273657554	-0.05972245481106238	-0.5422124568381606	-0.5032990945226422	-0.2109282395634572	-0.7810364819766942	-0.7523508915816578	FALSE	FALSE	chr11_44050000_45850000	TAD_BALANCED	0.333333333333333
ENSG00000023171	GRAMD1B	repressed	-0.09587448265546938	-0.08017615676511533	-0.2796927259933805	-0.8240265775304892	-0.6093325422090154	-0.7841415188012468	-0.8768667373705772	FALSE	FALSE	chr11_123300000_123400000	NA	NA
ENSG00000173237	C11orf86	repressed	-0.15701702186613234	-0.7891249975147495	-0.5980061861106817	-0.5115982535234935	-1.1743709802910989	-0.9706807822019152	-1.101491767905324	FALSE	FALSE	chr11_66850000_67050000	TAD_UP	1
ENSG00000107485	GATA3	repressed	-0.4139186555438995	-0.16525319513820322	-0.8911641100086556	-0.32459499577887135	0.19871399225028671	-0.06595397189461748	-0.04392475783505713	FALSE	FALSE	chr10_7500000_9300000	TAD_UP	1
ENSG00000223784	LINP1	repressed	-0.05069812288411786	-0.01370028258384776	-0.1788265512504894	-0.35162426745684894	-0.37458923103293373	-0.6461854585066426	-0.8243789431075915	FALSE	FALSE	chr10_6400000_7500000	TAD_UP	1
ENSG00000187134	AKR1C1	repressed	-0.3553272474926552	-0.11729458683881322	-0.6614913343976007	-0.7407245856647182	-0.3791560152885347	-0.8189227439678631	-0.795980782451565	FALSE	FALSE	chr10_4800000_5900000	TAD_UP	0.888888888888889
ENSG00000151655	ITIH2	repressed	-0.03711456725426552	-0.1807545347110062	-0.31480463796262154	-0.8300800255909867	-0.25592946241815007	-1.325263599463088	-0.4760520375807303	TRUE	FALSE	chr10_7500000_9300000	TAD_UP	1
ENSG00000231298	MANCR	repressed	-0.15775672642079783	0.28170178549254965	-0.26612535254891767	-0.3642077137206353	-0.5020304587822157	-1.111042485705988	-1.6508056111154237	TRUE	FALSE	chr10_3150000_4800000	TAD_UP	1
ENSG00000151474	FRMD4A	repressed	0.0339284267774432	-0.22970176960127137	-0.5393235224283289	-0.5676183162998796	-0.82251446387318	-0.7339498899932739	-0.7109107020467091	FALSE	FALSE	chr10_13150000_15400000	TAD_UP	0.833333333333333
ENSG00000215267	AKR1C7P	repressed	-0.03168692960468502	0.00923253906379753	-0.049797600166441	-0.7451219681442257	-0.5480413812854442	-0.8230658307963888	-0.43656267468812504	TRUE	TRUE	chr10_4800000_5900000	TAD_UP	0.888888888888889
ENSG00000120549	KIAA1217	repressed	-0.06304492546855853	-0.1254582959419543	-0.0010241297249578	-1.1289408446211004	-1.3968883630066014	-1.6950551126609892	-1.4263306247238556	FALSE	FALSE	chr10_23100000_24600000	NA	NA
ENSG00000165443	PHYHIPL	repressed	0.20882750636218445	-0.1010460227550043	-0.13930169094590883	-1.377064082071256	-1.078644668597109	-0.665877444221378	-0.9384044518698228	FALSE	FALSE	chr10_58150000_60100000	TAD_UP	1
ENSG00000229932	YWHAZP3	repressed	-0.29913014225706536	-0.8871801760311883	-0.8743956001808927	-0.6851873094586155	-0.5896136028910388	-0.5852515729772727	-0.4082699857537628	FALSE	FALSE	chr10_23100000_24600000	NA	NA
ENSG00000152804	HHEX	repressed	-0.19432661408679353	0.04996275212935658	-0.08077430413941346	-0.7664227863278991	-0.6356728046068566	-0.33805163724096715	0.02283878030199761	FALSE	FALSE	chr10_92600000_92850000	TAD_UP	1
ENSG00000138134	STAMBPL1	repressed	-0.17346781693900704	0.21660734368102855	-0.3680792645743912	-0.6740347586712198	-0.7124896133821506	-0.8894244920180804	-0.8918264511747137	FALSE	FALSE	chr10_88800000_89000000	TAD_UP	1
ENSG00000095596	CYP26A1	repressed	0.07691117389039893	-0.2739301834536692	-1.1379974907776869	-1.3387090812172024	-1.170678636298457	-2.4718603023004087	-1.4893620037679345	FALSE	FALSE	chr10_93000000_93350000	NA	NA
ENSG00000107957	SH3PXD2A	repressed	-0.06955347443703358	-0.2747611553244975	-0.4969052545711189	-1.4343533718474066	-1.5134073873437006	-1.6256711162153048	-1.9417240799678683	FALSE	FALSE	chr10_103700000_103900000	NA	NA
ENSG00000182022	CHST15	repressed	-0.13992340418722135	-0.23488903938781863	-0.35873143780181027	-0.6358037851164958	-0.337676514112708	-0.6432597327482542	-0.7884350744559155	FALSE	FALSE	chr10_119900000_132150000	TAD_UP	0.785714285714286
ENSG00000203780	FANK1	repressed	0.11235737454488566	-0.3177380225734585	-0.8577481196376466	-0.8133364743985332	-0.6542494356355093	-1.541222320802196	-1.2645443657773798	FALSE	FALSE	chr10_119900000_132150000	TAD_UP	0.785714285714286
ENSG00000188385	JAKMIP3	repressed	-0.01272997971660822	-0.03937183224365766	-0.35813202812781214	-0.7708442605018454	-0.8869820645742359	-1.276079955628782	-1.298792160774448	FALSE	FALSE	chr10_119900000_132150000	TAD_UP	0.785714285714286
ENSG00000077150	NFKB2	repressed	-0.02703395200866401	-0.2504105044701538	-0.6262457199063971	-0.9353185289797474	-1.3578434149260743	-1.787319441105063	-1.6529030673271634	FALSE	TRUE	chr10_102100000_102650000	TAD_BALANCED	0.333333333333333
ENSG00000138311	ZNF365	repressed	-0.14789389676126066	0.07404618106392452	-0.2677778532340515	-0.6893972967681219	-0.3515633280224493	-0.9019056201335878	-1.263616738890896	FALSE	FALSE	chr10_62300000_63150000	NA	NA
ENSG00000230109	LINC02643	repressed	-0.12400020392451998	-0.3860714024069004	-0.8240882113514334	-1.4949372425172731	-1.467550551629044	-2.3179079528229303	-2.407252019936006	FALSE	FALSE	chr10_20800000_23100000	TAD_UP	0.857142857142857
ENSG00000204682	MIR1915HG	repressed	-0.21090165563913316	0.00374875138083731	-0.32304683591595323	-0.4944382650652326	-0.5592592434945003	-0.7647638949384011	-0.6808497175023857	FALSE	FALSE	chr10_20800000_23100000	TAD_UP	0.857142857142857
ENSG00000180592	SKIDA1	repressed	-0.2851231417942636	-0.4947271506594776	-0.8787850883805951	-0.8771498887639253	-1.0515959650504911	-1.215963046880056	-0.969418197428148	FALSE	FALSE	chr10_20800000_23100000	TAD_UP	0.857142857142857
ENSG00000283709	FAM238C	repressed	0.15378234958923315	-0.9181583741936562	-0.4507523236874241	-2.2345586636712116	-0.8013755051885985	-1.1306919314146533	-0.685354886461774	FALSE	FALSE	chr10_26900000_27000000	NA	NA
ENSG00000242147	LASTR	repressed	-0.33412508479119424	-0.1358400906652414	-0.6181254333436872	-0.8443888359038716	-0.9985369828463267	-1.590400373458062	-1.261746140950834	TRUE	FALSE	chr10_4800000_5900000	TAD_UP	0.888888888888889
ENSG00000148842	CNNM2	repressed	-0.0124231304064575	-0.27983667165972714	-0.3279747671456429	-0.7947417203267165	-0.6870561912951926	-0.9919632684231244	-1.026515490715689	FALSE	TRUE	chr10_102650000_103600000	TAD_BALANCED	0.5
ENSG00000107968	MAP3K8	repressed	-0.2821634359478968	-0.8386721408839306	-1.4393865885536348	-1.443102063957471	-1.3360150130702042	-1.1956524592094315	-0.792007241335986	FALSE	TRUE	chr10_30350000_30650000	TAD_DOWN	0
ENSG00000273143	DUSP5-DT	repressed	-0.37566861792355255	-0.2629279661846406	-0.361530853098964	-0.8492167565219974	-0.47629919207289584	-1.2812380464058084	-0.5609182617206403	TRUE	FALSE	chr10_110300000_110600000	TAD_UP	1
ENSG00000156510	HKDC1	repressed	0.0461345231391064	-0.20059656626071184	0.04941725127952774	-0.23023932001330555	-0.4516515211251566	-0.5927309024295458	-0.7853175229891505	FALSE	FALSE	chr10_69200000_69400000	TAD_UP	1
ENSG00000119922	IFIT2	repressed	0.03770209238440712	-0.4688153910253777	-0.8752147260554933	-0.776805229993107	-1.0316991612924236	-1.1618498888156004	-1.440019111585905	FALSE	FALSE	chr10_89250000_89400000	TAD_BALANCED	0.5
ENSG00000095739	BAMBI	repressed	-0.09662448793335836	-0.15752147917260068	-0.7727372547596463	-1.375720822956992	-1.0283238781183217	-1.0699320609076055	-1.050711393052186	TRUE	FALSE	chr10_28600000_29450000	TAD_BALANCED	0.5
ENSG00000177283	FZD8	repressed	-0.02977134285082644	-0.6861209705502896	-1.360085660893553	-1.59154234239695	-1.6144340866869689	-1.528370858837088	-1.9108450106518744	FALSE	FALSE	chr10_35100000_38450000	TAD_UP	1
ENSG00000171798	KNDC1	repressed	0.12462325576494657	-0.6517189189391422	-0.5656473738628657	-0.5491115656809952	-0.7180265544330537	-0.9957831974423408	-0.8972764202532748	FALSE	FALSE	chr10_132150000_133300000	TAD_UP	1
ENSG00000213606	AKR1B10P1	repressed	-0.3253448599238013	-0.17485128293486069	-0.7726035874058437	-0.9189035304455846	-0.4530202562685337	-0.5101277955178852	-0.6059231265008662	FALSE	FALSE	chr10_67750000_68350000	TAD_UP	1
ENSG00000256238	SUPT16HP1	repressed	-0.5156843928951986	-0.6034431967954058	-1.5718063706843863	-0.6971824437783196	-0.6758712702503162	-0.7049389195870245	-0.41069168295691855	FALSE	FALSE	NA	NA	NA
ENSG00000256356	HSPA8P5	repressed	-0.2479730163988378	-1.2075842615446986	-1.2092470114227163	-0.9895838103427482	-0.9764617956337764	-1.0096912769212092	-0.8884752006265748	FALSE	FALSE	chr12_1800000_6300000	TAD_BALANCED	0.6
ENSG00000134533	RERG	repressed	-0.7451466645547353	-0.077188177387619	-0.9572046703044532	-0.7475167987802018	-0.6503660538213046	-1.4195718552483718	-1.697068045865233	FALSE	FALSE	NA	NA	NA
ENSG00000179715	PCED1B	repressed	-0.13115493397103783	-0.20288693724777537	-0.2948333255333203	-1.113011985417945	-1.247006181639296	-1.3456435770013098	-1.3840554064385453	TRUE	FALSE	chr12_45950000_47700000	TAD_UP	0.916666666666667
ENSG00000177875	CCDC184	repressed	0.243722981277686	-0.39695315396842834	-0.6022749160204752	-1.1095210506923168	-0.6082277242149101	-0.581852251426621	-1.0481934103715649	FALSE	FALSE	chr12_48000000_48650000	TAD_DOWN	0
ENSG00000151229	SLC2A13	repressed	-0.28657334479480956	-0.00829637745894915	-0.36564104443255463	-0.6950119407165255	-0.37791364801859184	-0.7684980021978014	-0.6713096973369042	FALSE	FALSE	NA	NA	NA
ENSG00000243517	NA	repressed	-0.6661282491589428	-1.27145746597952	-1.8161456165544816	-1.178871336301804	-0.7098731259447162	-0.8525457718248688	-0.9600931288729244	TRUE	FALSE	chr12_31250000_32750000	TAD_UP	0.944444444444444
ENSG00000067715	SYT1	repressed	-0.14921311774473825	0.10372231283759256	-0.24256945601526475	-0.4084409747854392	-0.2074367586231688	-0.7713046979776609	-0.8721313618948384	FALSE	FALSE	NA	NA	NA
ENSG00000067798	NAV3	repressed	-0.22479390112399017	0.2103053791961734	-0.5182395896165221	-2.1894788980729003	-2.184900943202407	-2.520938031094346	-2.1622029534381713	FALSE	FALSE	NA	NA	NA
ENSG00000171310	CHST11	repressed	-0.02636832404824342	0.09746354045217244	-0.32485207895700535	-0.9601350682613043	-0.9149105880803764	-1.3678596608614202	-1.220872400433525	FALSE	FALSE	chr12_103850000_105150000	TAD_UP	0.75
ENSG00000257790	EIF4A1P4	repressed	-0.5946105941136439	-1.2014985111469303	-1.9059357446698877	-1.3116282766673326	-1.0645049819621353	-0.6812391223977564	-0.39175568923211296	FALSE	FALSE	chr12_53050000_53200000	TAD_UP	1
ENSG00000135519	KCNH3	repressed	-0.12824203268134435	-0.17068167012418323	-0.17903584800987407	-0.2366565661904949	-0.462072891830951	-0.6609861593019174	-0.8349292457725378	TRUE	FALSE	chr12_49250000_49600000	TAD_BALANCED	0.6
ENSG00000197757	HOXC6	repressed	-0.2312992337201662	-0.3700423057235585	-0.7829618982459116	-0.3322337441681678	-0.561483295108641	-0.5336027459553454	-0.5079132833695508	TRUE	FALSE	chr12_53700000_54250000	TAD_UP	1
ENSG00000167767	KRT80	repressed	-0.07768423736278893	-0.22989485039959345	-0.5100952721459358	-0.7334427974120512	-0.984174892160699	-0.99064213209284	-1.111050932656943	FALSE	TRUE	chr12_52000000_53050000	TAD_UP	0.75
ENSG00000281344	HELLPAR	repressed	0.3027359867495032	-0.3284275252889703	-0.1933284946817007	-1.0803556516065311	-0.6183024767515709	-0.3855312208390781	-0.3661080864337393	FALSE	FALSE	chr12_101350000_103750000	TAD_UP	1
ENSG00000186076	NA	repressed	-0.5268537925340264	-0.5085347538691064	-1.5715396948273073	-0.7458776579824757	-1.048012402851764	-0.4461720972966114	-0.484689322818491	FALSE	FALSE	chr12_93450000_95550000	TAD_UP	0.888888888888889
ENSG00000171435	KSR2	repressed	-0.3057548166194181	-0.03713360148974989	0.3256836233086907	-0.1493017519121414	-0.06838899848405791	-0.2745062632170281	-0.8181093269597836	FALSE	FALSE	chr12_117900000_118050000	NA	NA
ENSG00000255642	PABPC1P4	repressed	-0.5593749088329917	-0.7454323276287251	-0.9473475213085848	-0.94162544545672	-0.7477418601613947	-0.41842658074020134	-0.27784911735944345	FALSE	FALSE	chr12_63800000_64300000	TAD_UP	1
ENSG00000196668	LINC00173	repressed	-0.24692806586976981	-0.3007886798798365	-0.7614185330884381	-1.700098222282164	-1.037174382895787	-1.6721767369100802	-1.2923582350984983	FALSE	TRUE	chr12_113150000_117200000	TAD_UP	0.875
ENSG00000136014	USP44	repressed	-0.16941766168343003	-0.715198804845955	-0.41589997465682355	-1.5387848852797652	-0.9806841932961196	-1.158618140650672	-1.1325772172325002	FALSE	FALSE	chr12_95550000_95850000	NA	NA
ENSG00000274964	NA	repressed	0.07147635881943495	-0.2302559717519257	-0.862696807396234	-0.9730809248201208	-0.508792504062738	-0.878580905845029	-0.712383486011507	FALSE	FALSE	chr12_31250000_32750000	TAD_UP	0.944444444444444
ENSG00000166046	TCP11L2	repressed	0.15752603451046446	-0.18457486515762264	-0.4663006460524755	-1.1436289098674424	-1.0228850438916144	-1.0099085589941044	-1.095251154760948	FALSE	FALSE	chr12_106250000_106350000	NA	NA
ENSG00000136048	DRAM1	repressed	-0.2484012342186997	-0.18174026405141452	-0.7232232886583814	-0.51775452304472	-0.6109547862491903	-1.0846893330762384	-1.112360859751898	FALSE	FALSE	chr12_101350000_103750000	TAD_UP	1
ENSG00000139725	RHOF	repressed	-0.05752127546759501	-0.35323258992235407	-0.4424503886546348	-0.7013115922963616	-0.7407754801095643	-0.8248862238304359	-0.8181455023740047	FALSE	FALSE	chr12_121800000_121900000	NA	NA
ENSG00000258343	NA	repressed	-0.8482996619220293	-0.42814301746818767	-1.0301818287191598	-1.0913103561003574	-0.7500213844505712	-1.1642955179721826	-0.6435638755448034	FALSE	FALSE	chr12_95850000_96000000	TAD_UP	1
ENSG00000232888	RPS11P5	repressed	-0.48693257040500215	-0.9214931000648512	-0.6898010046376967	-0.41878688637807154	-0.8910180297292356	-0.4423063170357545	-0.5845697962784555	FALSE	FALSE	chr12_132800000_133200000	TAD_DOWN	0
ENSG00000258181	NA	repressed	-0.19407176794219505	-0.2051655349868741	-0.3891001393693037	-0.34121101570133366	-1.1848719307536928	-0.8572152684802598	-0.799398274224796	TRUE	FALSE	chr12_45950000_47700000	TAD_UP	0.916666666666667
ENSG00000139187	KLRG1	repressed	-0.03834376975165032	-0.2800192182118514	-0.7699455781105021	-0.7639720839549438	-0.6836626238869155	-0.5495753377521932	-0.6940439475797592	FALSE	FALSE	chr12_8500000_9100000	TAD_UP	1
ENSG00000287200	NA	repressed	0.12454584304628688	-0.6789656545537704	-0.6428166619276624	-1.6015539514873338	-1.458976602325737	-0.9876582360032594	-1.15124855484655	FALSE	TRUE	chr12_57200000_57500000	TAD_DOWN	0
ENSG00000111087	GLI1	repressed	0.10780098447166886	-0.2318042034534393	-0.928904775631672	-1.7243502162470556	-1.587609749582729	-1.4630336447698884	-1.436194030101103	FALSE	TRUE	chr12_57200000_57500000	TAD_DOWN	0
ENSG00000250510	GPR162	repressed	-0.1806587904195246	-1.0527980431013977	-0.5148932515132284	-0.7276596047028523	-0.8589933660825676	-1.9886400267221336	-1.96534223714406	FALSE	FALSE	chr12_6550000_6850000	TAD_DOWN	0
ENSG00000111674	ENO2	repressed	-0.05335796933792974	-0.19838678488208267	-0.3146979445250464	-0.5322822157211491	-0.6162791244025604	-0.8189951553804197	-0.927741766120828	FALSE	FALSE	chr12_6850000_6950000	TAD_DOWN	0
ENSG00000152137	HSPB8	repressed	0.06978617516519171	0.04515529382215487	-0.5315839379516604	-0.4090252547824425	-0.39979339018990184	-0.5946064837467759	-0.8002275402770368	FALSE	FALSE	chr12_118400000_119700000	NA	NA
ENSG00000087494	PTHLH	repressed	-0.25132476668947795	-0.1614970129566724	-1.2677592325737517	-1.782523884680261	-1.576910602610648	-1.774184613543798	-1.945967156569957	FALSE	TRUE	chr12_27700000_29000000	TAD_BALANCED	0.666666666666667
ENSG00000180861	LINC01559	repressed	-0.8237709479020042	-0.4265921701362957	-0.6786599095673612	-2.5439141459368657	-0.9650021326402524	-1.9124640723259456	-2.4655047973972635	FALSE	FALSE	chr12_12750000_14200000	TAD_UP	0.857142857142857
ENSG00000161642	ZNF385A	repressed	-0.15129939639940931	-0.26446926783694025	-0.392295680502872	-0.7896438012826881	-0.38766817301793666	-0.630538287749069	-0.5506252800666145	FALSE	FALSE	chr12_54350000_54450000	TAD_UP	1
ENSG00000213942	NA	repressed	-1.0133254311286732	-1.3914433646693547	-0.8179288864017928	-1.284687214258016	-0.3637929207905465	-0.864286258437502	-0.6602458915048572	FALSE	FALSE	chr12_6300000_6550000	TAD_UP	1
ENSG00000198431	TXNRD1	repressed	0.02705653675486606	0.07541967114497103	-0.04458426864039072	-0.4190025115342078	-0.7044255219057134	-0.7834901604435527	-0.7331057289440758	FALSE	FALSE	chr12_103850000_105150000	TAD_UP	0.75
ENSG00000177169	ULK1	repressed	0.05078904250547225	-5.720418695442522e-4	-0.06468311694811338	-0.3240451692156806	-0.4749279876153413	-0.6244096502898756	-0.7926236262071106	FALSE	FALSE	chr12_130750000_132100000	TAD_DOWN	0
ENSG00000188906	LRRK2	repressed	-0.14699692357458913	0.06501669440427293	-0.33695173871061795	-0.8122118645126641	-0.5118512533447964	-0.8166075664068934	-0.8281037064245639	FALSE	FALSE	NA	NA	NA
ENSG00000172602	RND1	repressed	-0.3727581004854284	-1.4130543470436805	-1.8353952255849637	-2.814479293430474	-2.276027486588421	-2.7164875561061144	-2.2439897320164843	FALSE	TRUE	chr12_48850000_48950000	TAD_DOWN	0
ENSG00000074590	NUAK1	repressed	-0.3015859913118156	-0.16063663713018772	-1.1087732434440474	-0.9760608161783568	-0.9111979742144076	-1.100608789329773	-1.0070875185882997	FALSE	TRUE	chr12_105400000_106250000	TAD_DOWN	0
ENSG00000139289	PHLDA1	repressed	-0.00758941403279338	-0.116121665658803	-1.1544566892915282	-1.1736671694036724	-0.9389509108668748	-0.9192254633458418	-0.923647049323762	FALSE	FALSE	chr12_75350000_76600000	TAD_UP	1
ENSG00000178878	APOLD1	repressed	-0.24354953502525728	-0.14472119633707245	-0.4447672537338128	-1.141648086442671	-0.8234080828310016	-0.389273258981608	-1.2689810842284133	FALSE	FALSE	chr12_12350000_12750000	TAD_UP	1
ENSG00000241388	HNF1A-AS1	repressed	-0.03533844516552482	-1.1583928511898718	-0.6400894378531407	-0.978853807104186	-0.7540407391659961	-0.6135738587841963	-0.7087243054906356	FALSE	FALSE	chr12_120300000_121300000	TAD_DOWN	0
ENSG00000135100	HNF1A	repressed	-0.258728490693951	-0.8556577751430074	-0.2368585728572155	-0.7881320898445183	-0.7649785207353871	-0.6632439970097824	-0.7142208130558747	FALSE	FALSE	chr12_120300000_121300000	TAD_DOWN	0
ENSG00000065361	ERBB3	repressed	-7.580481082506507e-4	-0.6055044318124142	-0.13070462451291523	-0.8550197774363074	-0.4576974494342226	-0.4000905111040279	-0.7882263975435484	FALSE	FALSE	chr12_55700000_56100000	TAD_UP	1
ENSG00000013588	GPRC5A	repressed	-0.04822792807934278	-0.08592817388204083	-0.3491917599911758	-0.7728301775295419	-0.6037389745944521	-0.7193793893208098	-0.5413153320518752	TRUE	TRUE	chr12_12750000_14200000	TAD_UP	0.857142857142857
ENSG00000247498	GPRC5D-AS1	repressed	-0.09798285507776888	-0.28014604389034076	-0.2639220824904584	-0.8336518806527217	-0.3760500950855677	-0.3591234260188949	-0.15374045820017537	FALSE	FALSE	chr12_12750000_14200000	TAD_UP	0.857142857142857
ENSG00000135148	TRAFD1	repressed	-0.2903451536421109	-0.31758152104309584	-0.7556779714022863	-0.9691933563186016	-0.9192526801596284	-1.0761086708019163	-0.8401851929652829	FALSE	FALSE	chr12_111800000_112450000	NA	NA
ENSG00000111181	SLC6A12	repressed	-1.2277629387697322	-0.6525202044774923	-1.481983702402616	-0.92557668527432	-0.6899881789058108	-1.320437160661826	-1.629542319103033	FALSE	FALSE	chr12_50000_250000	NA	NA
ENSG00000166153	DEPDC4	repressed	-0.07808601690238601	-0.4813930743280081	-1.100548564104747	-0.814894290916152	-0.7056570142354662	-0.4708148186410344	-0.4329991599353695	FALSE	FALSE	chr12_100200000_100650000	TAD_UP	1
ENSG00000139737	SLAIN1	repressed	0.10088624191255872	-0.5474036254661884	-0.5609209349621409	-1.530119378197529	-0.5461591458639694	-0.707194455304989	-1.039215219374707	FALSE	FALSE	chr13_77600000_77750000	NA	NA
ENSG00000182957	SPATA13	repressed	-0.08732128950436734	0.09744682944465773	0.03199443652992765	-0.35731703326405356	-0.2881561956538959	-0.5847348356632136	-0.9573584024163552	FALSE	FALSE	chr13_23900000_24000000	NA	NA
ENSG00000125285	SOX21	repressed	0.18656921443875393	-0.22457827763942811	-1.3571574035027263	-2.4205383000453873	-2.5031821776613783	-1.9414160787140216	-1.88293469758449	FALSE	FALSE	chr13_94650000_95200000	TAD_UP	1
ENSG00000184564	SLITRK6	repressed	-0.11550114271706928	-0.25903103387433624	-1.0624638147182688	-1.8839500207930175	-1.3729024671039936	-1.8081785511066797	-1.8867218568690232	FALSE	FALSE	chr13_84850000_85850000	NA	NA
ENSG00000227640	SOX21-AS1	repressed	0.2926865103652059	0.33004605891443334	-0.1784460966290143	-1.7768307077840726	-1.6841525908365544	-1.2072629770046472	-0.9208066346874656	FALSE	FALSE	chr13_94650000_95200000	TAD_UP	1
ENSG00000043355	ZIC2	repressed	-0.3091279777519807	-0.5379555502753788	-0.6785415620730604	-1.1822094153599758	-1.0226757243514208	-0.9621840709892396	-1.0352613038477154	FALSE	FALSE	chr13_99550000_100600000	NA	NA
ENSG00000230535	BASP1P1	repressed	-0.3347561205194131	-1.2980726899086374	-1.65622604935514	-0.9004578196769569	-1.1971871229117974	-1.0569612699260102	-1.505936932381339	FALSE	FALSE	chr13_21550000_23350000	NA	NA
ENSG00000150510	FAM124A	repressed	-0.09214932696321596	0.0933203663916883	-0.15880786352927584	-0.1040800152449725	-0.07002486109958936	-0.9647921566044794	-0.29239740363341576	FALSE	FALSE	chr13_51150000_51300000	NA	NA
ENSG00000230243	FKBP1AP3	repressed	-0.7095932809892163	-1.5974546510713563	-1.8098690016041468	-1.148680775069245	-0.9556094920627316	-0.3882311103756494	-0.3389915133317739	FALSE	FALSE	chr13_46450000_46800000	TAD_UP	1
ENSG00000139679	LPAR6	repressed	-0.03021878900320875	-0.14530654881289462	-0.7390118415053558	-0.9550682715900506	-0.6123682494467092	-0.8299356446253238	-0.6318441446243092	FALSE	FALSE	chr13_48300000_48600000	NA	NA
ENSG00000122026	RPL21	repressed	-0.06020242868246987	0.37943649770296134	-0.8632563378393675	-0.13749496146355403	-0.24653059911387912	-0.24129107638197003	-0.17829820873894023	FALSE	FALSE	chr13_26950000_27350000	NA	NA
ENSG00000136114	THSD1	repressed	0.01035606260634258	-0.3063102097095773	-1.0182692675425953	-0.882357521643426	-1.0258770508865709	-1.0409936644032685	-0.9284388835570844	FALSE	FALSE	chr13_52250000_52550000	NA	NA
ENSG00000139910	NOVA1	repressed	0.10004242953297524	-0.02552245058299951	-0.34442265111549125	-0.7851970250469325	-0.6400227304335063	-0.8840556505285481	-0.732183358638864	FALSE	FALSE	chr14_25200000_28700000	TAD_UP	1
ENSG00000258655	ARHGAP5-AS1	repressed	-0.2785799261758621	-0.0672657705589571	-0.5561843796669858	-0.7976281491615675	-0.7115919911126332	-0.9574266326791582	-0.9240465978153972	FALSE	FALSE	chr14_31400000_32550000	TAD_UP	0.75
ENSG00000129514	FOXA1	repressed	-0.06926533672303936	-0.14986794768172343	-0.5343283569359715	-1.135406124097902	-0.7560389409101518	-0.939372495952835	-0.7651535888291345	FALSE	FALSE	chr14_37200000_37900000	NA	NA
ENSG00000129493	HEATR5A	repressed	-0.1493360768215615	0.10504585420462768	-0.3962670808044728	-0.7365549998402382	-0.50820961677393806	-0.9621901416062631	-0.9555966408286716	FALSE	FALSE	chr14_31400000_32550000	TAD_UP	0.75
ENSG00000258559	NA	repressed	-0.32191127467629194	-0.36733604292566346	-1.3346195821074591	-0.9622240943287128	-0.19067413632618097	-0.3067960018377544	-0.2820553687804059	FALSE	FALSE	chr14_74250000_74350000	NA	NA
ENSG00000129521	EGLN3	repressed	0.04894219914406521	0.00762643689786287	0.5932624514496181	0.00952612769106643	-0.1848218266945116	-0.44935477180462247	-0.7548115652755828	TRUE	FALSE	chr14_34350000_34550000	TAD_UP	1
ENSG00000125378	BMP4	repressed	-0.26812631207577775	-0.6689199175803636	-0.8109029779636644	-0.4739346013616197	-0.03654927707502416	0.00768842188736207	-0.05073562037285661	FALSE	FALSE	chr14_53250000_54400000	TAD_UP	1
ENSG00000139946	PELI2	repressed	-0.00658041586366624	0.0710119314741594	-0.1742388712213988	-0.7588126237761513	-0.7347365561880521	-0.7843082262800692	-1.0560209790925854	FALSE	FALSE	chr14_55400000_56500000	TAD_UP	1
ENSG00000080823	MOK	repressed	-0.13733073099320833	-0.24941136180728807	-0.27447989518211025	-0.28606325605239197	-0.6167846701969911	-0.7600760324590469	-0.7672157088228422	FALSE	FALSE	chr14_102300000_102400000	NA	NA
ENSG00000100739	BDKRB1	repressed	0.437839776722861	-0.6093558684201744	-1.856848697340937	-2.3157170671175873	-2.1304373958460543	-1.381215535145073	-3.2897861198422027	FALSE	FALSE	chr14_96200000_96300000	TAD_DOWN	0
ENSG00000258498	DIO3OS	repressed	-0.6697978355743222	-1.464331672429225	-0.8544889456512809	-0.8295368728801974	-1.864077382016604	-1.4341573158599057	-1.2531654688434406	FALSE	TRUE	chr14_100300000_101750000	TAD_DOWN	0
ENSG00000184986	TMEM121	repressed	0.13312227592097048	-0.792063999192716	-0.3769543238763772	-0.4146852027556519	-0.34813092880302254	-0.5169612083557666	-0.947566828179742	FALSE	FALSE	chr14_105450000_105550000	TAD_DOWN	0
ENSG00000239043	SNORD127	repressed	-0.7078852657955081	-2.065864992447662	-2.501492783824101	-1.1676047675750345	-0.5638689088545175	-0.0967663210007824	-0.10280356300039932	FALSE	FALSE	chr14_44900000_45250000	NA	NA
ENSG00000278771	RN7SL3	repressed	-0.38127595966938777	-1.2850757644171602	-0.6496012233199349	-0.975176699945252	-0.909404745553773	-0.5949874948127236	-0.491272883858209	TRUE	FALSE	chr14_49850000_50150000	TAD_UP	1
ENSG00000129474	AJUBA	repressed	-0.18455076057276185	-0.4119973596395831	-0.8339691194258905	-0.3269959855989655	-0.4923491169718805	-0.42500154673262297	-0.35344589863739095	FALSE	TRUE	chr14_22950000_23100000	TAD_DOWN	0
ENSG00000258457	NA	repressed	0.01537140762154321	-0.7536961058449456	-0.09517418536729542	-0.6953380471745383	-0.5648548985807131	-0.8094526782726931	-0.9181844791322814	FALSE	TRUE	chr14_22950000_23100000	TAD_DOWN	0
ENSG00000136367	ZFHX2	repressed	-0.11113470198531147	-0.8876579279965643	-0.9161364453615324	-1.3157875825907028	-0.5915721387394004	-1.1640852601760607	-0.8947490536695313	FALSE	FALSE	chr14_23450000_23600000	NA	NA
ENSG00000213741	RPS29	repressed	-0.08016466267485563	-0.2747222107218322	-0.8786463613193711	-0.4302424835754492	-0.4719849024978148	-0.3685243994194591	-0.17776191027844301	FALSE	FALSE	chr14_49550000_49650000	TAD_UP	1
ENSG00000211448	DIO2	repressed	-0.08111950717505882	0.1597453139806784	-0.5454734102656409	-1.2557245930948169	-1.7412686565325497	-2.188891540146971	-2.175920948556542	FALSE	FALSE	chr14_78850000_81250000	TAD_UP	1
ENSG00000165801	ARHGEF40	repressed	0.1352196289260098	-0.38486199605516846	-0.5108347842545757	-0.5459760420290676	-0.770913126143312	-0.7805697145696283	-0.9370629259120332	FALSE	FALSE	chr14_21000000_21100000	NA	NA
ENSG00000165521	EML5	repressed	0.03585969579152259	0.06457671816579903	-0.18288218762965672	-0.682532109253135	-0.5453361265560346	-1.1644441772095748	-0.9038389276303794	FALSE	FALSE	chr14_88550000_90250000	TAD_BALANCED	0.333333333333333
ENSG00000258645	HSPE1P2	repressed	-0.44895908027692755	-1.2665883365892971	-2.338963734229208	-1.4311420590924997	-0.9590363528202982	-0.7863886764018592	-0.9381100284436692	FALSE	FALSE	chr14_63550000_63650000	NA	NA
ENSG00000213928	IRF9	repressed	-0.38525038331391354	0.02821045767581328	-1.4121100268215592	-0.21841169158210827	0.2033715833647917	0.12932660259382836	0.2824365425576162	FALSE	TRUE	chr14_24100000_24200000	TAD_DOWN	0
ENSG00000100557	CCDC198	repressed	0.04183084877898327	-0.36563697577460186	-0.4183365514356335	-0.7988589318073849	-0.9973531013241462	-1.4814132131317344	-1.4985203728177146	FALSE	FALSE	chr14_57400000_58100000	NA	NA
ENSG00000240954	RPL4P1	repressed	-0.868986342913547	-1.880810528969432	-1.918397716337081	-1.5103838857781693	-1.3030316574272252	-0.45957904573642544	-0.36390297549445777	FALSE	FALSE	chr14_21700000_21800000	NA	NA
ENSG00000081181	ARG2	repressed	-0.6929537707345024	-0.379915307999367	-0.781500082004405	-1.280967966194473	-0.3148067494420932	-0.885644508856181	-0.6212652529459054	FALSE	FALSE	chr14_67600000_67700000	NA	NA
ENSG00000227051	C14orf132	repressed	-0.2675305445878968	-0.3620290668285982	-0.24096913631318911	-0.309503004222253	-0.3070547484297953	-0.8441195990289658	-1.0620954331828831	FALSE	FALSE	chr14_96000000_96100000	TAD_DOWN	0
ENSG00000168398	BDKRB2	repressed	0.14346639981820264	-0.9212150215735933	-1.6798784920882843	-2.454109606504948	-2.289760692866847	-2.6422811211102863	-2.387602648526886	FALSE	FALSE	chr14_96200000_96300000	TAD_DOWN	0
ENSG00000165929	TC2N	repressed	0.04095795399616237	0.00799856406775565	-0.2553238434669957	-1.2871466313525532	-0.8112546519126512	-0.5459243949686091	-0.5656615728594778	FALSE	FALSE	chr14_91800000_91900000	NA	NA
ENSG00000183648	NDUFB1	repressed	-0.1550411377311409	0.05502904117738876	-0.8043226129766451	-0.47468907078539185	-0.20986353477618971	-0.38142930519977863	-0.16060454222286302	FALSE	FALSE	chr14_92100000_92800000	NA	NA
ENSG00000165821	SALL2	repressed	-0.11034947393526418	-0.4134524893620489	-0.640783691567672	-1.04479749510817	-0.9567890145071436	-1.2050047881845165	-0.977485474335103	FALSE	FALSE	chr14_21450000_21600000	NA	NA
ENSG00000176153	GPX2	repressed	-0.3356668350991953	-0.20055902398402903	-0.2534532758313724	-0.7959567935075754	-0.1656899146899245	-0.5841534162967843	-0.6127306680612923	TRUE	FALSE	chr14_64900000_65000000	TAD_UP	1
ENSG00000183092	BEGAIN	repressed	0.1462749577876931	-0.5032474779513433	0.06500314472925704	-0.5301138559168349	-0.4106989579111552	-0.8468009904768945	-0.8406074660474299	FALSE	FALSE	chr14_100300000_101750000	TAD_DOWN	0
ENSG00000185070	FLRT2	repressed	0.00639616475078125	0.03546889914684495	-0.590261728677407	-0.8873170270617465	-1.3795560830364837	-1.6552932174821509	-1.7382751319136882	FALSE	FALSE	chr14_81550000_87950000	NA	NA
ENSG00000066735	KIF26A	repressed	0.16967213323633254	-0.4110069571218911	-0.13687713446507135	-0.3027150848798837	-0.4463486133103561	-0.4342772198304064	-0.8626822166677752	FALSE	FALSE	chr14_104050000_104650000	NA	NA
ENSG00000259516	ANP32AP1	repressed	-0.34424906201261457	-0.7384203346503032	-1.3244273323942473	-0.11745607372722935	-0.7591829649349062	-0.2626408704893546	-0.7134775128095613	FALSE	FALSE	chr15_35150000_35250000	NA	NA
ENSG00000104081	BMF	repressed	0.1273805150013665	0.11964581449643706	0.4856089479984248	0.41908223292527697	0.39539202090622894	-0.9497893557429056	-1.5169118024234858	FALSE	TRUE	chr15_40000000_40200000	TAD_DOWN	0
ENSG00000273679	NA	repressed	-0.973336170561512	-1.4626439358734773	-1.043170613948286	-1.785327165959408	-0.8808669614562413	-0.11792562339203042	-0.00947601972049596	FALSE	FALSE	NA	NA	NA
ENSG00000166923	GREM1	repressed	-0.24903353155641003	0.18913882759714845	-0.4315704208105487	-0.5780767813034112	-0.9461898251375956	-1.229969677671891	-1.3051243602973956	FALSE	FALSE	chr15_32600000_33050000	TAD_UP	1
ENSG00000248905	FMN1	repressed	-0.07468998029440133	0.32842853886492995	-0.13036849499002384	-0.4924067816453946	-0.2731671241136616	-0.5021187747035604	-0.82750397373871	FALSE	FALSE	chr15_33050000_34000000	NA	NA
ENSG00000259674	NA	repressed	-0.3353112713142316	-0.08225655111017979	-0.5738452219858116	-0.8316138076062248	-0.7613829599113985	-1.1737796005681052	-1.703976835018172	FALSE	FALSE	chr15_59150000_59500000	TAD_UP	1
ENSG00000171877	FRMD5	repressed	-0.10868130164590772	0.32374279685322693	0.34265049447121604	-0.6336256930904424	-0.938119789622967	-1.4935416199967582	-1.425457593855974	FALSE	FALSE	chr15_43800000_44550000	NA	NA
ENSG00000104140	RHOV	repressed	0.04869299830769322	-0.3462999071436137	-0.22937883583044696	-0.870582466231086	-0.6379275722965669	-0.5997879373971895	-0.8576782109176333	FALSE	FALSE	chr15_40800000_40900000	NA	NA
ENSG00000138623	SEMA7A	repressed	-0.34116017086700673	-0.3432805678810712	-1.37320903294686	-0.26114941052682633	-0.6110906545017427	-0.7619387468012931	-0.7631594051322387	FALSE	FALSE	chr15_74350000_74450000	NA	NA
ENSG00000166963	MAP1A	repressed	-0.11355170484173616	-0.3282141943540098	-0.3326603862498361	-0.9463468638258314	-0.840177782452502	-1.3205182079383893	-1.4790289456382788	FALSE	FALSE	chr15_43450000_43550000	NA	NA
ENSG00000140297	GCNT3	repressed	0.04258470886814407	0.05153296904973275	-0.07431823384016852	-0.6070487305354809	-0.5115501023992154	-0.7756314194405092	-0.6788424719356821	TRUE	TRUE	chr15_59500000_59650000	TAD_UP	0.75
ENSG00000185088	RPS27L	repressed	-0.20946581445644827	-0.00477696420027366	-0.7693252331997718	-0.4142966129082051	-0.3309385881634287	-0.3290505110893276	-0.2839452066549346	FALSE	FALSE	chr15_63150000_63300000	TAD_UP	1
ENSG00000255769	GOLGA2P10	repressed	-0.09285917297763992	-0.2060837201793788	0.23042766505573645	-0.12596257395916374	-0.37221080458651185	-1.7080589774989403	-0.6469123982757	FALSE	FALSE	NA	NA	NA
ENSG00000259727	NA	repressed	-0.07265855520306476	0.03158757410775394	-0.695640061773745	-0.6547643713505334	-0.7691205665737099	-1.428999891420352	-1.3054837830126564	TRUE	FALSE	chr15_62750000_63050000	TAD_BALANCED	0.4
ENSG00000140379	BCL2A1	repressed	-0.3741150292839641	-0.342376864919014	-1.1438282018326411	-1.2453970222692765	-1.4136176261378932	-2.299209829579973	-1.6608019978967838	FALSE	FALSE	chr15_79250000_80400000	TAD_BALANCED	0.5
ENSG00000166949	SMAD3	repressed	0.03467014994782347	-0.04820479278093591	-0.43105501709876526	-0.9151967048739726	-1.0713563824965535	-1.1624488205156145	-1.1663224822487428	FALSE	FALSE	chr15_66900000_67350000	TAD_DOWN	0.111111111111111
ENSG00000183208	GDPGP1	repressed	0.24308680453493797	-0.24109108504912635	-0.791910232800839	-0.8419762746900991	-0.4741797318703538	-0.32623215947675055	-0.07077772336741256	FALSE	FALSE	chr15_90150000_90250000	NA	NA
ENSG00000059145	UNKL	repressed	-0.09784265706709126	0.15021364880917612	-0.14783758368194205	-0.5223012948429785	-0.6655472952525896	-0.7768275463443817	-0.62281125197889875	FALSE	FALSE	chr16_1400000_1500000	NA	NA
ENSG00000158865	SLC5A11	repressed	-0.1300405540646363	-0.7145776686798281	0.41321349099224136	-0.6696839313418294	-0.965170518049995	-1.1625449121504572	-1.6234673486872	FALSE	TRUE	chr16_24550000_24850000	TAD_BALANCED	0.5
ENSG00000261448	NA	repressed	-0.20676153023657196	-0.16199310493272173	0.02833653416247086	-0.829615850179215	-0.4394779179060641	-0.5765413254578168	-1.3226344918865147	FALSE	FALSE	chr16_16500000_18250000	NA	NA
ENSG00000167971	CASKIN1	repressed	0.02560284104846888	-1.07123637300115	-0.7465262561477068	-0.430185075222052	-0.738020213646615	-0.5712647371757786	-1.4866979141449983	FALSE	FALSE	chr16_2150000_2250000	TAD_DOWN	0
ENSG00000125170	DOK4	repressed	0.02610649023797988	-0.16965469651251225	-0.23439684149846132	-0.5834496337864822	-0.622409721584553	-0.6622567028295587	-0.7658143429466115	FALSE	TRUE	chr16_57450000_57550000	TAD_BALANCED	0.5
ENSG00000102908	NFAT5	repressed	0.01243099651836624	0.3169525081777798	-0.5384264243102709	-0.9015952358798036	-0.6509037249935284	-0.6306420433180938	-0.4500860039265274	FALSE	FALSE	chr16_69350000_69750000	TAD_DOWN	0
ENSG00000260630	SNAI3-AS1	repressed	-0.14348929398729351	-0.976182366018776	-0.6423581676754818	-0.8925240132917374	-0.5560303523149164	-0.8647190811182041	-0.9028686527081764	FALSE	FALSE	chr16_88600000_88700000	NA	NA
ENSG00000126603	GLIS2	repressed	-0.11083704681002916	-0.8427691004973721	-1.0643820069186902	-0.6579282399671232	-0.7293345307496517	-0.609904677297929	-0.4827790924010073	FALSE	TRUE	chr16_4250000_4400000	TAD_DOWN	0
ENSG00000168140	VASN	repressed	-0.1971357934655826	-0.1749716036200316	-0.3806027398530792	-1.024340266887993	-0.8384191721169215	-1.4177679605751408	-1.239288026423459	FALSE	FALSE	chr16_4250000_4400000	TAD_DOWN	0
ENSG00000175311	ANKS4B	repressed	-0.1394585962423029	-0.6284934606855157	-0.43668581772347487	-1.5430261405907633	-0.5433418728060928	-0.8056672316031368	-1.1345887518439814	FALSE	FALSE	chr16_21150000_21300000	NA	NA
ENSG00000225614	ZNF469	repressed	0.06512915407970163	-0.05570084570326558	-0.2948603801487613	-1.019458478011297	-1.098926391848243	-1.006271539178248	-1.2068794929912423	FALSE	FALSE	chr16_87900000_88600000	TAD_UP	1
ENSG00000166473	PKD1L2	repressed	-0.1878588977851857	-0.5433440001520548	-0.7476578375501456	-0.7245505572112205	-0.5324481509394775	-1.1990198121999824	-1.1042664163533598	FALSE	FALSE	chr16_81200000_81350000	NA	NA
ENSG00000135697	BCO1	repressed	-0.10403609972685754	0.04747608101864752	-0.13930775482754093	-0.6837974786307952	-0.9334935815310864	-0.9418758675012374	-1.0953047732627803	FALSE	FALSE	chr16_81200000_81350000	NA	NA
ENSG00000140961	OSGIN1	repressed	-0.2613447239902868	-0.33913901106186034	-0.5247002796834693	-1.6115927831039445	-2.2857225112580477	-1.970301327541068	-1.9068071796267037	FALSE	FALSE	chr16_83900000_84100000	NA	NA
ENSG00000162040	HS3ST6	repressed	0.07200265334187655	-0.1026672914563558	-0.7535981616292057	-1.0839239941512988	-1.12207083574132	-2.1942898775490693	-1.3126996487525515	FALSE	TRUE	chr16_1850000_1950000	TAD_BALANCED	0.5
ENSG00000187185	NA	repressed	-0.10313757640774111	-0.1313331628032106	-0.4006606955836179	-1.1815119962166611	-1.2078361552889378	-1.5858986753743154	-1.4980777031572938	FALSE	TRUE	chr16_57550000_58150000	TAD_DOWN	0.3
ENSG00000102981	PARD6A	repressed	-0.5776345281628424	-1.6266570650522991	-0.23656868288008412	-1.620355253749841	-0.4210437411357864	-0.7975371401159791	-0.3684637678018509	FALSE	FALSE	chr16_67500000_67700000	TAD_UP	1
ENSG00000162039	MEIOB	repressed	-0.08334363782012018	0.17498282093495987	-0.587333838315782	-0.5493027132660768	-0.4374475094845555	-0.9011318500484922	-1.019984511727405	FALSE	FALSE	chr16_1850000_1950000	TAD_BALANCED	0.5
ENSG00000223224	SNORD71	repressed	-1.265779135615344	-1.7218194104161706	-2.7185070312469533	-1.7108213201222375	-1.1444167707642765	-0.433424719528735	0.05952365462079673	FALSE	FALSE	chr16_71750000_71900000	NA	NA
ENSG00000277639	NA	repressed	-0.2178400608648907	-0.403860749695331	-0.6923848036572097	-0.6693032583310907	-0.7026571817499337	-0.6328159547762724	-0.955558873742124	FALSE	FALSE	chr16_53050000_53200000	TAD_DOWN	0
ENSG00000091262	ABCC6	repressed	0.16357495555434204	-0.1082399917218371	-0.05634635849458761	-0.814564884063318	-0.8789940368276608	-0.1937481767643748	-0.7041257381712875	FALSE	FALSE	chr16_16150000_16250000	NA	NA
ENSG00000180787	ZFP3	repressed	0.05230520245914683	0.02980376440397444	-0.7836238967069479	-0.11074118096878569	-0.3744011173807683	-0.2784311492398689	0.2794422260258983	FALSE	FALSE	chr17_5050000_7050000	TAD_UP	1
ENSG00000132517	SLC52A1	repressed	-0.6600846943209936	-2.0666135264851917	-1.1002972612544637	-0.9989150430586416	-0.8323551132958863	-0.9596252927713638	-0.8193372055730139	FALSE	FALSE	chr17_5050000_7050000	TAD_UP	1
ENSG00000141738	GRB7	repressed	-0.1941534249577888	-0.7930636275981965	-1.032577807323206	-0.7294823106919118	-0.7038359006947965	-1.7668823500818889	-1.2945856596085423	FALSE	FALSE	chr17_39500000_40000000	TAD_DOWN	0
ENSG00000108691	CCL2	repressed	-1.0784041262025963	-0.40757860061227785	-1.7909644259955038	-2.1960613922540344	-1.5220166397688697	-2.0130818095104788	-1.5060972378888091	FALSE	FALSE	chr17_32400000_36150000	TAD_UP	1
ENSG00000277363	SRCIN1	repressed	0.17964038283015604	-1.029143562039972	-0.3959264890423785	-0.5997243412160238	-0.4814621085908989	-0.12204741161355952	-0.3015570615389464	FALSE	FALSE	chr17_38300000_38700000	TAD_DOWN	0
ENSG00000263874	LINC00672	repressed	-0.2000569049544124	-1.0246302554658675	-0.4831559335788128	-0.19607736738754863	0.00612404070666728	-0.3305206796215952	-0.21752919458566497	FALSE	FALSE	chr17_38850000_38950000	TAD_DOWN	0
ENSG00000264456	NA	repressed	-0.39986609687562413	-0.6349071662498749	-0.6818637477492296	-0.4269407335914675	-0.4759759200924509	-1.0043058128408413	-0.7374889818381872	FALSE	FALSE	chr17_30900000_31000000	NA	NA
ENSG00000173805	HAP1	repressed	-0.03591679165635229	-0.36465220308624297	-0.3155893239890408	-0.8894485723338068	-0.9616391262589348	-1.171366746493949	-1.0599388926156474	FALSE	FALSE	chr17_41700000_41950000	TAD_DOWN	0
ENSG00000197566	ZNF624	repressed	-0.04320549756644745	-0.14986398330154485	-1.2067250320579843	-1.1327773526276406	-1.0055854660870605	-1.0014332175441334	-1.0999491448647694	FALSE	FALSE	chr17_16550000_17000000	NA	NA
ENSG00000173801	JUP	repressed	-0.21615149212150517	-0.3990130248096338	-0.32989356316189855	-0.5810354315579781	-0.4376238235338814	-0.8133038937454717	-0.9080210724667688	FALSE	TRUE	chr17_41700000_41950000	TAD_DOWN	0
ENSG00000204815	ODAD4	repressed	-0.1678365073029091	-0.5994761793660536	-0.6030530772426004	-0.6577920705807949	-0.4945063498072058	-1.2730897492906237	-1.0294761705100028	FALSE	FALSE	chr17_41700000_41950000	TAD_DOWN	0
ENSG00000176927	EFCAB5	repressed	-0.4421572974085909	-0.262966911929295	-0.6280736659146389	-0.3154365749698098	-1.0046404833600322	-1.6561312836122517	-1.1841304474097885	FALSE	FALSE	chr17_29550000_30100000	TAD_UP	1
ENSG00000108370	RGS9	repressed	-0.19111481409997796	-0.3324662244537385	-0.4004875323905329	-0.5831080846858889	-0.7169545100217408	-0.9327483545163828	-0.9538405407678896	FALSE	FALSE	chr17_64750000_67350000	TAD_UP	0.9
ENSG00000006283	CACNA1G	repressed	-0.02616471543429637	-0.25180210070889375	-0.11612944739129771	-0.44665057646724393	-0.4868183109377104	-0.6538320185543466	-0.8054604435047198	FALSE	FALSE	chr17_50500000_50750000	TAD_BALANCED	0.6
ENSG00000168646	AXIN2	repressed	-0.2913984916830769	-0.6838492210006333	-1.0933939389205676	-1.0532021464002777	-0.6486585498379501	-0.4362512556527815	-0.2596372279346863	FALSE	FALSE	chr17_64750000_67350000	TAD_UP	0.9
ENSG00000171931	FBXW10	repressed	0.28528720414628006	-0.7127798319708102	-0.5214661117580373	-0.7386978223378328	-0.45945953530563927	-0.8042736883636992	-1.1971712535336068	FALSE	FALSE	chr17_18600000_19050000	NA	NA
ENSG00000125398	SOX9	repressed	-0.26316000826649116	-0.30778984214985894	-0.6663416581205023	-0.8647887326301014	-0.6926174635817405	-1.035966899105451	-1.0858692040936249	FALSE	TRUE	chr17_68050000_73400000	TAD_BALANCED	0.666666666666667
ENSG00000215030	RPL13P12	repressed	-0.5218467639076407	-0.6564069707350119	-1.433538772189584	-0.7432584355668571	-0.8158160736850677	-0.41669467938698174	-0.6237258723095974	FALSE	FALSE	chr17_17300000_17650000	TAD_DOWN	0
ENSG00000241322	CDRT1	repressed	-0.03176050140562407	-0.32225230461467236	-0.48659107195645046	-0.8802281609611604	-0.8175502172954363	-0.879307451461949	-1.0798192315362345	FALSE	FALSE	chr17_15600000_15700000	NA	NA
ENSG00000065325	GLP2R	repressed	-0.22193809177150692	0.03686462658645237	-0.081568558603019	-0.5195718356917016	-0.3602451276396611	-0.5976631229626143	-0.7809332153824364	FALSE	FALSE	chr17_9600000_15600000	TAD_UP	0.875
ENSG00000176170	SPHK1	repressed	0.11646294611031847	-0.41440371471066434	-0.02157705477883811	-0.01307924709269827	-0.3988764074704117	-0.5913122709323179	-0.8605565940439316	FALSE	FALSE	chr17_74700000_81700000	TAD_BALANCED	0.677966101694915
ENSG00000180336	MEIOC	repressed	0.00671556328591742	-0.1994762615102976	-0.7488522962840022	-0.5403596926059464	-0.5529583762569495	-0.75380536946339	-0.6254155011385636	FALSE	FALSE	chr17_44650000_44750000	NA	NA
ENSG00000267160	NA	repressed	-0.3696448295051454	0.06507447411144761	-1.2846986518659145	-0.7274778348342162	0.18698207489693203	-0.11733478161442698	0.1661718562544498	FALSE	FALSE	chr17_44650000_44750000	NA	NA
ENSG00000228331	RPL17P43	repressed	-0.5345171990984571	-1.330026667933783	-1.6190725818215976	-1.6075737932222287	-2.1399742423461183	-0.9173415375540728	-0.7237729770922273	FALSE	FALSE	chr17_19350000_19500000	NA	NA
ENSG00000188878	FBF1	repressed	-0.04720228094071065	-0.766963499443425	-0.32609402845086427	-0.3945240603324728	-0.3903818346850574	-0.7347885910463562	-0.5282293841531697	FALSE	FALSE	chr17_74700000_81700000	TAD_BALANCED	0.677966101694915
ENSG00000141052	MYOCD	repressed	0.03559591951810768	-0.02721083336427845	-0.871682128613525	-1.6356614388232462	-1.507559359401635	-1.501409712691567	-1.289242229893581	FALSE	FALSE	chr17_9600000_15600000	TAD_UP	0.875
ENSG00000198242	RPL23A	repressed	-0.03907563465865635	-0.10040837825519938	-0.7656059417462565	-0.31419054793829615	-0.33039438197184146	-0.203752220781112	-0.18760876067070317	FALSE	FALSE	chr17_28650000_28750000	TAD_DOWN	0
ENSG00000238578	SNORD4A	repressed	-0.04280690881197827	-0.5923651633581469	-1.356360140044924	-0.1882372552577235	-0.11684328208027173	-0.15503571268946476	-0.3630969273161665	FALSE	FALSE	chr17_28650000_28750000	TAD_DOWN	0
ENSG00000123700	KCNJ2	repressed	-0.27927894896466415	-0.9309204955859232	-0.6041083140899993	-1.3913949861184451	-1.294796518574557	-0.9682779792767322	-1.305153444258545	FALSE	FALSE	chr17_68050000_73400000	TAD_BALANCED	0.666666666666667
ENSG00000271605	MILR1	repressed	-0.30622995602363057	-0.437789522663094	-0.9390294726050464	-0.8954858245495728	-0.2773892503973921	-0.9954684851739436	-0.539273148177287	FALSE	FALSE	chr17_63850000_64500000	TAD_UP	1
ENSG00000266074	BAHCC1	repressed	0.10890962664035468	-0.33750542284667046	-0.01941998084081491	-0.6503871959399035	-0.7487854148265616	-0.8839787491800255	-0.8499007390152528	FALSE	FALSE	chr17_74700000_81700000	TAD_BALANCED	0.677966101694915
ENSG00000184557	SOCS3	repressed	-0.5148429492641132	-1.2020760655164229	-0.1695302709709701	0.225060839290355	0.3790723331413853	0.7182711001577321	0.8579479783049045	FALSE	TRUE	chr17_74700000_81700000	TAD_BALANCED	0.677966101694915
ENSG00000196535	MYO18A	repressed	-0.06922958607828793	-0.3388722036464104	-0.17335641930139944	-0.7314700274250818	-0.5375171443930746	-0.6685493622946458	-0.97257136945493206	FALSE	FALSE	chr17_29150000_29250000	TAD_DOWN	0
ENSG00000108684	ASIC2	repressed	-0.4164348258492684	0.08827964046588407	-0.26107904451276714	-0.4963740062810581	-1.1497958048858832	-1.6529844210547475	-1.9126684832341103	FALSE	FALSE	chr17_32400000_36150000	TAD_UP	1
ENSG00000007237	GAS7	repressed	-0.5305140639603213	-0.4386597081933331	-0.16059616494071566	-0.9400579065075988	-0.4262823407266026	-0.9832396464830208	-1.0732319768526428	FALSE	FALSE	chr17_9600000_15600000	TAD_UP	0.875
ENSG00000184922	FMNL1	repressed	0.06370340080586018	-0.3717577961004978	-0.22219054001512	-0.5278595911307087	-0.6403949458502625	-0.6168514282805625	-0.7860206739842291	FALSE	FALSE	chr17_45150000_45250000	TAD_DOWN	0
ENSG00000267278	MAP3K14-AS1	repressed	-0.01020494532395214	-0.6195491687953117	-0.656365702210411	-0.6951234105111143	-0.6819416663928564	-0.5353131461216956	-0.8746835668173684	FALSE	FALSE	chr17_45150000_45250000	TAD_DOWN	0
ENSG00000006062	MAP3K14	repressed	-0.01929260908265967	-0.3128827949604245	-0.9045235013541338	-0.8884820956209002	-1.3273288952270828	-1.144506309084545	-1.103059132208838	FALSE	TRUE	chr17_45250000_45400000	TAD_DOWN	0.25
ENSG00000108852	MPP2	repressed	0.10419826339604712	-0.21576192858783383	-0.44632529776148167	-0.5764506605673937	-1.0524348375927806	-0.4777560975577648	-0.7246251144212594	FALSE	FALSE	chr17_43850000_44050000	NA	NA
ENSG00000273706	LHX1	repressed	-0.11882208393005964	-0.7610682698240089	-1.609337872592478	-2.11104985573128	-1.1641470235387892	-1.708418111747303	-2.057787852703895	FALSE	FALSE	chr17_36550000_37250000	NA	NA
ENSG00000265688	MAFG-DT	repressed	-0.01412276196026842	-0.628476981797017	-0.6706439165470962	-0.8382616530748316	-1.3230680238625017	-1.437301776216852	-1.0668910795960191	FALSE	TRUE	chr17_81900000_82000000	TAD_DOWN	0
ENSG00000166750	SLFN5	repressed	0.17566547158390097	-0.11453377157307831	-0.453115326182132	-0.954227104574884	-0.8917856362528749	-0.9811622935461912	-1.0122711315630692	FALSE	FALSE	chr17_32400000_36150000	TAD_UP	1
ENSG00000120093	HOXB3	repressed	-0.11083591618501884	-0.5812074286212005	-0.8421567926686431	-0.7787138051976829	-0.5195272647590135	-0.41611818459890504	-0.5113932800869725	FALSE	TRUE	chr17_48000000_48650000	TAD_BALANCED	0.6
ENSG00000173917	HOXB2	repressed	-0.7111173422789611	-0.4146740691355512	-1.6759610520002777	-1.5372896059260388	-1.166757431395517	-1.903445440472597	-1.2752103872042049	FALSE	FALSE	chr17_48000000_48650000	TAD_BALANCED	0.6
ENSG00000108448	TRIM16L	repressed	0.00704723230400425	0.00972721277460261	-0.01942693539626767	-0.4420251124348836	-0.5302857990491852	-0.7388772788676619	-0.7734471818382103	FALSE	FALSE	chr17_18600000_19050000	NA	NA
ENSG00000167105	TMEM92	repressed	-0.08226603452627788	-0.34685506035284674	-0.6994330558960714	-1.0404099902788924	-1.0081184537702432	-1.2671848346845354	-1.5598598191839217	FALSE	FALSE	chr17_50200000_50300000	NA	NA
ENSG00000274565	NA	repressed	-0.5603639754027644	-0.17710680972046733	0.126541708495622	-1.0215167845619113	-1.376887237248527	-1.5204878896772724	-2.1283880656529033	FALSE	FALSE	chr17_62600000_62700000	NA	NA
ENSG00000161682	FAM171A2	repressed	-0.07882399971593283	-0.37728863735473905	-0.7218516167186763	-0.5853703310316533	-0.27209947387590455	-0.8379297800730295	-0.6902950051191712	FALSE	FALSE	chr17_44350000_44500000	TAD_UP	1
ENSG00000275410	HNF1B	repressed	-0.142501086379188	-0.1762779330106186	-0.8015728744984593	-1.027014205199149	-0.9723607015645386	-0.8079790380950888	-0.8114109899867049	FALSE	FALSE	chr17_37600000_37850000	TAD_DOWN	0
ENSG00000168517	HEXIM2	repressed	-0.2983525055377998	-0.790861047285828	0.01350593128040208	-0.5514512610019753	-0.5147679751773385	-0.4208003072615792	-0.7753127586459811	FALSE	FALSE	chr17_45150000_45250000	TAD_DOWN	0
ENSG00000132535	DLG4	repressed	-0.12353389329813502	-0.513167103192287	-0.7459892982594577	-0.8175502847047793	-0.8110702337971738	-0.9203589759381288	-0.8255328414517354	FALSE	TRUE	chr17_7150000_7250000	TAD_DOWN	0
ENSG00000129646	QRICH2	repressed	-0.15167684481564966	-0.6058431723936042	-0.06258345763131731	-0.5363818404326214	-0.784756939748717	-0.8925837185610905	-1.1508068026300369	FALSE	FALSE	chr17_74700000_81700000	TAD_BALANCED	0.677966101694915
ENSG00000271013	LRRC37A9P	repressed	-0.0395206814560901	-0.30666074548917516	-0.2632773623262601	-2.9206025151674786	-0.7726027601009208	-0.944112210481286	-0.5830155252616699	FALSE	FALSE	chr17_32400000_36150000	TAD_UP	1
ENSG00000221995	TIAF1	repressed	0.11048275842805218	-0.7070831393456867	-2.2123355540426575	-1.6257699234379512	-1.2306014813225703	-0.794579029217481	-1.5574989679497526	FALSE	FALSE	chr17_28950000_29150000	NA	NA
ENSG00000153982	GDPD1	repressed	-0.1635306423012405	-0.8445648288861607	-1.490234143557546	-1.509147421934127	-1.0428989867112253	-1.382344027114644	-0.8220254084550719	FALSE	FALSE	chr17_59150000_59250000	NA	NA
ENSG00000170412	GPRC5C	repressed	-0.05757753060608248	-0.4246618454517064	-0.06605872714437167	-0.34271867261960354	-0.3918352761419769	-0.7941744930729563	-0.9399612763624564	FALSE	FALSE	chr17_74250000_74700000	NA	NA
ENSG00000266401	NA	repressed	-0.08138667015197783	0.11253488700267686	-0.14786427007109354	-0.5331071019371562	-0.33519166397811795	-0.8602228296523391	-0.7528495353709547	FALSE	TRUE	chr18_3250000_4050000	TAD_BALANCED	0.571428571428571
ENSG00000265962	GACAT2	repressed	-0.08089486124786639	-0.5119264649773283	-0.32619738417062955	-0.7278179930939378	-1.057469260694934	-1.5608915933000878	-1.5405881202811835	FALSE	FALSE	chr18_8650000_9050000	TAD_UP	1
ENSG00000262001	DLGAP1-AS2	repressed	0.1588488571874457	-0.32037910390850355	0.02616660173454741	-0.513656391004948	-0.6141524441004853	-0.9214774132780864	-0.8201388906806156	FALSE	FALSE	chr18_3250000_4050000	TAD_BALANCED	0.571428571428571
ENSG00000167306	MYO5B	repressed	-0.16084469928499098	-0.06256553832538561	-0.355741186793714	-0.6673998061560217	-0.6369572317410743	-1.335981362500297	-1.1080593667927954	FALSE	FALSE	chr18_49450000_50450000	TAD_DOWN	0
ENSG00000071991	CDH19	repressed	-0.15103632235399847	0.27756490500858455	-0.1153324267815019	-0.3143038251575497	-0.2233357998350251	-0.6256275800966381	-0.8971233596629901	FALSE	FALSE	NA	NA	NA
ENSG00000197971	MBP	repressed	-0.14703980714399073	0.00528429435730357	-0.20155589261013007	-0.7770267937998083	-0.691885221130041	-0.8009601828771219	-0.7867468006787418	FALSE	FALSE	chr18_76900000_79650000	NA	NA
ENSG00000265778	ZNF516-AS1	repressed	-0.3818612625288239	-0.7709107498802312	-1.640655221106589	-0.4731186816207618	-0.8651193730164956	-0.462411547813305	-0.31257179141091346	FALSE	FALSE	chr18_74350000_76750000	TAD_UP	1
ENSG00000186814	ZSCAN30	repressed	-0.06525062274582259	-0.2542469427373864	-0.3499356797184326	-0.5836437013837471	-0.3828577070018714	-0.8100634121107506	-0.33121700010216604	FALSE	FALSE	chr18_34800000_36850000	TAD_BALANCED	0.5
ENSG00000266835	GAPLINC	repressed	-0.2631559088833022	-0.12568295220646197	-0.1111292946410336	-1.2445933175262012	-1.0780730262087246	-1.350983517487336	-0.9670370441944894	TRUE	FALSE	chr18_3250000_4050000	TAD_BALANCED	0.571428571428571
ENSG00000177426	TGIF1	repressed	-0.0599931853838264	-0.35165984980011933	-0.7109943130997014	-0.8191941644841149	-0.7143134644525616	-0.6709787602497322	-0.607873338324719	FALSE	TRUE	chr18_3250000_4050000	TAD_BALANCED	0.571428571428571
ENSG00000196628	TCF4	repressed	0.11462515317897322	0.13033377002405	0.1587272021429126	-0.23842663210909287	-0.4605717311617279	-0.5881734069225606	-0.7508641420392462	FALSE	FALSE	chr18_54350000_56700000	TAD_UP	1
ENSG00000119547	ONECUT2	repressed	0.22259874652143732	-0.23491339186318816	-0.680007990909722	-0.5208252071292547	-0.7229493190519379	-0.6633967000768687	-0.919287738355744	FALSE	FALSE	chr18_56700000_57550000	NA	NA
ENSG00000198796	ALPK2	repressed	-0.09733781222884236	0.1754130480026385	-0.15365588543521105	-0.46711417781547726	-0.4277818176426592	-0.8140193225787549	-0.7412961299365723	FALSE	FALSE	chr18_58500000_58750000	TAD_UP	0.75
ENSG00000267226	MALT1-AS1	repressed	-1.4459968335969302	-0.271440793250999	-1.3336152203579086	-1.4490064632683075	-2.3118952123186993	-1.6263510144242088	-1.0904719816666022	FALSE	FALSE	chr18_58500000_58750000	TAD_UP	0.75
ENSG00000141448	GATA6	repressed	0.1235296702413444	-0.24690603419031612	-0.6550244804402328	-1.3312635262706431	-0.9756160890743611	-0.9834883348933856	-1.0448571972297418	FALSE	FALSE	chr18_21850000_23000000	TAD_UP	1
ENSG00000263606	CHORDC1P4	repressed	0.04561202481773553	-0.6832480970220768	-1.0699323864846195	-0.8646287278899872	-0.36688277227816574	-1.5395554826695856	-0.9061241863947588	FALSE	FALSE	chr18_2750000_3250000	TAD_UP	1
ENSG00000125845	BMP2	repressed	0.2696215075112973	-0.5477064039518758	-2.257022913863996	-1.4723178847087286	-1.5888127354614556	-1.3373814709022858	-1.4847537686287442	FALSE	FALSE	chr20_6100000_8750000	TAD_UP	1
ENSG00000088826	SMOX	repressed	0.06007440963737161	-0.37194773141313986	-0.6859184173736472	-0.7977445198773778	-0.9202218497636984	-0.8094858988275841	-0.7869978919218525	FALSE	TRUE	chr20_4100000_4200000	TAD_BALANCED	0.333333333333333
ENSG00000125848	FLRT3	repressed	-0.05762298643840814	-0.28949469674334344	-0.5567670902070033	-0.8369504862635011	-0.31731642772552304	-0.4770374575535887	-0.26680616740764934	FALSE	FALSE	chr20_13800000_16850000	TAD_UP	0.875
ENSG00000125864	BFSP1	repressed	-0.32881184366332433	-0.4111457529685189	-0.31162001298155917	-0.5293574588423688	-0.605871814714522	-1.1943745079883423	-1.284539891523023	FALSE	FALSE	chr20_16850000_25000000	TAD_UP	0.961538461538462
ENSG00000064655	EYA2	repressed	-0.34539352860821254	-0.15286102943845994	-0.5131177071830496	-0.06812666247500757	-0.8406634346108344	-0.2324454915903925	-0.8584459599902008	FALSE	FALSE	chr20_46000000_49050000	TAD_UP	1
ENSG00000259974	LINC00261	repressed	-0.11082533195136948	-0.0070735475725663	-0.4609038181549237	-0.9454140849186968	-0.7224933784239075	-1.3921890865538884	-1.6068577745813393	FALSE	FALSE	chr20_16850000_25000000	TAD_UP	0.961538461538462
ENSG00000019186	CYP24A1	repressed	-0.00394314254389283	-0.5206172551041551	-1.7925004380199046	-2.517946127341371	-2.5806619516050735	-2.192372350048041	-1.8056399379472432	TRUE	TRUE	chr20_52150000_54700000	TAD_DOWN	0.214285714285714
ENSG00000278709	NKILA	repressed	-0.12045070847990806	-0.2941756965585504	-0.35172770784013624	-0.4182197985991285	-0.7348597965314521	-1.2027206372100028	-0.9741093369070656	FALSE	TRUE	chr20_57350000_59550000	TAD_UP	0.75
ENSG00000087510	TFAP2C	repressed	-0.08948373099477185	-0.23616226949227528	-0.573467939328891	-0.7670927915114544	-0.6561929224418672	-0.6005726291734784	-0.6626537802856769	FALSE	FALSE	chr20_56500000_57100000	NA	NA
ENSG00000064787	BCAS1	repressed	-0.04795867521728334	0.04611829217250974	-0.1024881163931706	-0.8236088219656201	-0.5448089201723512	-0.9852271856501732	-1.4589562069489526	FALSE	TRUE	chr20_52150000_54700000	TAD_DOWN	0.214285714285714
ENSG00000125510	OPRL1	repressed	-0.04118281713912528	-1.085474466603914	-0.0351343645946007	0.34158050247166505	-0.4602962829681044	0.18321796357039244	-0.1079524996405676	FALSE	FALSE	chr20_63500000_64150000	TAD_BALANCED	0.5
ENSG00000271303	SRXN1	repressed	0.11105063875835908	0.10475247350844467	-0.8195565278899545	-0.8301308919208878	-0.7358990574600404	-0.8769700515764086	-0.9905101875686246	TRUE	FALSE	chr20_500000_2700000	TAD_UP	1
ENSG00000275620	FLJ16779	repressed	-0.13518596201120953	-0.33019024966381394	-0.2188637443841931	-0.654443763759398	-1.1529167311692774	-1.983741111994412	-2.0070300650357096	FALSE	FALSE	chr20_62950000_63500000	TAD_DOWN	0
ENSG00000130584	ZBTB46	repressed	-0.08657226253250254	-1.2838764126398292	-0.8429396067657693	-0.7617535132816401	-0.7067522928474369	-0.7634696458157477	-1.0851508070509757	FALSE	FALSE	chr20_63500000_64150000	TAD_BALANCED	0.5
ENSG00000197122	SRC	repressed	0.10138000777909106	-0.24293444216203453	-0.23433646798904817	-0.866307394527655	-1.0268181844113584	-1.240267439619363	-1.3070563680798033	FALSE	TRUE	chr20_37150000_38450000	TAD_UP	0.785714285714286
ENSG00000125798	FOXA2	repressed	-0.1711191327387468	-0.27377094064335505	-0.576472426224101	-0.8304119635132926	-0.9250738341215868	-0.9941186150318614	-1.0818403210894287	FALSE	FALSE	chr20_16850000_25000000	TAD_UP	0.961538461538462
ENSG00000101017	CD40	repressed	-0.12708434732701906	-0.5013922178252288	-0.6425057978285164	-0.5060642102311936	-0.7663420120173249	-1.1035610883590008	-0.8037351150791678	FALSE	FALSE	chr20_46000000_49050000	TAD_UP	1
ENSG00000285230	RALY-AS1	repressed	-0.05198688543770448	-0.2603044274544166	-0.2351200447397721	-0.6534612781474358	-0.41238714090962625	-1.2615111698115409	0.04913849775440727	FALSE	FALSE	chr20_33350000_34150000	NA	NA
ENSG00000267056	NA	repressed	0.17489523587548447	0.2713203478562645	-0.13029346229977784	-0.5483454773071507	-0.4161436679610241	-0.5666117408047135	-1.4095525901813968	FALSE	FALSE	chr19_15600000_16050000	TAD_UP	1
ENSG00000127220	ABHD8	repressed	0.02126789081491762	-0.4681853715633956	-0.32910195044908613	-0.5293484944713475	-0.5454452706104104	-1.0060619089161762	-0.5486271002586697	FALSE	FALSE	chr19_17300000_17400000	TAD_DOWN	0
ENSG00000130475	FCHO1	repressed	-0.06710420939989652	-0.8603301089487294	-0.5941157051822105	-0.6666742279310005	-0.7795803085312141	-1.1167270309625352	-0.9893313984639658	FALSE	FALSE	chr19_17400000_17850000	NA	NA
ENSG00000176222	ZNF404	repressed	-0.6515075692355298	-0.6692890026078739	-1.6489574570976568	-0.6809124926498998	-0.858526475923749	-0.8701564430284592	-0.7350622503264858	FALSE	FALSE	chr19_43800000_44550000	NA	NA
ENSG00000011422	PLAUR	repressed	0.00896910377877718	-0.4630802043559845	-0.6551412288416657	-0.9142980303337764	-0.947533567426352	-1.1314730128259416	-1.2632035696749853	FALSE	FALSE	chr19_43650000_43800000	TAD_DOWN	0
ENSG00000069399	BCL3	repressed	-0.04569926769199024	-1.11392798169527	-0.960247148833632	-0.7742407424623167	-0.4600471068700535	-0.07651266856682049	0.01567435975762972	FALSE	TRUE	chr19_44550000_44900000	TAD_BALANCED	0.4
ENSG00000256087	ZNF432	repressed	-0.05716326598368636	-0.18084390559709412	-0.899489585728989	-0.5670164065769412	-0.4690493448564953	-0.47136552603199067	-0.4948832531599586	FALSE	FALSE	chr19_51000000_58550000	TAD_DOWN	0.3
ENSG00000275395	FCGBP	repressed	-0.10092436854828984	-1.3539582149984843	-0.7647422606339765	-1.9086578264656249	-1.0817923807236611	-0.9178840963257636	-2.243205379262774	FALSE	TRUE	NA	NA	NA
ENSG00000161243	FBXO27	repressed	-0.24989895558029113	-0.4704492507553987	-0.1230412544729972	-0.44046055576329063	-0.6559971585840804	-0.696204893831881	-0.7514658409929359	FALSE	FALSE	NA	NA	NA
ENSG00000188766	SPRED3	repressed	0.1528608310122351	-0.6958712093262334	-1.5446185964980097	-0.71760500445804	-0.985049782559846	-0.939012899447783	-0.8971561833369637	FALSE	FALSE	NA	NA	NA
ENSG00000176531	PHLDB3	repressed	-0.32173716940481895	-0.5604417946076907	-1.0179312304661758	-0.49066467427607297	-0.8654345817703323	-1.0689840698633704	-0.7749695461954161	FALSE	FALSE	chr19_43400000_43550000	NA	NA
ENSG00000125740	FOSB	repressed	-0.32638396475432113	-0.9651231362905538	-0.762942962608485	-1.3338408102728558	-0.910274004506767	-0.9164391734327868	-0.7982449335345342	FALSE	TRUE	chr19_45400000_45500000	TAD_DOWN	0
ENSG00000160469	BRSK1	repressed	-0.1398096395504309	-0.6925960980003866	-0.9711096537704612	-0.790847900977263	-0.4625216418945325	-1.0057871386967412	-1.1512055770076854	FALSE	FALSE	chr19_51000000_58550000	TAD_DOWN	0.3
ENSG00000256060	TRAPPC2B	repressed	-0.30752773280736273	-0.756724052911872	-1.023032736395308	-0.6615323764155544	-1.316272302426497	-0.655703249671393	-0.8344336519672642	FALSE	FALSE	chr19_51000000_58550000	TAD_DOWN	0.3
ENSG00000104856	RELB	repressed	0.12718585177581992	0.10430598579229956	-0.17344674540726254	-0.28232627205432503	-0.7518092459184581	-0.9964180627943025	-1.3627368701645677	FALSE	FALSE	chr19_45000000_45100000	NA	NA
ENSG00000275234	NA	repressed	-0.11254516619724754	-0.12999273883614984	-0.6839050515206065	-0.515107011731009	-0.8075581503675089	-1.0080349973000955	-1.2490009981835757	FALSE	FALSE	chr19_5900000_6950000	TAD_DOWN	0.25
ENSG00000125657	TNFSF9	repressed	-0.6540650948131681	-0.3942292100205544	-1.632466781810204	-1.7448211238254232	-1.4322676918370996	-1.714216595689874	-1.3957228899747107	FALSE	FALSE	chr19_5900000_6950000	TAD_DOWN	0.25
ENSG00000125726	CD70	repressed	-0.34751091937516587	-0.4974609041526	-0.8094883650142439	-0.8064566836244477	-0.7626530207944062	-1.6908313419421404	-1.507424003790416	FALSE	FALSE	chr19_5900000_6950000	TAD_DOWN	0.25
ENSG00000204869	IGFL4	repressed	-0.2071376653093445	-0.15651117729360464	-0.8459610867436629	-0.9094380088873903	-0.9215926477995936	-1.212114742563929	-1.4744863644705226	TRUE	FALSE	chr19_45900000_46600000	TAD_UP	1
ENSG00000239830	RPS4XP22	repressed	-0.5922682822530417	-1.07515583576638	-0.987711285326771	-0.9010931508619532	-0.7054178508636298	-0.5838929342526942	-0.2122710973006899	FALSE	FALSE	NA	NA	NA
ENSG00000131409	LRRC4B	repressed	0.07968900273425077	-0.7060644720887101	-0.7007032168879107	-0.6156092315744814	-0.784077380820549	-1.0233772744339218	-1.4322266966168131	FALSE	FALSE	chr19_50500000_50800000	TAD_DOWN	0
ENSG00000233527	ZNF529-AS1	repressed	-0.46879305012861794	-0.5379527269738855	-0.9802078656740784	-0.7084298426446091	-0.7400247079844139	-0.5992358085789194	-0.3997131691693429	FALSE	FALSE	NA	NA	NA
ENSG00000197019	SERTAD1	repressed	-0.1598327224041161	-0.9348322534539388	-0.5410638572889036	0.0733129907823829	-0.12004980011799428	-0.17462532574971873	-0.25415758800579163	FALSE	FALSE	NA	NA	NA
ENSG00000127528	KLF2	repressed	-0.12717030063423948	-1.2589475201483675	-1.131506075868839	-0.3866359327585322	-0.4412662378757168	-0.45942350520465813	-0.63285921894016	FALSE	FALSE	chr19_16250000_16400000	TAD_UP	1
ENSG00000087074	PPP1R15A	repressed	-0.4204627573691104	-0.7596084144226579	-0.2481512577584062	-0.4071981307059086	-0.6566623689207564	-0.2704458280888622	-0.3308237494491622	FALSE	FALSE	chr19_48750000_49000000	TAD_DOWN	0
ENSG00000133247	KMT5C	repressed	-0.10807905465058856	-0.429895616417331	-0.6228804917306126	-0.5832184646606634	-0.7559775922536855	-0.8717777454004675	-0.5845955789329994	FALSE	FALSE	chr19_51000000_58550000	TAD_DOWN	0.3
ENSG00000095752	IL11	repressed	-0.4457648937815115	-1.7047814285598035	-3.0959082243545497	-3.050768415192638	-3.7306693624943295	-3.2199476467952697	-3.560095553846441	FALSE	TRUE	chr19_51000000_58550000	TAD_DOWN	0.3
ENSG00000240225	ZNF542P	repressed	-0.03759881226924911	-0.4107258289198811	-0.8374024142084763	-0.12933747685887945	-0.5921149733973059	-0.48346922603292247	-0.3702006766294525	FALSE	FALSE	chr19_51000000_58550000	TAD_DOWN	0.3
ENSG00000198440	ZNF583	repressed	-0.4408752410890841	-0.09656657049657484	-0.8858256952109731	-0.5687461623250029	-0.3012104304404431	-0.40737188234363786	-0.22170130625511353	FALSE	FALSE	chr19_51000000_58550000	TAD_DOWN	0.3
ENSG00000130813	SHFL	repressed	-0.49907260131516745	-0.6441830673451665	-0.6311299390826589	-0.9257570487179176	-0.7695922256071144	-0.8364792884572674	-0.6013483932399308	FALSE	FALSE	chr19_9900000_10100000	NA	NA
ENSG00000090339	ICAM1	repressed	-0.5241890903990007	-0.38180177790351993	-0.6641430329828173	-1.081566530919314	-1.5268649786545438	-1.3799672617172936	-1.2765896508648031	FALSE	FALSE	chr19_10250000_10400000	TAD_DOWN	0
ENSG00000167600	CYP2S1	repressed	-0.02666627632352168	-0.6025038955241635	-0.29936746128765707	-0.885173817253317	-0.6649650851119701	-0.935269210355536	-1.0767473521303252	FALSE	FALSE	NA	NA	NA
ENSG00000130522	JUND	repressed	-0.02501419209544903	-0.48596957269699315	-0.8012367186841362	-1.1817101490077049	-1.3079987309664531	-0.9424518064011655	-0.9484587229786372	FALSE	FALSE	chr19_18100000_18450000	TAD_DOWN	0
ENSG00000130517	PGPEP1	repressed	-0.17842432956782128	-0.4168479574885152	-0.3963366412717715	-0.8267661836979153	-0.5966851730013568	-0.7119810240468005	-0.7390262175119393	FALSE	TRUE	chr19_18100000_18450000	TAD_DOWN	0
ENSG00000130513	GDF15	repressed	-0.7084288128061951	-1.5916405136860163	-2.476780560237805	-3.5488703519709928	-3.195770330369724	-3.2171940729533985	-3.523252564278883	FALSE	TRUE	chr19_18100000_18450000	TAD_DOWN	0
ENSG00000105639	JAK3	repressed	0.06538111450893401	-0.1994350128258501	-0.16742770414103272	-0.2134869593719509	-0.5669966117564376	-0.8718418887299624	-0.8047376935087136	FALSE	FALSE	chr19_17400000_17850000	NA	NA
ENSG00000185361	TNFAIP8L1	repressed	-0.02992151041084543	-0.5987841073909038	-0.4795667454307415	-0.5571968011060215	-0.813731195916648	-1.00615977140762	-0.8099578948982729	FALSE	FALSE	chr19_4550000_4650000	NA	NA
ENSG00000269244	RPL23AP78	repressed	-0.86229993355789325	-0.9170846436825923	-2.202696318341854	-1.4307038886825965	-1.2584922125018174	-0.8874997716910087	-0.7014537485786743	FALSE	FALSE	NA	NA	NA
ENSG00000213904	LIPE-AS1	repressed	-0.33847533790458983	-1.6378265728308878	-0.4522519176216764	-0.14567200776412786	-0.6705079127538016	-0.875295001934542	-0.5809150762326403	FALSE	FALSE	NA	NA	NA
ENSG00000209702	SNORD41	repressed	-0.6491917892191345	-4.975665712572336	-3.096964739588796	-2.1395895985143434	-0.6897243742255069	-0.3859251317858251	0.31748654358096096	FALSE	FALSE	chr19_12650000_12950000	TAD_BALANCED	0.666666666666667
ENSG00000105613	MAST1	repressed	-0.30133383321706597	-0.6516510806879252	-0.32550250853428553	-0.9141847640058978	-0.7177922019545918	-1.1072055831892584	-1.0275766788627176	FALSE	FALSE	chr19_12650000_12950000	TAD_BALANCED	0.666666666666667
ENSG00000132003	ZSWIM4	repressed	-0.187500451048986	-0.7631203350381189	-1.8053331596155504	-2.2011830929308456	-2.048650710950939	-1.8054752483255725	-1.9546755900639352	FALSE	TRUE	chr19_13750000_13850000	TAD_DOWN	0
ENSG00000180739	S1PR5	repressed	-0.13776281801127413	-0.6203682221463062	-0.3912565223055037	-0.5028833876559764	-1.1101327696074583	-0.7364970097479259	-0.9877428289647956	FALSE	FALSE	chr19_10400000_10700000	TAD_DOWN	0
ENSG00000167680	SEMA6B	repressed	-0.02470723597981825	-0.4952175918365399	-0.03377543586233704	-0.28770876744227936	-0.571544816638849	-0.5757555081872814	-0.7635459890106113	FALSE	FALSE	chr19_4550000_4650000	NA	NA
ENSG00000105287	PRKD2	repressed	-0.08210893844289655	-0.6432225971254245	-0.559546723954973	-0.5789435059343985	-0.6217379354404791	-0.7695547815002016	-0.6536692049401981	FALSE	FALSE	chr19_46600000_46750000	NA	NA
ENSG00000115255	REEP6	repressed	0.01941077934595078	-0.8017512548217078	-0.4955459723251114	-0.6458994913972188	-0.30040731170843815	-0.19061982094980315	-0.4686711444004707	FALSE	FALSE	chr19_1450000_1850000	TAD_UP	1
ENSG00000188051	TMEM221	repressed	-0.560132848720972	-1.245743008012314	-0.5490893348633241	-1.2695290563460806	-1.264233534688067	-1.383977314674682	-1.369301901671346	FALSE	FALSE	chr19_17400000_17850000	NA	NA
ENSG00000105605	CACNG7	repressed	0.20659434369923907	0.03021904082299725	-0.23375006245834973	-0.6576826652012884	-0.7201626236288013	-0.910118633235204	-0.9949415335213524	FALSE	FALSE	chr19_51000000_58550000	TAD_DOWN	0.3
ENSG00000142408	CACNG8	repressed	-0.15227049798360062	-0.5801453367809484	-0.6283845491643085	-1.0740727164487311	-0.8756988236710057	-1.1606018328163683	-1.1679847195152244	FALSE	FALSE	chr19_51000000_58550000	TAD_DOWN	0.3
ENSG00000130433	CACNG6	repressed	-0.03674409598236901	-0.06344036816051132	-0.30142537522494955	-0.5456217762193507	-0.4909087911166589	-0.7977374191501219	-1.059119010220438	FALSE	FALSE	chr19_51000000_58550000	TAD_DOWN	0.3
ENSG00000130477	UNC13A	repressed	-0.03896317765886537	-0.461635974786223	-0.47154757636292377	-0.6773505950257547	-0.4239661020114474	-0.6815823684956044	-1.094543892812675	FALSE	FALSE	chr19_17400000_17850000	NA	NA
ENSG00000197608	ZNF841	repressed	-0.19162472987477291	-0.4161850493768557	-0.9557492317555136	-0.5486822137153735	-0.5652229651362887	-0.3786094079292227	-0.45638896859470746	FALSE	FALSE	chr19_51000000_58550000	TAD_DOWN	0.3
ENSG00000235001	EIF4A1P2	repressed	-0.31386533688656587	-0.3130534782577034	-1.3038929889691124	-1.02851920731101	-0.7589956493479053	-0.7248644916471891	-0.6940842960683246	FALSE	FALSE	chrY_5300000_5400000	NA	NA
ENSG00000128283	CDC42EP1	repressed	0.1303800463891937	-0.4984020034040223	-0.556587063269434	-0.81278451052002465	-0.7850149215770608	-0.45500928739244745	-0.34722775814443885	FALSE	FALSE	chr22_37500000_37600000	NA	NA
ENSG00000100302	RASD2	repressed	0.5157853574072836	-0.29821755519916304	-0.4640151921400056	-0.2846159205829066	-0.999215490457036	-0.8606575729346847	-1.276128365083537	FALSE	FALSE	chr22_35300000_36300000	TAD_DOWN	0.25
ENSG00000100100	PIK3IP1	repressed	0.41652455712768216	-0.14904928520486407	-1.0224200629694151	-0.80459543072469	-1.134251019189883	-1.706320488559782	-1.4580904059380262	FALSE	FALSE	chr22_31250000_31350000	NA	NA
ENSG00000169184	MN1	repressed	0.03096618239634317	-0.08026331171987643	-0.24977910914957788	-0.680844773322735	-1.0112568394810444	-1.1713760713232213	-1.3043757460079557	TRUE	TRUE	chr22_26400000_27900000	TAD_DOWN	0.25
ENSG00000128342	LIF	repressed	-0.11439822925891022	-0.4941691707544799	-1.1517326564733836	-1.1751271013504647	-1.0315678294114874	-0.8642702079600354	-0.7294089099028875	FALSE	TRUE	chr22_30200000_30300000	TAD_DOWN	0
ENSG00000232346	NA	repressed	0.00562102110204033	-0.2514916909122344	-1.5953861165090508	-0.36815725573577773	-0.5105927601284084	-0.34866711615180856	-0.25424437676883793	FALSE	FALSE	chr22_31950000_32100000	NA	NA
ENSG00000100344	PNPLA3	repressed	-0.55172959213833	-0.272626043693436	-0.3984030081515128	-0.5660479400185766	-0.07244711845090687	-1.3678041499825369	-0.7536345485084333	FALSE	FALSE	chr22_43200000_43950000	NA	NA
ENSG00000186976	EFCAB6	repressed	-0.1888669999339566	-0.19176768033827776	0.28115064866724554	-0.6230628217666246	-0.6751919126480412	-0.11137406821722128	-0.9357216316197072	FALSE	FALSE	chr22_43200000_43950000	NA	NA
ENSG00000225783	MIAT	repressed	-0.15702818057470627	-0.0889396947098306	-0.218393182803432	-0.879255773392377	-0.8702971920576155	-1.2271023034699975	-1.3610644970500003	FALSE	FALSE	chr22_26400000_27900000	TAD_DOWN	0.25
ENSG00000188064	WNT7B	repressed	0.08113268606125833	-0.01998653932908079	-0.4287852295864936	-0.7711754594994269	-0.9688905914183994	-1.073829225601583	-1.041727653863248	TRUE	TRUE	chr22_45550000_46000000	TAD_BALANCED	0.5
ENSG00000100065	CARD10	repressed	-0.03463934934156787	-0.4481531640078827	-0.2425872544227696	-0.4838890797723373	-0.5033148741596267	-0.8461514371233692	-0.8234540027101924	FALSE	FALSE	chr22_37500000_37600000	NA	NA
ENSG00000280383	NA	repressed	-0.1020609957604267	-0.7851843453901666	-1.1827733963009297	-0.9145556594149696	-0.7799582027328198	-0.5910827798323767	-0.8093431896054333	FALSE	TRUE	chr22_45550000_46000000	TAD_BALANCED	0.5
ENSG00000128408	RIBC2	repressed	-0.30216362522489004	-0.903339855299012	-0.08025261722274975	-0.21929184663446247	-1.169208312760807	-1.7779002685915934	-1.5984621350236925	FALSE	FALSE	chr22_45400000_45550000	TAD_UP	1
ENSG00000198125	MB	repressed	-0.13427509408664062	-0.19169364144945789	-0.106479942110299	-0.2072418336050195	-0.1882692506183296	-0.5555825314100397	-0.9070768108024004	FALSE	TRUE	chr22_35300000_36300000	TAD_DOWN	0.25
ENSG00000138944	SHISAL1	repressed	0.16573291593024758	0.33073036222425445	0.01274234091267809	-0.08201530775549579	-0.5113759055480707	-0.8836232068510004	-0.8194291143543495	FALSE	FALSE	chr22_43950000_44700000	TAD_DOWN	0
ENSG00000100060	MFNG	repressed	-0.0197332177224966	-0.6030929830843739	-0.4414317452558451	-1.2559223406157871	-0.7097999600076391	-1.4380283712360584	-1.212307180200539	FALSE	FALSE	chr22_37300000_37500000	NA	NA
ENSG00000178026	LRRC75B	repressed	-0.1522326410018691	-0.5282792911470239	0.19090387776129863	-0.22400706087547365	-0.5616925011168684	-0.5797606178717292	-0.8481725962518033	FALSE	FALSE	chr22_24550000_24650000	NA	NA
ENSG00000172346	CSDC2	repressed	-0.2518929842167589	-0.4287290413276907	-0.4147552364969426	-0.18349689863654617	-0.6610470616882366	-1.5088983658432285	-1.0952215315083969	FALSE	FALSE	chr22_41550000_41650000	NA	NA
ENSG00000100292	HMOX1	repressed	-0.17031264197473014	0.03422688195013646	-0.6195225651490636	-0.9698357828823332	-1.1462750613832533	-1.5129513990638266	-1.5679521866326656	FALSE	FALSE	chr22_35300000_36300000	TAD_DOWN	0.25
ENSG00000183963	SMTN	repressed	0.03439337693421515	-0.48619334739356573	-0.3725964138907113	-0.5011483639674859	-0.7538660359739163	-0.9349083810989413	-1.0076304405547487	FALSE	TRUE	chr22_31050000_31150000	TAD_DOWN	0
ENSG00000184949	FAM227A	repressed	0.01223351531115604	-0.2925299495811582	-0.5072077317773913	-0.8447307599049986	-0.7129760245229274	-0.901359355317914	-0.9277351809325008	FALSE	FALSE	chr22_38600000_38700000	NA	NA
ENSG00000187860	CCDC157	repressed	-0.3582027169371715	-0.5270501757262188	-0.5048422087765116	-0.6484559247778406	-0.686380317406017	-1.1140209539193522	-1.1395517465046774	FALSE	FALSE	chr22_30300000_30400000	NA	NA
ENSG00000215386	MIR99AHG	repressed	-0.12663343316943443	-0.6963731137522509	-0.46076589857543726	-1.6390844610255983	-0.5915798022320489	-1.0563971600241884	-0.873091174432612	FALSE	FALSE	chr21_15850000_17350000	NA	NA
ENSG00000281903	LINC02246	repressed	-0.3641914422737183	0.08740841180069736	-0.7350074756818239	-0.216681140920076	-0.57418290763673	-2.1545601189588064	-1.295402644867215	FALSE	FALSE	chr21_14250000_15850000	TAD_UP	1
ENSG00000243927	MRPS6	repressed	-0.1723844068898994	-0.134040651689135	-0.6037190002990901	-0.4860551126336421	-0.5376668264741891	-0.7922421553091114	-0.5857180449502845	FALSE	FALSE	chr21_33900000_34400000	NA	NA
ENSG00000235609	NA	repressed	-0.09525310204716636	-0.3697426150906603	-0.9365354345614636	-1.032446664416672	-0.6012136699363816	-0.8079415885031411	-0.5587320535756616	FALSE	FALSE	chr21_14250000_15850000	TAD_UP	1
ENSG00000230479	NA	repressed	0.10659978038790628	-0.16054715146731122	-0.7874401742757225	-0.6343680437576662	-2.5005574349710047	-1.9283613556631736	-2.2782404054755303	FALSE	TRUE	chr21_36400000_36950000	TAD_DOWN	0
ENSG00000233818	NA	repressed	-0.49810538180624936	-0.15973230169438524	-0.5858148138741541	-1.053832712396287	-1.74078645229547	-1.2696458993246478	-1.8016203869720464	FALSE	FALSE	chr21_36400000_36950000	TAD_DOWN	0
ENSG00000230982	DSTNP1	repressed	-0.7002811555780661	-0.7831074899652936	-2.063345721961839	-1.1634081912652716	-0.6610316654259067	-1.0957586649947653	-0.2571693317845493	FALSE	FALSE	chr21_46600000_46700000	NA	NA
ENSG00000226054	MEMO1P1	repressed	-0.3844859280257109	-0.7371345177678379	-0.9259728020593287	-0.49445152751656185	-0.4764752536804115	-0.5162561346024945	-0.9685061643043432	FALSE	TRUE	chr21_36100000_36400000	TAD_DOWN	0
ENSG00000159263	SIM2	repressed	0.25613483877734144	0.05082014737138955	-0.5212017165071169	-1.2743151388580043	-1.4579974246278826	-1.7166932738257972	-1.8768126745354912	FALSE	TRUE	chr21_36400000_36950000	TAD_DOWN	0
ENSG00000237864	LINC00322	repressed	0.38852565169843734	-0.7022150298658911	0.322988335913554	-0.5827366804526031	-0.31445670746828785	-0.7634473490302897	-1.3011423253416476	FALSE	FALSE	chr21_43150000_43400000	TAD_UP	1
ENSG00000183778	B3GALT5	repressed	-0.1678502467185473	0.01712927543340474	-0.14249529563913685	-0.6677881230945248	-0.7430734074568515	-0.7224776712060558	-0.7750547799000276	FALSE	FALSE	chr21_39500000_39750000	NA	NA
